# Supplementary material
Source: PubMed Central journal article supplement (PMC9531541)
Supplement: NIHMS1839132-supplement-Tables_S1_S13_and_Figures_S1_S35.pdf [file NIHMS1839132-supplement-Tables_S1_S13_and_Figures_S1_S35.pdf]

# Supporting Information

## Cyclosporin A: Conformational Complexity and Chameleonicity

*Satoshi Ono,<sup>\*†</sup> Matthew R. Naylor,<sup>‡</sup> Chad E. Townsend,<sup>‡</sup> Chieko Okumura,<sup>†</sup> Okimasa Okada,<sup>†</sup> Hsiao-Wei Lee,<sup>‡</sup> and R. Scott Lokey<sup>\*‡</sup>*

<sup>†</sup>Modality Laboratories, Innovative Research Division, Mitsubishi Tanabe Pharma Corporation, 1000 Kamoshida-cho, Aoba-ku, Yokohama, Kanagawa 227-0033, Japan

<sup>‡</sup>Department of Chemistry and Biochemistry, University of California Santa Cruz, 1156 High Street, Santa Cruz, California 95064, United States

### Corresponding Authors

\*E-mail: [ono.satoshi@mg.mt-pharma.co.jp](mailto:ono.satoshi@mg.mt-pharma.co.jp).

\*E-mail: [slokey@ucsc.edu](mailto:slokey@ucsc.edu).

**NMR Acquisition + Processing and Atom shift assignments**

**Sampling Efficiency and Convergence Analysis of AMBER ff03**

**FEL analyses via the molecular shapes**

**Surface areas**

**Figure S1.** Convergence analysis

**Figure S2.** Flat potential energy distributions and a reweighted canonical distribution at T = 300 K using

ff03.

**Table S1:** Zones for virtual states and real potential energy with ff03 in each solvent.

**Table S2.** RMSD Between the C<sub>α</sub> Atoms of the Conformations in Figure 2b.

**Figure S3.** FELs of the molecular shape in each solvent and force field at T = 300 K.

**Table S3-S6.** Positions of the representative conformation and its free energy value obtained from the FELs of each force field.

**Figure S4.** FELs of the molecular shape in each solvent and force field at T = 300 K.

**Figure S5.** Boxplots of SASA and PSA in each solvent and force field obtained by an ensemble of 10,000 conformers at T = 300 K.

**Figures S6-S9:** Free-energy profile along dihedral angle  $\omega$  in each solvent and force field.

**Figure S10.** Distributions of CoSIMS results of each solvent and force field.

**Figure S11:** Coco-MD like conformer counts.

**Table S7:** Upper limit distances in CDCl<sub>3</sub>.

**Table S8:** Upper limit distances in cyclohexane-d12.

**Table S9:** Upper limit distances in n-hexane-d14.

**Table S10:** Amide NH Shift comparison.

**Tables S11-S13:** RMSD of C<sub>α</sub> between the top 10 lowest cNviol conformers obtained from the ff03 and AMBER10:EHT in each apolar solvent.

**Figures S12-S15:** FELs of ( $\phi$ ,  $\psi$ ) in each solvent and force fields at T = 300 K.

**Figure S16:** FELs with ff03 at T = 400 K and 500 K for each solvent.

**Figure S17.** Radial distribution functions between metal ion and carbonyl oxygens.

**Figures S18-S35:** NMR Spectra of CsA in apolar solvents.

## NMR Data

### NMR Acquisition + Processing

<sup>1</sup>H detected 1D and 2D NMR spectra were obtained using a Bruker 800 MHz AVANCE III HD spectrometer equipped with a 5.0 mm TCI cryoprobe and a z-gradient system. 1D proton spectra were recorded using a standard one-pulse sequence (30 degrees flip angle) with a relaxation delay of 1 s and an acquisition time of 2.94 s. 32 scans of 65536 points covering 11160.7 Hz were recorded. Data was zero-

filled to 65536 complex points and an exponential window function was applied with a line-broadening factor of 0.3 Hz prior to Fourier transformation.

All 2D experiments (except ROESY) for NMR assignment were recorded at a temperature of 298K with a relaxation delay of 1.0 s. For gradient COSY spectra,<sup>1</sup> a data matrix of  $400 \times 2048$  points covering  $11160.7 \times 11160.7$  Hz was recorded with 4 scans for each increment. Data was linear predicted to  $1024 \times 2048$  points using 32 coefficients and zero filled to  $2048 \times 2048$  points. A sine square bell-shaped window function was applied in F2 and F1 dimension, prior to magnitude mode type 2D Fourier transformation. For edited coherence order selective gradient HSQC spectra<sup>2</sup> using adiabatic inversion pulses on the carbon channel, a data matrix of  $512 \times 2048$  points covering  $33202.2 \times 11160.7$  Hz was recorded using 32 scans for each increment. Data was zero filled to  $1024 \times 2048$  points prior to echo- anti echo type 2D Fourier transformation. A sine square bell-shaped window function shifted by  $\pi/2$  in both dimensions was applied. For HMBC spectra,<sup>3</sup> a data matrix of  $512 \times 2048$  points covering  $44270.7 \times 11160.7$  Hz with 64 scans for each increment was recorded using a double low pass J-filter and F1 absorption mode. Data was zero-filled to  $1024 \times 2048$  complex points and a sine bell shaped window function was applied in both F1 and F2. Data was converted to magnitude mode in F2 prior to analysis. ROESY<sup>4</sup> spectra was recorded with a relaxation delay of 1.5 s, a spin lock time of 300 ms and a data matrix of  $512 \times 2048$  points covering  $11160.7 \times 11160.7$  Hz. 16 scans were recorded for each increment. Data was zero filled to  $1024 \times 2048$  points prior to States-TPPI type 2D Fourier transformation and a sine square bell-shaped window function

shifted by  $\pi/2$  in both dimensions was applied. For MLEV-17 based TOCSY spectra,<sup>5</sup> a data matrix of  $512 \times 2048$  points covering  $9615.4 \times 9602.5$  Hz. 16 scans were recorded for each increment. Data was zero filled to  $1024 \times 2048$  complex points prior to TPPI type 2D Fourier transformation. A sine square bell-shaped window function shifted by  $\pi/2$  in both dimensions was applied. All spectra were referenced according to the internal solvent signal ( $^1\text{H}$ :  $\text{CDCl}_3 = 7.26$  ppm and  $^{13}\text{C}$ :  $\text{CDCl}_3 = 77.16$  ppm).

### Atom shift assignments

NMR spectra were matched to the structure of Cyclosporin A (CsA) in MestReNova primarily from HSQC, followed by inferential correlations from HMBC (especially through amide bonds), and COSY / TOCSY cross-peaks.

ROESY NOE's were acquired via oval 2D integration of peaks, measuring both cross-peaks separately, and calculating the average if both peaks appeared clean. Distances were calculated by normalizing each measured AUC to the AUC measured between both alpha protons on Sar<sup>3</sup> to their expected distance (1.797 Å).

$$Distance_{HEX,\text{\AA}} = 1.797 \times (519.62/NOE_{AUC})^{1/6}$$

$$Distance_{CHX,\text{\AA}} = 1.797 \times (854/NOE_{AUC})^{1/6}$$

$$Distance_{CDCl_3,\text{\AA}} = 1.797 \times (3774/NOE_{AUC})^{1/6}$$



Measured NOE's that were ambiguous or identified in a region of high background noise were not considered for identifying distance violations. Measured distances of 4.5 Å or higher were also not used. Diastereotopic protons and NMethyls were considered as centroids, noted as “?” in the atom ID.

### Sampling Efficiency and Convergence Analysis of AMBER ff03

Detailed convergence analysis has been presented elsewhere.<sup>6</sup> Here, we briefly described how a convergence of the multicanonical energy distribution was obtained from a long trajectory (LT; i.e.,  $1.0 \times 10^7$  steps) and the first  $m$  steps of the simulation. Assuming the LT multicanonical energy distribution,  $\ln P_{McMD}^{LT}$ , was converged (Figures S1a and b), a convergence of the first  $m$  steps in the LT would be calculated, as follows:  $\Delta \ln P_{McMD}(m) = [\langle (\ln P_{McMD}^m - \ln P_{McMD}^{LT})^2 \rangle_E]^{1/2}$ . Similarly, the deviation of  $n \times$  LT was calculated, as follows:  $\Delta \ln P_{McMD}(n) = [\langle (\ln P_{McMD}^n - \ln P_{McMD}^{LT})^2 \rangle_E]^{1/2}$ . The energy average,  $\langle \dots \rangle_E$ , was obtained from the energy ranges that are listed in Table S1.

Flat potential-energy distributions were obtained in each solvent, and the convergence,  $\Delta \ln P_{McMD}$ , in the simulation steps was estimated (Figures S1a, b and S2). By setting the converged threshold at  $\Delta \ln P_{McMD}(m) = 0.05$ , most of the solvents converged at  $m \geq 5.0 \times 10^6$  steps (aggregating 2.88  $\mu$ s). Figure S1b indicates that  $\Delta \ln P_{McMD}(n)$  was approximately converged to 0.05 within 256 independent LT runs (aggregating 5.12  $\mu$ s). Based on these results, a common protocol was applied for all the solvents with

some margin ( $1.0 \times 10^7$  steps  $\times$  288 independent runs (aggregating 5.76  $\mu$ s)). Thus, this simulation length was set as a standard protocol for the other AMBER:1xEHTs ( $x = 0, 2,$  and 4) force fields.

Neale, et al.<sup>7</sup> reported that an amide trans/cis isomerization was observed during high-temperature MD. Since the flat potential-energy region was set to correspond to the temperature between 280 and 1503 K, cis/trans isomerization was frequently observed mainly in N-methylated amino acids (Figure S1c). For those residues, the number of the isomeric changes between the trans/cis amide conformers, which occurred in one simulation ( $1.0 \times 10^7$  steps), was 4–15 on an average for the standard protocol trajectories. Therefore, the free-energy profiles and population along the dihedral angle,  $\omega$  (the cis/trans amide isomer), could be precisely analyzed.

**FEL analyses via the molecular shapes.** The molecular shape is defined by the normalized principal moments of inertia and is represented by two-dimensional (2D) triangular graphs in which the left and right top corners are rod- and sphere-like, respectively, and the bottom is disk-like (Figures S4a–d). Although the relationship between the conformation and PC plane was already determined, the molecular-shape graphs were suitable for the rough comparison of the overall molecular shapes from the MD trajectories. Noteworthy, FEL exhibited the molecular-shape distribution of CsA rather than a single point under all the conditions.

With AMBER ff03, FELs evidently revealed that CsA adopted stable rod-like conformations in all the solvents (Figure S4a), and this corresponds to **1** (Figure 2b in the main text). FELs of the polar solvents exhibited a wider distribution in the molecular shape space, as well as along the PC plane, than those of the apolar solvents, indicating that CsA could adopt flexible conformations, i.e., the metastable conformations were widely distributed in the molecular shape space, except for the rod and sphere corners. With AMBER10:EHT, only the apolar solvents exhibited **1**. The distribution obtained in CHCl<sub>3</sub> with AMBER10:EHT was wider than those of AMBER ff03. Interestingly, another rod-like conformation (*E*) with only one or two IMHB(s), which has not been reported experimentally, appeared in the polar solvents and CHCl<sub>3</sub>. With AMBER12:EHT, **1** was not observed in the molecular shape space. Moreover, *E* appeared in the polar solvents and CHCl<sub>3</sub>. In all the solvents, the metastable conformation comprising rod-to-sphere shapes, which is the main characteristic of this force field, appeared. Conformation *E* was the most stable conformation in AMBER14:EHT. Although the overall distributions of all the solvents were similar, their detailed distributions were slightly different.

**Surface areas.** We have reported an excellent correlation between the cell permeability and SASA of CHX in cyclic hexapeptide diastereomers.<sup>8</sup> Thus, the smallest SASA conformation in the apolar solvents in ff03 could be the most permeable (Figure S5a). Generally, it is known that the polar surface area (PSA) of bRo5 compounds correlates with its permeability.<sup>9</sup> With ff03, the PSAs tended to be larger and smaller

in the polar and apolar solvents, respectively. Conversely, these tendencies were not observed in the AMBER1x:EHT force fields (Figure S5b).

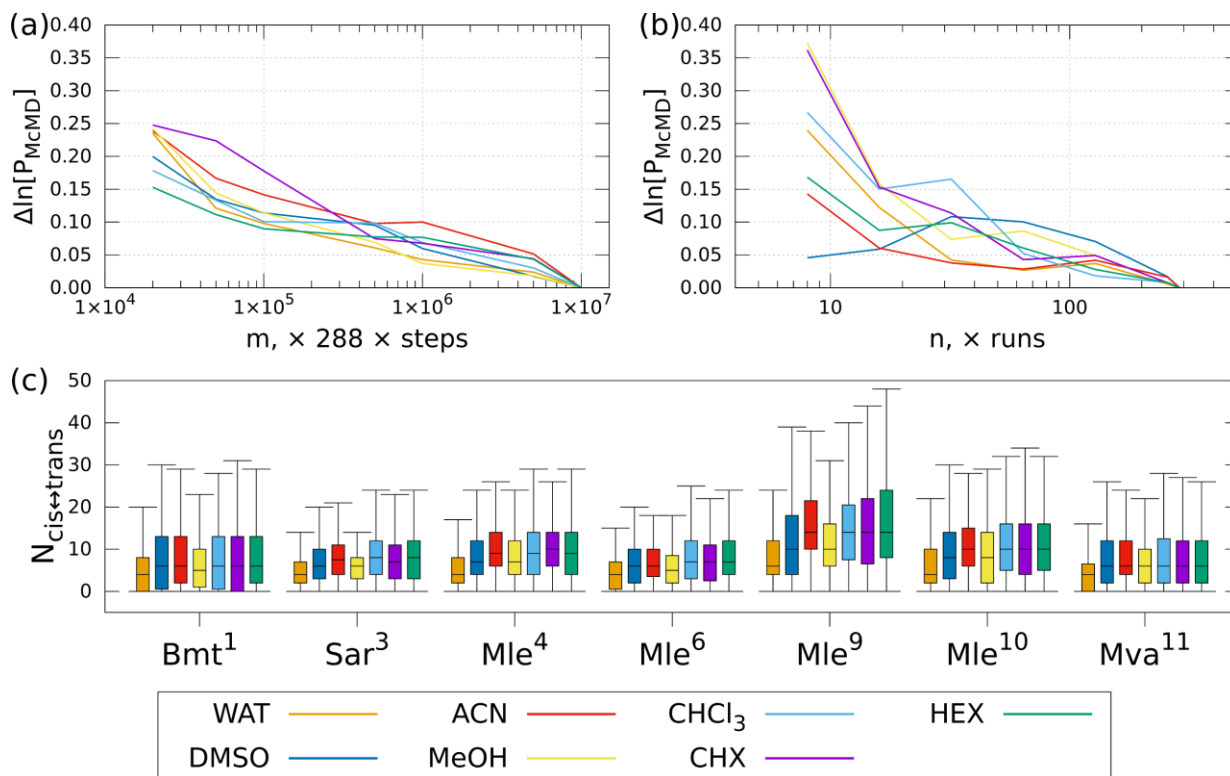

**Figure S1.** Dependencies of  $\Delta \ln P_{\text{McMD}}$  on the (a) first  $m$  steps and (b)  $n$  LTs in each solvent employing ff03. (c) Boxplot for the number of cis/trans isomeric changes in each N-methylated residue of LT trajectories with ff03. The color of each solvent is shown in the bottom box.

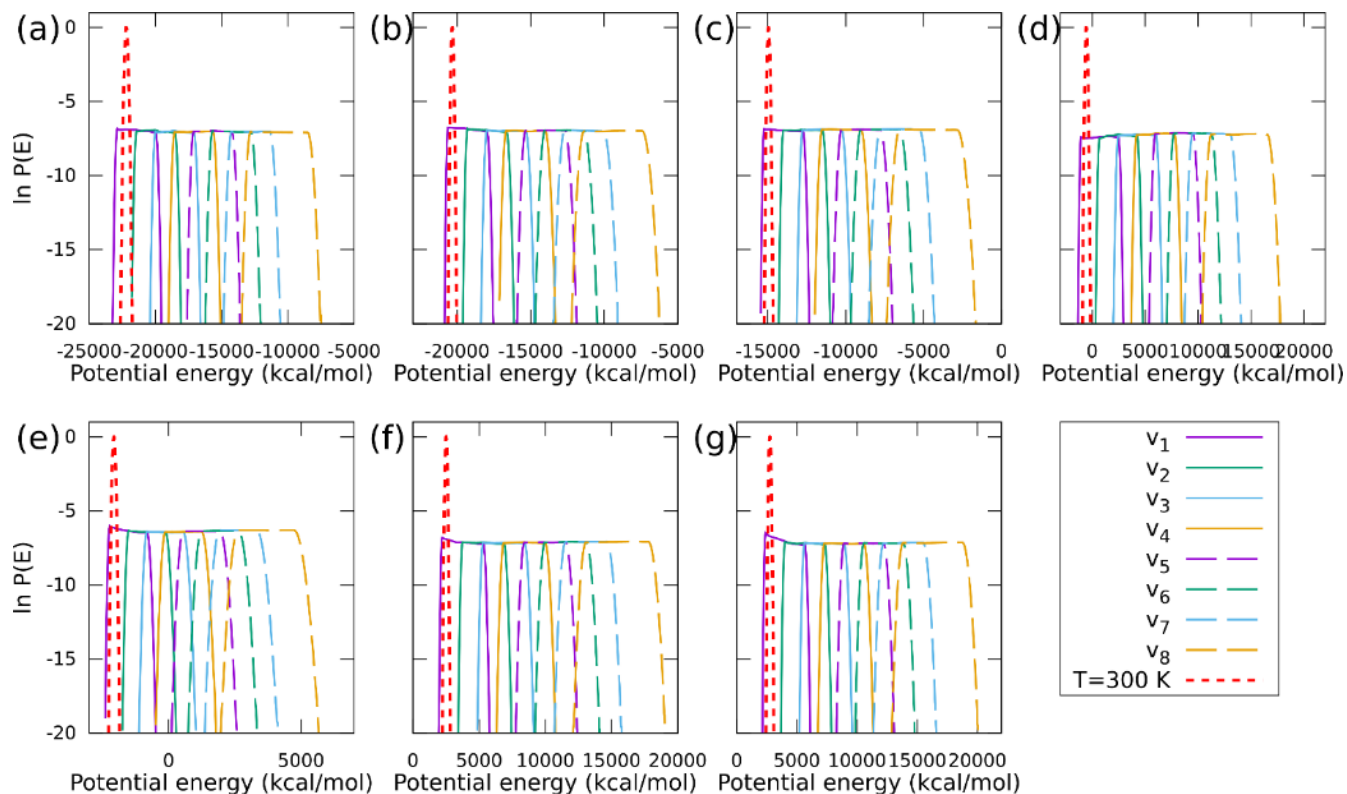

**Figure S2.** Flat potential energy distributions and a reweighted canonical distribution at  $T = 300$  K for each solvent using ff03. (a) WAT, (b) DMSO, (c) ACN, (d) MeOH, (e)  $\text{CHCl}_3$ , (f) CHX, and (g) HEX.

**Table S1.** Zones for virtual states and real potential energy with ff03 in each solvent.

| i | Virtual state range |     | WAT      |          | DMSO     |          | ACN      |          | MeOH     |         | $\text{CHCl}_3$ |         | CHX     |         | HEX     |         |
|---|---------------------|-----|----------|----------|----------|----------|----------|----------|----------|---------|-----------------|---------|---------|---------|---------|---------|
|   | low                 | up  | low      | up       | low      | up       | low      | up       | low      | up      | low             | up      | low     | up      | low     | up      |
|   | 0                   | 0.0 | 0.2      | -22870.8 | -19976.1 | -20622.0 | -17966.5 | -15239.2 | -12751.2 | -1052.6 | 2464.1          | -2224.9 | -813.4  | 2201.0  | 5311.0  | 2392.3  |
| 1 | 0.1                 | 0.3 | -21411.5 | -18540.7 | -19282.3 | -16650.7 | -13995.2 | -11507.2 | 693.8    | 4210.5  | -1507.2         | -119.6  | 3756.0  | 6866.0  | 4019.1  | 7296.7  |
| 2 | 0.2                 | 0.4 | -19976.1 | -17105.3 | -17966.5 | -15334.9 | -12751.2 | -10263.2 | 2464.1   | 5980.9  | -813.4          | 550.2   | 5311.0  | 8421.1  | 5645.9  | 8923.4  |
| 3 | 0.3                 | 0.5 | -18540.7 | -15669.9 | -16650.7 | -14019.1 | -11507.2 | -9019.1  | 4210.5   | 7727.3  | -119.6          | 1244.0  | 6866.0  | 9976.1  | 7296.7  | 10574.2 |
| 4 | 0.4                 | 0.6 | -17105.3 | -14234.5 | -15334.9 | -12679.4 | -10263.2 | -7775.1  | 5980.9   | 9497.6  | 550.2           | 1937.8  | 8421.1  | 11531.1 | 8923.4  | 12201.0 |
| 5 | 0.5                 | 0.7 | -15669.9 | -12799.0 | -14019.1 | -11363.6 | -9019.1  | -6531.1  | 7727.3   | 11244.0 | 1244.0          | 2631.6  | 9976.1  | 13086.1 | 10574.2 | 13827.8 |
| 6 | 0.6                 | 0.8 | -14234.5 | -11363.6 | -12679.4 | -10047.9 | -7775.1  | -5287.1  | 9497.6   | 13014.4 | 1937.8          | 3325.4  | 11531.1 | 14641.2 | 12201.0 | 15478.5 |
| 7 | 0.7                 | 1.0 | -12799.0 | -8492.8  | -11363.6 | -7416.3  | -6531.1  | -2823.0  | 11244.0  | 16531.1 | 2631.6          | 4736.8  | 13086.1 | 17775.1 | 13827.8 | 18756.0 |

Unit of real energy range is kcal/mol.

**Table S2.** RMSD Between the C $\alpha$  Atoms of the Conformations in Figure 2b.

| Conformation | <b>1</b>    | <b>2</b> | <b>3</b>    | <b>4</b> | <b>5</b> | <b>6</b> | <b>7</b> | <i>A</i> | <i>B</i> | <i>C</i> | <i>D</i> | <i>E</i> |
|--------------|-------------|----------|-------------|----------|----------|----------|----------|----------|----------|----------|----------|----------|
| <b>2</b>     | 2.58        |          |             |          |          |          |          |          |          |          |          |          |
| <b>3</b>     | 2.82        | 0.55     |             |          |          |          |          |          |          |          |          |          |
| <b>4</b>     | 2.90        | 1.24     | 1.33        |          |          |          |          |          |          |          |          |          |
| <b>5</b>     | 1.66        | 2.40     | 2.47        | 2.51     |          |          |          |          |          |          |          |          |
| <b>6</b>     | 1.41        | 2.09     | 2.29        | 2.11     | 1.34     |          |          |          |          |          |          |          |
| <b>7</b>     | 3.08        | 3.27     | 3.61        | 2.99     | 3.00     | 2.74     |          |          |          |          |          |          |
| <b>A</b>     | <b>0.70</b> | 2.58     | 2.86        | 2.86     | 1.80     | 1.30     | 2.98     |          |          |          |          |          |
| <b>B</b>     | 2.66        | 0.95     | <b>0.89</b> | 1.37     | 2.39     | 2.08     | 3.69     | 2.66     |          |          |          |          |
| <b>C</b>     | 3.75        | 4.14     | 4.53        | 3.96     | 4.12     | 3.46     | 2.45     | 3.46     | 4.39     |          |          |          |
| <b>D</b>     | 2.57        | 2.25     | 2.32        | 1.97     | 2.15     | 2.11     | 2.60     | 2.77     | 2.58     | 3.99     |          |          |
| <b>E</b>     | 3.89        | 3.42     | 3.57        | 2.97     | 3.81     | 3.37     | 2.95     | 3.83     | 3.56     | 3.32     | 3.03     |          |
| <b>F</b>     | 3.53        | 3.82     | 4.03        | 3.48     | 3.12     | 3.28     | 2.42     | 3.60     | 4.10     | 3.53     | 2.97     | 3.06     |

Unit in angstrom ( $\text{\AA}$ ). The smaller RMSDs between experimentally and computationally derived structures (**1–A** and **3–B**) are written in bold numbers.

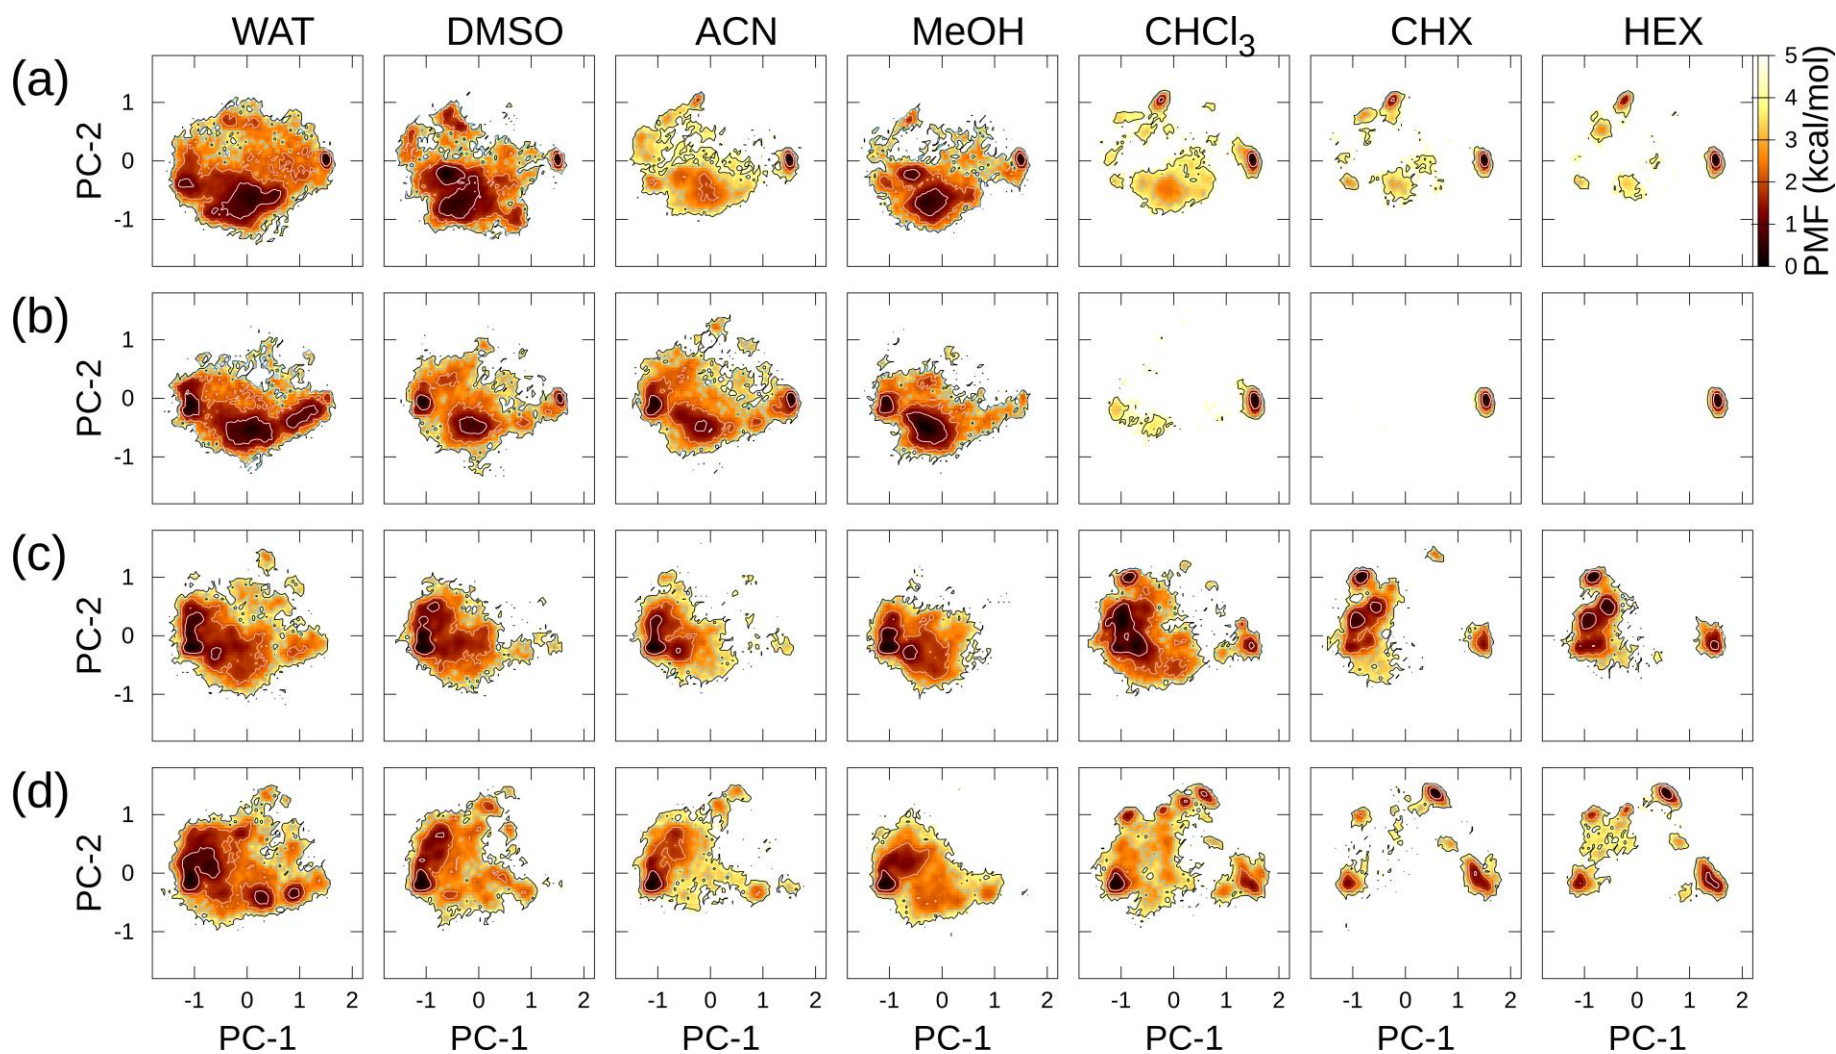

**Figure S3.** FELs along the PC-1 and PC-2 axes in each solvent at 300 K. (a) AMBER ff03, (b) AMBER10:EHT, (c) AMBER12:EHT, and (d) AMBER14:EHT. The contour lines of PMF = 1.0, 2.0, 3.0, and 4.0 kcal/mol are represented by the white, pink, sky-blue, and black lines, respectively. Figures S3a and b are identical to Figures 2a and 3 in the main text, respectively, and shown here for comparison with the other force fields.

**TableS3.** Positions of the representative conformation and its free energy value obtained from the FELs

using ff03.

| ID | WAT           |      | DMSO          |      | ACN          |      | MeOH          |      | CHCl <sub>3</sub> |      | CHX           |      | HEX          |      |
|----|---------------|------|---------------|------|--------------|------|---------------|------|-------------------|------|---------------|------|--------------|------|
|    | (PC-1,PC-2)   | ΔF   | (PC-1,PC-2)   | ΔF   | (PC-1,PC-2)  | ΔF   | (PC-1,PC-2)   | ΔF   | (PC-1,PC-2)       | ΔF   | (PC-1,PC-2)   | ΔF   | (PC-1,PC-2)  | ΔF   |
| 1  | (1.40,0.00)   | 1.00 | (1.40,0.00)   | 0.71 | (1.40,0.00)  | 0.00 | (1.40,0.00)   | 0.75 | (1.40,0.00)       | 0.00 | (1.40,0.00)   | 0.00 | (1.40,0.00)  | 0.00 |
| 2  | (0.65,-1.10)  | 2.41 | (0.65,-1.05)  | 1.35 | (0.75,-1.10) | 3.91 | (0.70,-1.05)  | 3.25 | (0.70,-1.05)      | 5.41 | (0.70,-1.05)  | np   | (0.70,-1.05) | 5.79 |
| 3  | (0.65,-1.30)  | 3.87 | (0.70,-1.35)  | 1.98 | (0.70,-1.35) | np   | (0.70,-1.35)  | np   | (0.70,-1.35)      | np   | (0.70,-1.35)  | np   | (0.70,-1.35) | np   |
| 4  | (0.15,-1.15)  | np   | (0.05,-1.20)  | np   | (0.15,-1.20) | np   | (0.05,-1.15)  | np   | (0.05,-1.15)      | np   | (0.10,-1.20)  | np   | (0.10,-1.20) | np   |
| 5  | (0.95,-0.20)  | 2.22 | (1.00,-0.25)  | 2.92 | (0.95,-0.25) | 3.62 | (1.05,-0.30)  | 2.61 | (1.05,-0.25)      | 4.36 | (1.00,-0.25)  | 5.50 | (0.95,-0.20) | 5.63 |
| 6  | (0.95,-0.35)  | 1.92 | (0.95,-0.35)  | 2.41 | (0.90,-0.40) | 2.87 | (0.85,-0.35)  | 2.82 | (0.85,-0.40)      | 4.28 | (0.95,-0.35)  | 5.43 | (0.95,-0.35) | 5.72 |
| 7  | (-0.20,0.65)  | 2.64 | (-0.15,0.65)  | 4.09 | (-0.15,0.65) | 4.34 | (-0.15,0.65)  | 6.02 | (-0.25,0.70)      | 3.98 | (-0.25,0.75)  | 3.67 | (-0.25,0.75) | 4.53 |
| A  | (1.40,0.00)   | 1.00 | (1.40,0.00)   | 0.71 | (1.40,0.00)  | 0.00 | (1.40,-0.05)  | 0.75 | (1.40,0.00)       | 0.00 | (1.40,0.00)   | 0.00 | (1.40,-0.05) | 0.00 |
| B  | (0.80,-1.25)  | 2.37 | (0.75,-1.30)  | 1.21 | (0.75,-1.25) | 3.91 | (0.80,-1.30)  | 3.25 | (0.80,-1.30)      | 5.41 | (0.80,-1.30)  | np   | (0.80,-1.30) | 5.79 |
| C  | (-0.35,1.00)  | 2.90 | (-0.25,1.10)  | 4.47 | (-0.35,1.00) | 1.73 | (-0.30,1.00)  | np   | (-0.35,1.00)      | 0.81 | (-0.35,1.00)  | 0.91 | (-0.35,1.00) | 1.14 |
| D  | (0.05,-0.60)  | 0.00 | (0.05,-0.55)  | 0.00 | (0.10,-0.65) | 0.84 | (0.05,-0.65)  | 0.00 | (0.15,-0.55)      | 1.49 | (0.10,-0.60)  | 2.64 | (0.05,-0.60) | 3.03 |
| E  | (-1.15,-0.05) | 1.92 | (-1.10,-0.10) | 2.13 | (-1.20,0.00) | 2.52 | (-1.10,-0.10) | 2.83 | (-1.20,0.00)      | 3.47 | (-1.20,-0.10) | 3.51 | (-1.20,0.00) | 3.85 |
| F  | (-0.75,0.85)  | 3.89 | (-0.65,0.85)  | 1.90 | (-0.65,0.85) | 2.88 | (-0.65,0.85)  | 3.47 | (-0.70,0.85)      | 3.14 | (-0.75,0.85)  | 2.93 | (-0.65,0.85) | 3.42 |

Unit in kcal/mol. np: no population or higher than 10.0 kcal/mol.

**Table S4.** Positions of the representative conformation and its free energy value obtained from the FELs

using AMBER10:EHT.

| ID | WAT           |      | DMSO          |      | ACN           |      | MeOH          |      | CHCl <sub>3</sub> |      | CHX           |      | HEX           |      |
|----|---------------|------|---------------|------|---------------|------|---------------|------|-------------------|------|---------------|------|---------------|------|
|    | (PC-1,PC-2)   | ΔF   | (PC-1,PC-2)   | ΔF   | (PC-1,PC-2)   | ΔF   | (PC-1,PC-2)   | ΔF   | (PC-1,PC-2)       | ΔF   | (PC-1,PC-2)   | ΔF   | (PC-1,PC-2)   | ΔF   |
| 1  | (1.40,0.00)   | 1.45 | (1.45,0.00)   | 0.52 | (1.45,0.00)   | 0.02 | (1.40,0.00)   | 2.16 | (1.45,0.00)       | 0.00 | (1.45,0.00)   | 0.00 | (1.45,0.00)   | 0.00 |
| 2  | (0.70,-1.00)  | 2.76 | (0.70,-1.05)  | 3.78 | (0.70,-1.05)  | 3.54 | (0.70,-1.05)  | 3.61 | (0.70,-1.05)      | np   | (0.70,-1.05)  | np   | (0.70,-1.05)  | np   |
| 3  | (0.70,-1.35)  | np   | (0.70,-1.35)  | 6.56 | (0.70,-1.35)  | np   | (0.70,-1.35)  | np   | (0.70,-1.35)      | np   | (0.70,-1.35)  | np   | (0.70,-1.35)  | np   |
| 4  | (0.10,-1.20)  | np   | (0.15,-1.20)  | np   | (0.10,-1.25)  | np   | (0.10,-1.20)  | np   | (0.10,-1.20)      | np   | (0.05,-1.20)  | np   | (0.05,-1.20)  | np   |
| 5  | (1.00,-0.30)  | 1.04 | (1.05,-0.30)  | 2.61 | (1.05,-0.20)  | 1.81 | (1.00,-0.25)  | 2.49 | (0.95,-0.30)      | 4.55 | (1.05,-0.20)  | 6.38 | (1.05,-0.20)  | np   |
| 6  | (0.95,-0.35)  | 0.68 | (0.85,-0.45)  | 1.51 | (0.85,-0.45)  | 1.30 | (0.85,-0.40)  | 1.97 | (0.85,-0.45)      | 3.82 | (0.95,-0.35)  | np   | (0.90,-0.40)  | np   |
| 7  | (-0.25,0.65)  | 3.48 | (-0.15,0.70)  | 2.49 | (-0.25,0.65)  | 3.23 | (-0.15,0.65)  | 3.72 | (-0.25,0.75)      | 6.63 | (-0.20,0.65)  | np   | (-0.20,0.75)  | np   |
| A  | (1.45,-0.05)  | 1.46 | (1.45,-0.05)  | 0.52 | (1.45,-0.05)  | 0.06 | (1.45,-0.05)  | 2.18 | (1.45,-0.05)      | 0.02 | (1.45,-0.05)  | 0.02 | (1.45,-0.05)  | 0.04 |
| B  | (0.80,-1.30)  | 2.76 | (0.80,-1.30)  | 3.77 | (0.80,-1.30)  | 3.54 | (0.80,-1.30)  | 3.61 | (0.80,-1.30)      | np   | (0.80,-1.30)  | np   | (0.80,-1.30)  | np   |
| C  | (-0.30,1.05)  | 4.69 | (-0.30,1.05)  | 2.49 | (-0.35,1.00)  | 2.12 | (-0.35,1.05)  | 4.31 | (-0.30,1.00)      | 4.23 | (-0.25,1.10)  | np   | (-0.30,1.00)  | 5.61 |
| D  | (0.05,-0.60)  | 0.00 | (0.05,-0.55)  | 0.32 | (0.05,-0.55)  | 0.28 | (0.05,-0.55)  | 0.00 | (0.05,-0.60)      | 3.80 | (0.15,-0.55)  | 5.44 | (0.05,-0.60)  | 6.54 |
| E  | (-1.15,-0.10) | 0.55 | (-1.20,-0.10) | 0.00 | (-1.15,-0.10) | 0.00 | (-1.20,-0.10) | 0.48 | (-1.20,-0.10)     | 3.43 | (-1.10,-0.10) | 5.22 | (-1.10,-0.10) | np   |
| F  | (-0.75,0.85)  | np   | (-0.65,0.85)  | np   | (-0.70,0.85)  | 2.76 | (-0.75,0.90)  | np   | (-0.75,0.85)      | 5.61 | (-0.75,0.95)  | np   | (-0.75,0.85)  | np   |

Unit in kcal/mol. np: no population or higher than 10.0 kcal/mol.



**Table S5.** Positions of the representative conformation and its free energy value obtained from the FELs using AMBER12:EHT.

| ID | WAT          |      | DMSO          |      | ACN           |      | MeOH          |      | CHCl <sub>3</sub> |      | CHX          |      | HEX           |      |
|----|--------------|------|---------------|------|---------------|------|---------------|------|-------------------|------|--------------|------|---------------|------|
|    | (PC-1,PC-2)  | ΔF   | (PC-1,PC-2)   | ΔF   | (PC-1,PC-2)   | ΔF   | (PC-1,PC-2)   | ΔF   | (PC-1,PC-2)       | ΔF   | (PC-1,PC-2)  | ΔF   | (PC-1,PC-2)   | ΔF   |
| 1  | (1.40,0.00)  | 2.05 | (1.40,0.00)   | 2.89 | (1.45,0.10)   | 2.74 | (1.45,0.05)   | np   | (1.40,0.00)       | 0.45 | (1.40,0.00)  | 0.00 | (1.40,0.00)   | 0.00 |
| 2  | (0.65,-1.00) | 3.95 | (0.65,-1.05)  | np   | (0.70,-1.05)  | np   | (0.70,-1.05)  | np   | (0.70,-1.05)      | np   | (0.70,-1.05) | np   | (0.70,-1.05)  | np   |
| 3  | (0.70,-1.35) | 4.24 | (0.70,-1.35)  | np   | (0.70,-1.35)  | np   | (0.70,-1.35)  | np   | (0.70,-1.35)      | np   | (0.70,-1.35) | np   | (0.70,-1.35)  | np   |
| 4  | (0.10,-1.15) | np   | (0.15,-1.15)  | np   | (0.10,-1.20)  | np   | (0.10,-1.15)  | np   | (0.10,-1.20)      | np   | (0.10,-1.20) | np   | (0.10,-1.20)  | np   |
| 5  | (1.00,-0.25) | 1.53 | (0.95,-0.30)  | 3.13 | (1.05,-0.25)  | 3.47 | (1.00,-0.20)  | 5.53 | (1.05,-0.25)      | 2.35 | (1.00,-0.20) | 2.69 | (1.05,-0.25)  | 2.77 |
| 6  | (0.85,-0.35) | 1.15 | (0.85,-0.35)  | 2.16 | (0.90,-0.40)  | 3.47 | (0.90,-0.40)  | 3.55 | (0.90,-0.35)      | 1.81 | (0.90,-0.45) | np   | (0.90,-0.40)  | 5.07 |
| 7  | (-0.15,0.65) | 2.01 | (-0.25,0.75)  | 3.45 | (-0.25,0.65)  | 4.37 | (-0.25,0.65)  | 4.96 | (-0.25,0.65)      | 2.26 | (-0.25,0.75) | 2.41 | (-0.20,0.70)  | 3.54 |
| A  | (1.35,-0.05) | 2.05 | (1.35,0.00)   | 2.90 | (1.35,-0.05)  | 2.74 | (1.35,0.00)   | np   | (1.35,-0.05)      | 0.45 | (1.40,0.00)  | 0.00 | (1.40,0.00)   | 0.00 |
| B  | (0.80,-1.30) | 3.73 | (0.80,-1.30)  | np   | (0.80,-1.30)  | np   | (0.80,-1.30)  | np   | (0.80,-1.30)      | np   | (0.80,-1.30) | np   | (0.80,-1.30)  | np   |
| C  | (-0.35,1.05) | 2.46 | (-0.30,1.05)  | 4.03 | (-0.30,1.10)  | 4.67 | (-0.35,1.00)  | 4.93 | (-0.25,1.00)      | 2.40 | (-0.30,1.00) | 1.60 | (-0.30,1.05)  | 4.23 |
| D  | (0.10,-0.55) | 0.52 | (0.10,-0.55)  | 1.54 | (0.15,-0.65)  | 1.73 | (0.05,-0.60)  | 0.87 | (0.10,-0.55)      | 0.68 | (0.15,-0.60) | 2.18 | (0.05,-0.55)  | 3.07 |
| E  | (-1.20,0.00) | 0.00 | (-1.15,-0.10) | 0.00 | (-1.15,-0.10) | 0.00 | (-1.15,-0.05) | 0.00 | (-1.15,-0.10)     | 0.00 | (-1.10,0.00) | 0.27 | (-1.10,-0.10) | 0.69 |
| F  | (-0.65,0.85) | 3.68 | (-0.65,0.85)  | 3.18 | (-0.65,0.85)  | 2.62 | (-0.65,0.90)  | 3.43 | (-0.75,0.95)      | 1.17 | (-0.75,0.95) | 0.75 | (-0.75,0.95)  | 1.08 |

Unit in kcal/mol. np: no population or higher than 10.0 kcal/mol.

**Table S6.** Positions of the representative conformation and its free energy value obtained from the FELs using AMBER14:EHT.

| ID | WAT           |      | DMSO          |      | ACN           |      | MeOH          |      | CHCl <sub>3</sub> |      | CHX           |      | HEX           |      |
|----|---------------|------|---------------|------|---------------|------|---------------|------|-------------------|------|---------------|------|---------------|------|
|    | (PC-1,PC-2)   | ΔF   | (PC-1,PC-2)   | ΔF   | (PC-1,PC-2)   | ΔF   | (PC-1,PC-2)   | ΔF   | (PC-1,PC-2)       | ΔF   | (PC-1,PC-2)   | ΔF   | (PC-1,PC-2)   | ΔF   |
| 1  | (1.40,0.05)   | 2.05 | (1.45,0.05)   | 3.91 | (1.50,0.00)   | 3.12 | (1.45,0.05)   | 5.47 | (1.50,0.00)       | 0.35 | (1.50,0.10)   | 0.00 | (1.45,0.00)   | 0.00 |
| 2  | (0.70,-1.05)  | 4.00 | (0.70,-1.05)  | np   | (0.70,-1.05)  | np   | (0.70,-1.05)  | 9.98 | (0.70,-1.05)      | 6.09 | (0.70,-1.05)  | np   | (0.70,-1.05)  | np   |
| 3  | (0.70,-1.35)  | np   | (0.70,-1.35)  | np   | (0.70,-1.35)  | np   | (0.70,-1.35)  | np   | (0.70,-1.35)      | np   | (0.70,-1.35)  | np   | (0.70,-1.35)  | np   |
| 4  | (0.10,-1.20)  | np   | (0.10,-1.20)  | np   | (0.05,-1.20)  | np   | (0.05,-1.15)  | np   | (0.10,-1.20)      | np   | (0.10,-1.20)  | np   | (0.10,-1.20)  | np   |
| 5  | (0.95,-0.30)  | 1.82 | (0.95,-0.30)  | 3.02 | (0.95,-0.30)  | 3.04 | (0.95,-0.30)  | 2.41 | (0.95,-0.30)      | 1.86 | (1.00,-0.20)  | 2.31 | (1.05,-0.20)  | 2.09 |
| 6  | (0.85,-0.40)  | 0.42 | (0.85,-0.35)  | 1.48 | (0.85,-0.35)  | 1.43 | (0.85,-0.45)  | 1.28 | (0.90,-0.40)      | 1.34 | (0.85,-0.40)  | 4.67 | (0.85,-0.40)  | 2.45 |
| 7  | (-0.25,0.65)  | 1.15 | (-0.20,0.65)  | 1.48 | (-0.20,0.65)  | 2.63 | (-0.25,0.65)  | 3.63 | (-0.20,0.70)      | 1.85 | (-0.25,0.75)  | 2.87 | (-0.20,0.65)  | 3.45 |
| A  | (1.40,-0.05)  | 2.05 | (1.35,0.05)   | 3.91 | (1.40,-0.05)  | 3.12 | (1.45,-0.05)  | 5.47 | (1.35,-0.05)      | 0.35 | (1.35,-0.05)  | 0.02 | (1.35,-0.05)  | 0.00 |
| B  | (0.80,-1.30)  | 4.00 | (0.80,-1.30)  | np   | (0.80,-1.30)  | np   | (0.80,-1.30)  | 9.98 | (0.80,-1.30)      | 6.09 | (0.80,-1.30)  | np   | (0.80,-1.30)  | np   |
| C  | (-0.25,1.00)  | 1.95 | (-0.30,1.00)  | 1.41 | (-0.30,1.05)  | 1.98 | (-0.35,1.05)  | 4.26 | (-0.30,1.05)      | 0.88 | (-0.30,1.05)  | 2.18 | (-0.30,1.05)  | 1.31 |
| D  | (0.15,-0.55)  | 1.33 | (0.05,-0.55)  | 2.18 | (0.15,-0.60)  | 3.23 | (0.15,-0.55)  | 1.21 | (0.05,-0.60)      | 3.09 | (0.10,-0.60)  | np   | (0.05,-0.60)  | np   |
| E  | (-1.20,-0.10) | 0.00 | (-1.20,-0.10) | 0.00 | (-1.20,-0.10) | 0.00 | (-1.15,-0.10) | 0.00 | (-1.20,-0.10)     | 0.00 | (-1.20,-0.10) | 0.99 | (-1.15,-0.10) | 0.96 |
| F  | (-0.70,0.90)  | 2.64 | (-0.65,0.85)  | 1.56 | (-0.75,0.85)  | 2.26 | (-0.70,0.90)  | 2.62 | (-0.75,0.95)      | 2.07 | (-0.75,0.90)  | 3.02 | (-0.75,0.85)  | 2.43 |

Unit in kcal/mol. np: no population or higher than 10.0 kcal/mol.

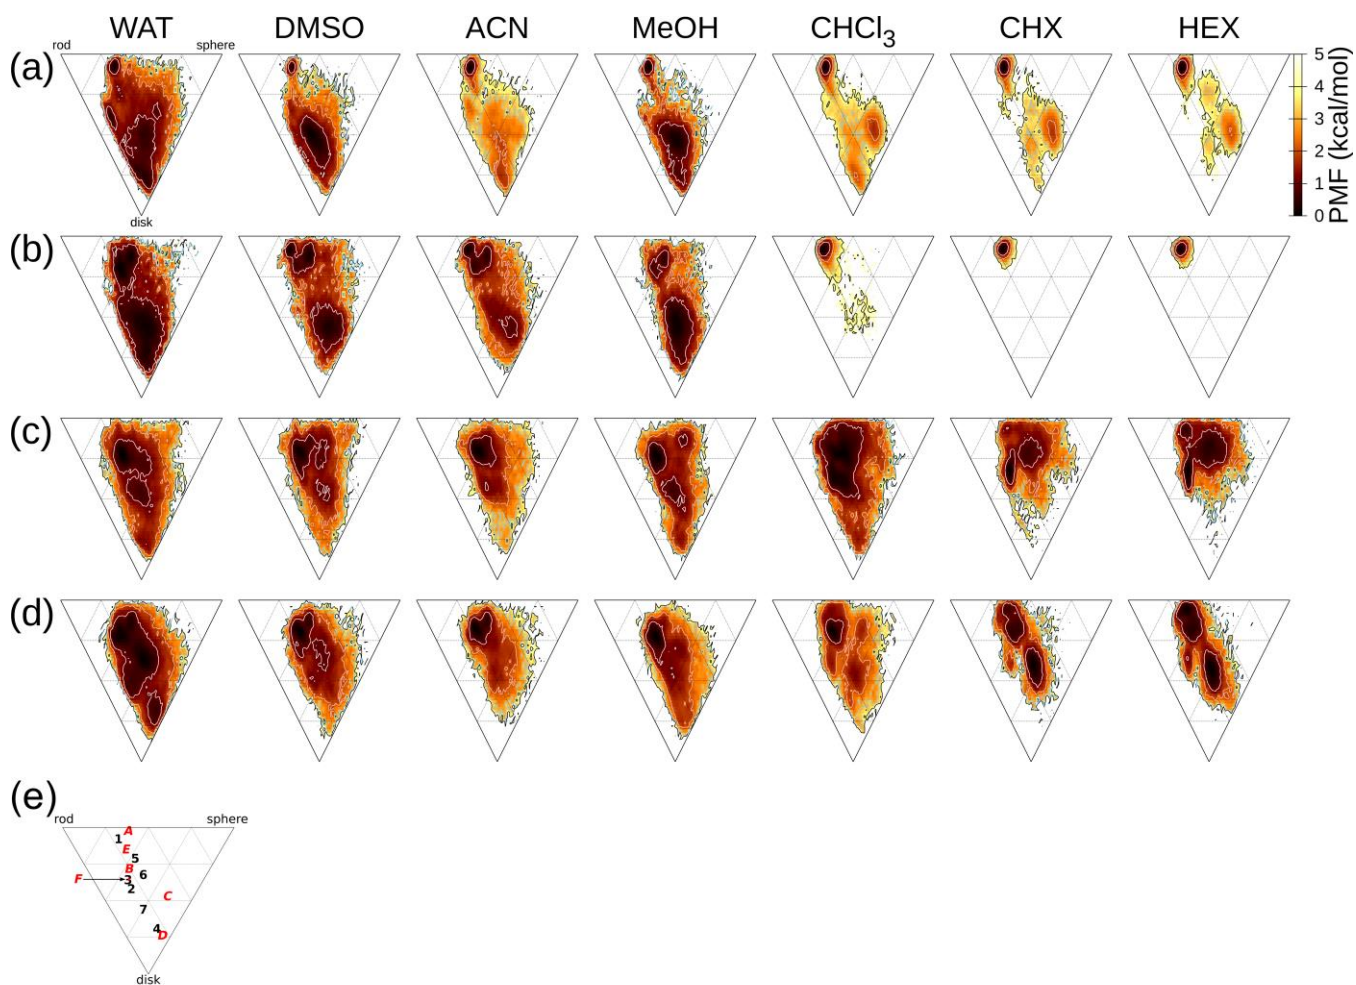

**Figure S4.** FELs of the molecular shape in each solvent and force field at  $T = 300$  K. (a) AMBER ff03, (b) AMBER10:EHT, (c) AMBER12:EHT, and (d) AMBER14:EHT. The contour lines of  $PMF = 1.0, 2.0, 3.0,$  and  $4.0$  kcal/mol are represented by the white, pink, sky-blue, and black lines, respectively. (e) Relation between the position on the graph and the 3D conformation **1-7** and **A-F** in the main text (Figure 2b).

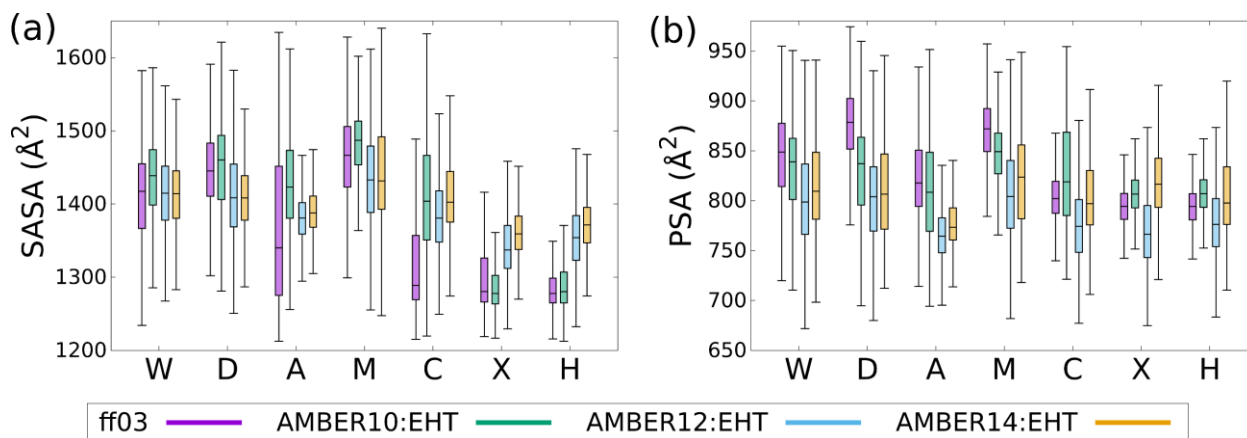

**Figure S5.** (a) Boxplots of SASA and (b) PSA in each solvent and force field obtained by an ensemble of 10,000 conformers at  $T = 300$  K. W, D, A, M, C, X, and H represent WAT, DMSO, ACN, methanol, chloroform, CHX, and HEX, respectively.

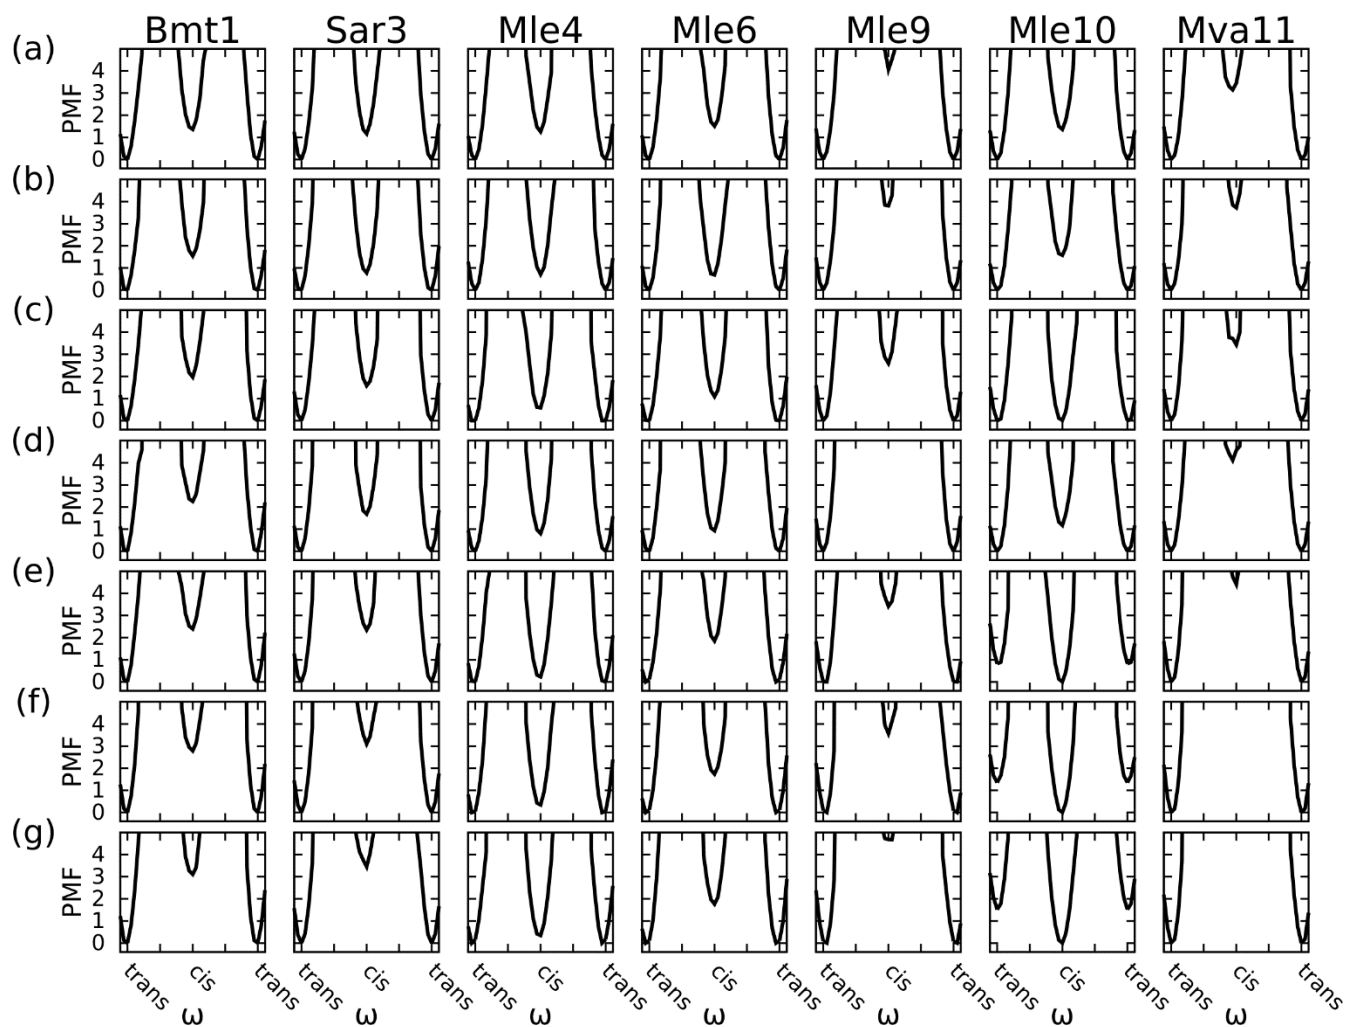

**Figure S6.** Free-energy profile along dihedral angle  $\omega$  using ff03. (a) WAT, (b) DMSO, (c) ACN, (d) MeOH, (e)  $\text{CHCl}_3$ , (f) CHX, and (g) HEX. The unit for PMF is kcal/mol.

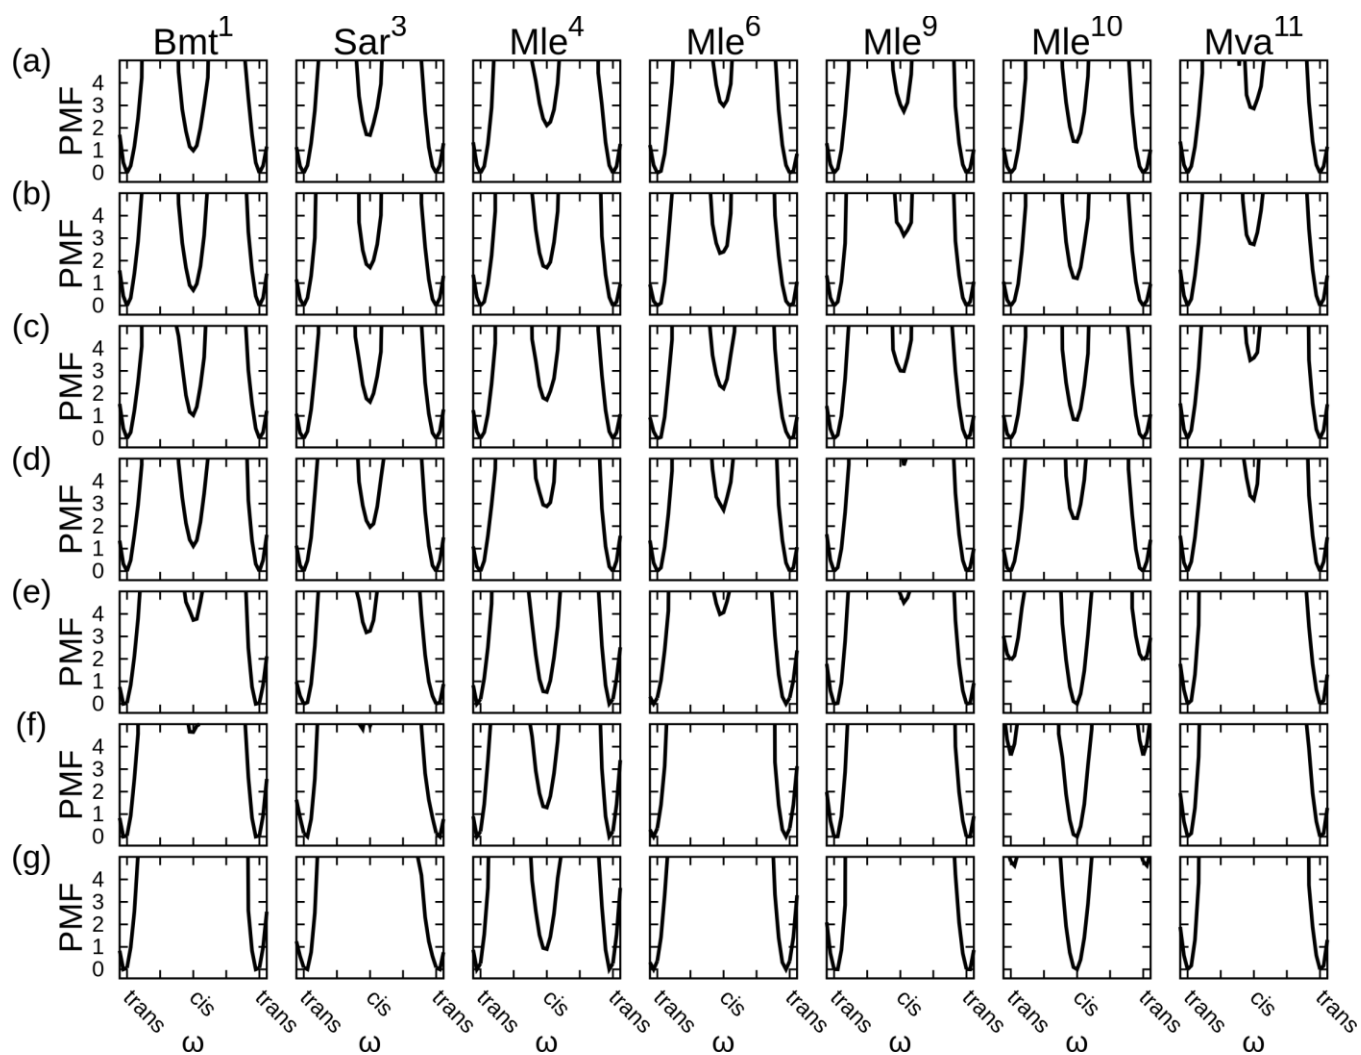

**Figure S7.** Free-energy profile along dihedral angle  $\omega$  using AMBER10:EHT. (a) WAT, (b) DMSO, (c)

ACN, (d) MeOH, (e) CHCl<sub>3</sub>, (f) CHX, and (g) HEX. The unit for PMF is kcal/mol.

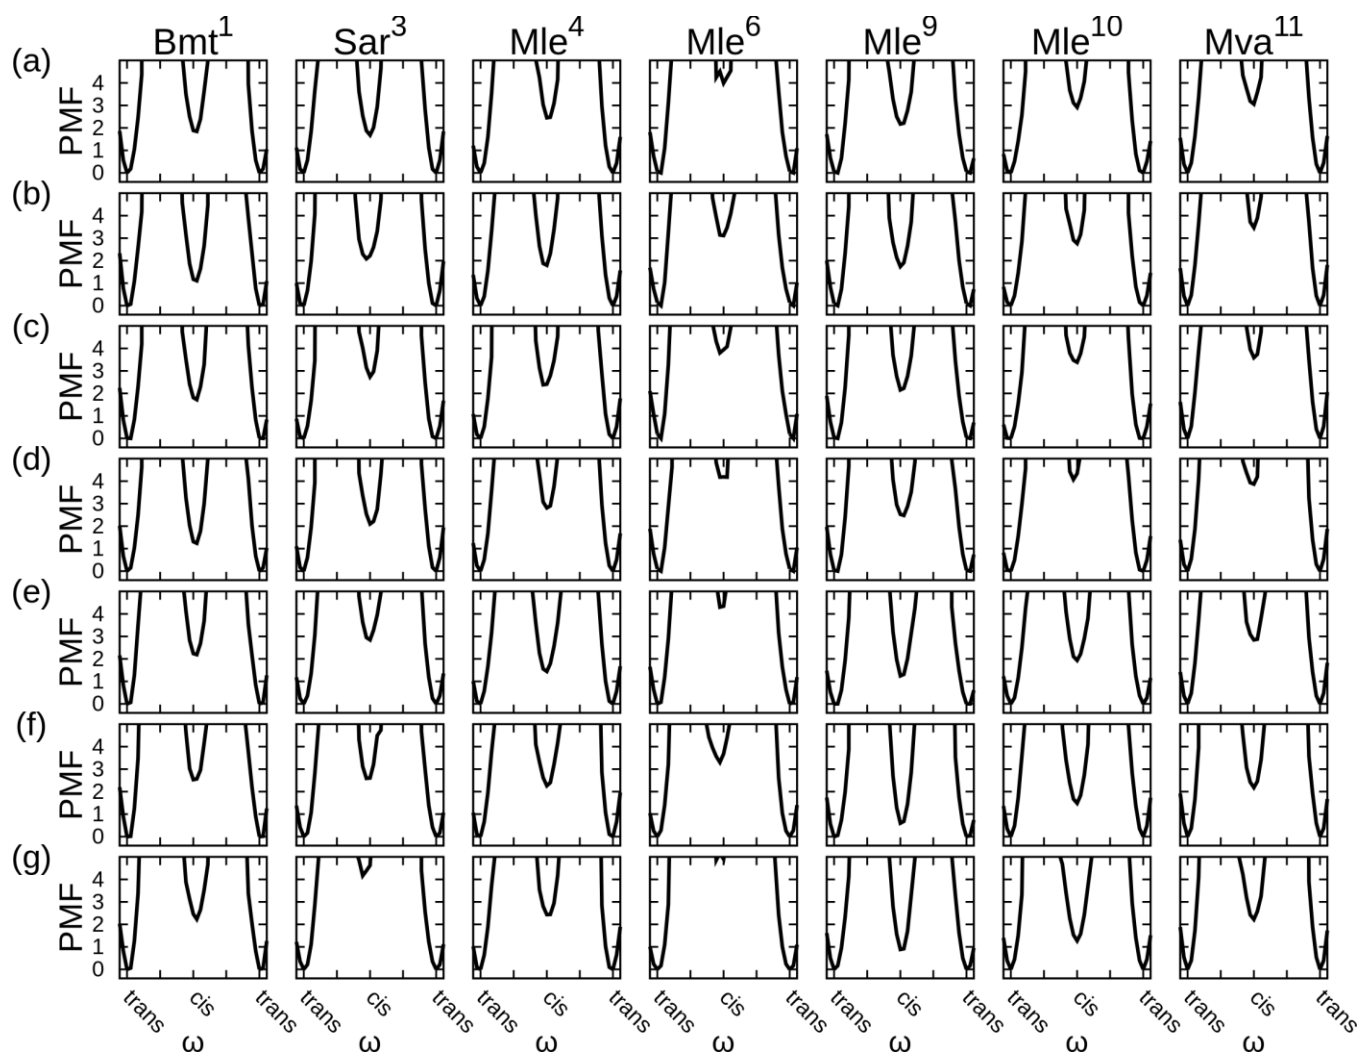

**Figure S8.** Free-energy profile along dihedral angle  $\omega$  using AMBER12:EHT. (a) WAT, (b) DMSO, (c) ACN, (d) MeOH, (e) CHCl<sub>3</sub>, (f) CHX, and (g) HEX. The unit for PMF is kcal/mol.

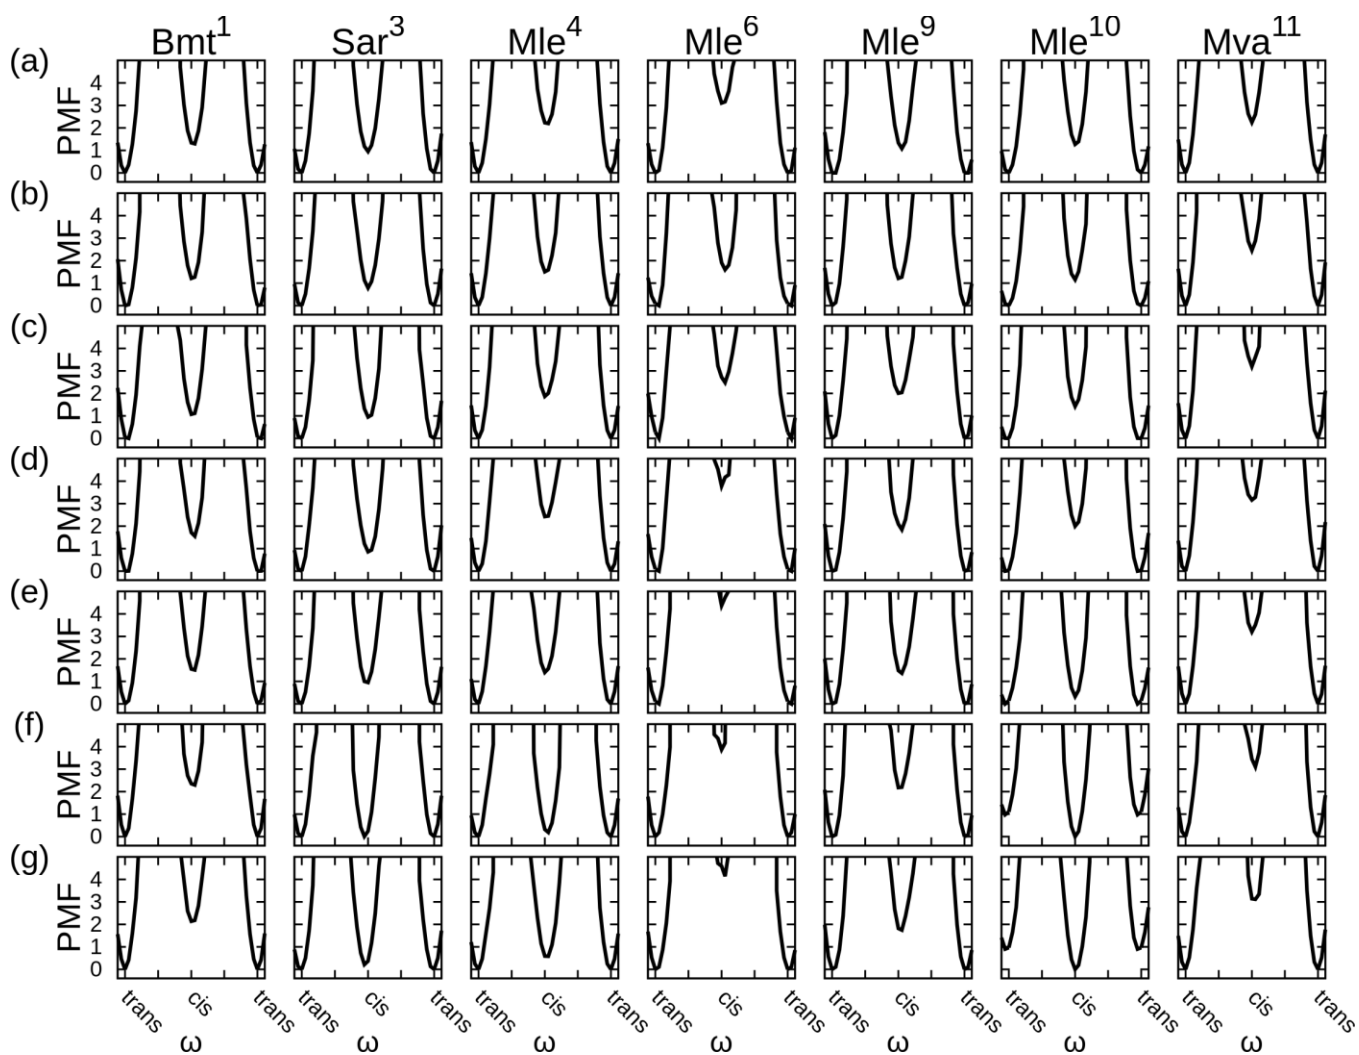

**Figure S9.** Free-energy profile along dihedral angle  $\omega$  using AMBER14:EHT. (a) WAT, (b) DMSO, (c) ACN, (d) MeOH, (e) CHCl<sub>3</sub>, (f) CHX, and (g) HEX. The unit for PMF is kcal/mol.

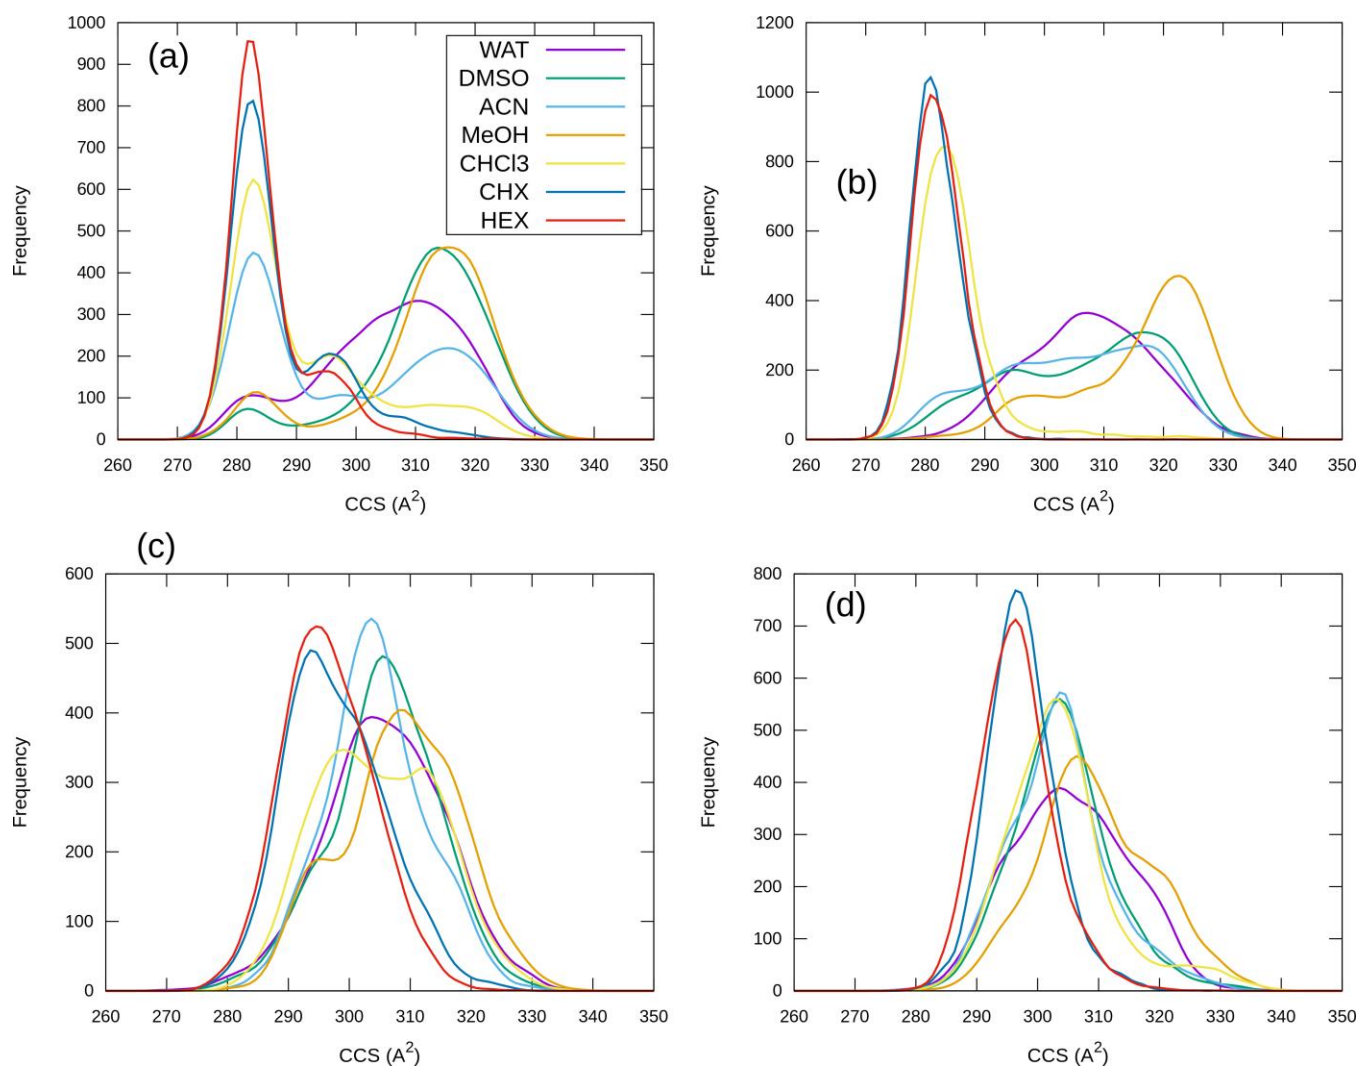

**Figure S10.** Distributions of CoSIMS<sup>10</sup> results of each solvent using (a) ff03, (b) AMBER10:EHT, (c) AMBER12:EHT, and (d) AMBER14:EHT.



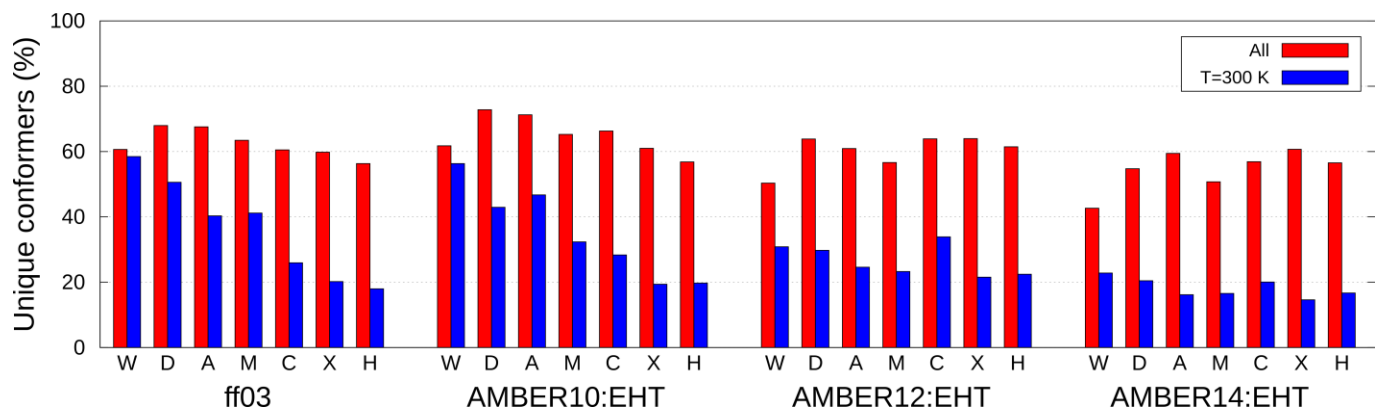

**Figure S11.** Coco-MD<sup>6</sup> like conformer counts. Unique conformer counts from aggregating all trajectories (2.88 million conformers) are plotted red bars, whereas, from the ensemble of T = 300 K (10,000 conformers) are plotted blue bars.

**Table S7.** Upper limit distance in CDCl<sub>3</sub>.

| Index | Atom1   | Atom2   | Distance(Å) | Type         | f1(ppm) | f2(ppm) |
|-------|---------|---------|-------------|--------------|---------|---------|
| 1     | :2@H    | :5@HB   | 3.407       | intercycle   | 2.41    | 7.94    |
| 2     | :2@H    | :5@H    | 3.118       | intercycle   | 7.94    | 7.45    |
| 3     | :3@HA12 | :5@H    | 3.946       | intercycle   | 4.72    | 7.45    |
| 4     | :5@H    | :1@HB   | 3.786       | intercycle   | 7.46    | 3.79    |
| 5     | :6@HA   | :1@HA   | 2.669       | intercycle   | 5.46    | 4.97    |
| 6     | :6@HA   | :1@HD22 | 3.070       | intercycle   | 4.97    | 2.40    |
| 7     | :6@HA   | :1@HD1? | 2.729       | intercycle   | 4.97    | 0.70    |
| 8     | :6@HG   | :1@HD1? | 3.045       | intercycle   | 1.75    | 0.71    |
| 9     | :7@H    | :1@HA   | 2.975       | intercycle   | 7.65    | 5.45    |
| 10    | :8@H    | :6@HB3  | 3.568       | intercycle   | 7.15    | 2.05    |
| 11    | :8@H    | :6@HG   | 3.010       | intercycle   | 7.15    | 1.75    |
| 12    | :10@HA  | :6@HB3  | 2.796       | intercycle   | 5.06    | 2.07    |
| 13    | :2@HA   | :3@HA2? | 2.128       | sequential   | 5.02    | 3.38    |
| 14    | :2@H    | :1@HA   | 2.301       | sequential   | 7.95    | 5.45    |
| 15    | :2@H    | :1@HB   | 2.845       | sequential   | 7.94    | 3.79    |
| 16    | :3@HA12 | :4@HN?  | 2.101       | sequential   | 3.09    | 4.71    |
| 17    | :5@HA   | :6@HN?  | 2.080       | sequential   | 4.64    | 3.24    |
| 18    | :5@H    | :4@HA   | 2.899       | sequential   | 7.46    | 5.32    |
| 19    | :7@H    | :6@HA   | 2.235       | sequential   | 7.65    | 4.97    |
| 20    | :7@H    | :8@H    | 2.976       | sequential   | 7.65    | 7.15    |
| 21    | :8@HA   | :9@HN?  | 2.166       | sequential   | 3.10    | 4.82    |
| 22    | :8@H    | :7@HA   | 2.853       | sequential   | 7.15    | 4.51    |
| 23    | :9@HA   | :10@HA  | 1.830       | sequential   | 5.68    | 5.06    |
| 24    | :9@HA   | :10@HG  | 2.812       | sequential   | 5.68    | 1.48    |
| 25    | :11@HA  | :1@HA2? | 2.093       | sequential   | 5.12    | 3.50    |
| 26    | :1@HA   | :1@HB   | 2.360       | intraresidue | 5.46    | 3.79    |
| 27    | :1@HA   | :1@HD22 | 2.825       | intraresidue | 5.46    | 2.39    |
| 28    | :1@HA   | :1@HD1? | 2.668       | intraresidue | 5.46    | 0.70    |
| 29    | :1@HA   | :1@HA2? | 3.363       | intraresidue | 5.46    | 3.50    |
| 30    | :1@HB   | :1@HD22 | 3.092       | intraresidue | 3.79    | 2.39    |
| 31    | :1@HB   | :1@HD1? | 2.527       | intraresidue | 3.79    | 0.71    |

|    |         |         |       |              |      |      |
|----|---------|---------|-------|--------------|------|------|
| 32 | :1@HB   | :1@HA2? | 2.694 | intraresidue | 3.79 | 3.49 |
| 33 | :1@HD22 | :1@HD1? | 3.463 | intraresidue | 0.70 | 2.39 |
| 34 | :2@HA   | :2@HB2  | 2.655 | intraresidue | 5.02 | 1.71 |
| 35 | :2@HA   | :2@H    | 3.043 | intraresidue | 7.95 | 5.01 |
| 36 | :2@HB2  | :2@H    | 3.717 | intraresidue | 7.95 | 1.71 |
| 37 | :4@HA   | :4@HB2  | 2.508 | intraresidue | 5.32 | 1.98 |
| 38 | :4@HA   | :4@HG   | 3.127 | intraresidue | 5.32 | 1.42 |
| 39 | :5@HA   | :5@HG2? | 2.590 | intraresidue | 4.64 | 1.06 |
| 40 | :5@HB   | :5@HG2? | 2.209 | intraresidue | 2.41 | 1.06 |
| 41 | :5@HG2? | :5@H    | 3.211 | intraresidue | 7.46 | 1.07 |
| 42 | :5@HA   | :5@H    | 3.018 | intraresidue | 4.64 | 7.45 |
| 43 | :5@H    | :5@HB   | 2.643 | intraresidue | 2.41 | 7.46 |
| 44 | :6@HA   | :6@HB2  | 2.659 | intraresidue | 4.97 | 1.38 |
| 45 | :6@HA   | :6@HB3  | 2.909 | intraresidue | 4.97 | 2.04 |
| 46 | :6@HA   | :6@HG   | 2.878 | intraresidue | 4.97 | 1.75 |
| 47 | :6@HB2  | :6@HG   | 2.474 | intraresidue | 2.04 | 1.75 |
| 48 | :6@HB3  | :6@HN?  | 2.584 | intraresidue | 1.38 | 3.24 |
| 49 | :6@HB2  | :6@HN?  | 2.261 | intraresidue | 3.24 | 2.05 |
| 50 | :6@HN?  | :6@HG   | 3.085 | intraresidue | 1.75 | 3.24 |
| 51 | :7@HA   | :7@HB?  | 2.253 | intraresidue | 4.51 | 1.35 |
| 52 | :7@H    | :7@HA   | 3.025 | intraresidue | 7.65 | 4.51 |
| 53 | :7@H    | :7@HB?  | 2.843 | intraresidue | 7.65 | 1.34 |
| 54 | :8@HA   | :8@H    | 2.928 | intraresidue | 7.15 | 4.81 |
| 55 | :9@HA   | :9@HB2  | 3.078 | intraresidue | 5.68 | 2.11 |
| 56 | :9@HA   | :9@HG   | 2.796 | intraresidue | 1.31 | 5.68 |
| 57 | :10@HA  | :10@HG  | 2.827 | intraresidue | 5.06 | 1.49 |

**Table S8.** Upper limit distance in cyclohexane-d12.

| Index | Atom1   | Atom2   | Distance(Å) | Type       | f1(ppm) | f2(ppm) |
|-------|---------|---------|-------------|------------|---------|---------|
| 1     | :1@HA   | :6@HD1? | 3.119       | intercycle | 5.31    | 0.73    |
| 2     | :1@HD23 | :3@HA2? | 3.744       | intercycle | 1.78    | 3.38    |
| 3     | :1@HD23 | :6@HB3  | 3.212       | intercycle | 1.78    | 1.14    |
| 4     | :1@HZ   | :6@HB2  | 3.473       | intercycle | 5.25    | 1.14    |
| 5     | :2@H    | :5@HB   | 3.671       | intercycle | 8.39    | 2.44    |
| 6     | :2@H    | :5@H    | 3.122       | intercycle | 8.39    | 7.17    |
| 7     | :3@HA12 | :5@H    | 3.671       | intercycle | 4.58    | 7.16    |
| 8     | :6@HD1? | :11@HN? | 2.921       | intercycle | 0.73    | 2.63    |
| 9     | :6@HG   | :10@HA  | 4.191       | intercycle | 5.10    | 1.94    |
| 10    | :6@HG   | :11@HN? | 3.324       | intercycle | 1.93    | 2.64    |
| 11    | :7@H    | :1@HA   | 3.144       | intercycle | 7.81    | 5.31    |
| 12    | :7@H    | :11@HB  | 4.253       | intercycle | 7.81    | 2.19    |
| 13    | :7@H    | :11@HN? | 3.246       | intercycle | 7.81    | 2.63    |
| 14    | :8@HA   | :11@HN? | 3.591       | intercycle | 4.72    | 2.62    |
| 15    | :8@H    | :6@HG   | 3.223       | intercycle | 7.47    | 1.93    |
| 16    | :9@HA   | :11@HN? | 3.278       | intercycle | 5.65    | 2.62    |
| 17    | :10@HA  | :6@HD1? | 2.937       | intercycle | 5.10    | 0.73    |
| 18    | :10@HG  | :6@HD1? | 2.965       | intercycle | 1.49    | 0.73    |
| 19    | :11@HB  | :7@HB?  | 2.463       | intercycle | 2.19    | 1.26    |
| 20    | :11@HN? | :7@HB?  | 2.614       | intercycle | 2.62    | 1.26    |
| 21    | :2@HA   | :3@HA2? | 2.196       | sequential | 4.94    | 3.38    |
| 22    | :2@H    | :1@HA   | 2.244       | sequential | 8.39    | 5.31    |
| 23    | :2@H    | :1@HB   | 3.410       | sequential | 8.39    | 3.92    |
| 24    | :3@HA12 | :4@HN?  | 2.179       | sequential | 4.58    | 3.05    |
| 25    | :5@H    | :4@HA   | 2.849       | sequential | 7.17    | 5.37    |
| 26    | :5@H    | :4@HN?  | 2.785       | sequential | 7.17    | 3.06    |
| 27    | :7@H    | :6@HA   | 2.207       | sequential | 7.81    | 5.20    |
| 28    | :7@H    | :6@HG   | 4.103       | sequential | 7.81    | 1.93    |
| 29    | :7@H    | :8@H    | 3.368       | sequential | 7.82    | 7.48    |
| 30    | :8@H    | :7@HA   | 2.645       | sequential | 7.48    | 4.35    |
| 31    | :9@HA   | :10@HA  | 1.945       | sequential | 5.66    | 5.09    |

|    |         |          |       |              |      |      |
|----|---------|----------|-------|--------------|------|------|
| 32 | :9@HA   | :10@HG   | 2.991 | sequential   | 5.67 | 1.49 |
| 33 | :11@HA  | :1@HA2?  | 2.118 | sequential   | 5.00 | 3.47 |
| 34 | :11@HN? | :10@HA   | 2.297 | sequential   | 5.10 | 2.62 |
| 35 | :1@HA   | :1@HB    | 2.781 | intraresidue | 5.31 | 3.92 |
| 36 | :1@HA   | :1@HD22  | 3.312 | intraresidue | 5.30 | 1.80 |
| 37 | :1@HA   | :1@HA2?  | 3.299 | intraresidue | 5.31 | 3.47 |
| 38 | :1@HB   | :1@HD22  | 2.931 | intraresidue | 3.92 | 1.79 |
| 39 | :1@HB   | :1@HA2?  | 2.322 | intraresidue | 3.92 | 3.47 |
| 40 | :1@HZ   | :1@HD22  | 2.664 | intraresidue | 5.24 | 1.79 |
| 41 | :1@CA2? | :1@HD22  | 3.702 | intraresidue | 1.79 | 3.47 |
| 42 | :2@HB2  | :2@H     | 3.770 | intraresidue | 1.66 | 8.39 |
| 43 | :3@HA2? | :3@HA13  | 2.291 | intraresidue | 3.38 | 2.93 |
| 44 | :4@HA   | :4@HN?   | 3.347 | intraresidue | 5.37 | 3.05 |
| 45 | :4@HN?  | :4@HB2   | 2.304 | intraresidue | 3.05 | 1.53 |
| 46 | :4@HN?  | :4@HG    | 2.572 | intraresidue | 3.06 | 1.41 |
| 47 | :5@HA   | :5@HB    | 2.959 | intraresidue | 4.68 | 2.44 |
| 48 | :5@HB   | :5@HG1?  | 2.217 | intraresidue | 2.44 | 0.79 |
| 49 | :5@H    | :5@HB    | 2.661 | intraresidue | 7.17 | 2.45 |
| 50 | :5@H    | :5@HG2?  | 3.284 | intraresidue | 7.17 | 1.01 |
| 51 | :6@HA   | :6@HD1?  | 2.539 | intraresidue | 5.19 | 0.73 |
| 52 | :6@HA   | :6@HG    | 3.038 | intraresidue | 5.19 | 1.92 |
| 53 | :7@HA   | :7@HB?   | 2.284 | intraresidue | 4.35 | 1.26 |
| 54 | :7@H    | :7@HA    | 3.066 | intraresidue | 7.81 | 4.35 |
| 55 | :7@H    | :7@HB?   | 2.897 | intraresidue | 7.81 | 1.26 |
| 56 | :8@HA   | :8@H     | 3.000 | intraresidue | 7.48 | 4.72 |
| 57 | :8@HB?  | :8@H     | 2.868 | intraresidue | 7.48 | 1.17 |
| 58 | :9@HA   | :9@HG    | 3.236 | intraresidue | 5.66 | 1.32 |
| 59 | :10@HA  | :10@HG   | 2.996 | intraresidue | 5.10 | 1.49 |
| 60 | :11@HA  | :11@HG2? | 2.595 | intraresidue | 0.91 | 4.99 |
| 61 | :11@HN? | :11@HB   | 2.096 | intraresidue | 2.62 | 2.19 |

**Table S9.** Upper limit distance in n-hexane-d14.

| Index | Atom1   | Atom2   | Distance(Å) | Type       | f1(ppm) | f2(ppm) |
|-------|---------|---------|-------------|------------|---------|---------|
| 1     | :1@HB   | :3@HA2? | 3.522       | intercycle | 3.92    | 3.38    |
| 2     | :1@HB   | :6@HD1? | 4.289       | intercycle | 3.92    | 0.78    |
| 3     | :1@HD23 | :3@HA2? | 4.377       | intercycle | 1.79    | 3.38    |
| 4     | :1@HD22 | :6@HD1? | 2.888       | intercycle | 1.80    | 0.78    |
| 5     | :1@HZ   | :6@HN?  | 4.403       | intercycle | 5.27    | 3.23    |
| 6     | :1@HZ   | :6@HD1? | 3.729       | intercycle | 5.28    | 0.78    |
| 7     | :2@H    | :5@HB   | 3.285       | intercycle | 8.29    | 2.47    |
| 8     | :2@H    | :5@H    | 3.315       | intercycle | 8.30    | 7.19    |
| 9     | :2@H    | :6@HA   | 3.771       | intercycle | 8.30    | 5.20    |
| 10    | :2@H    | :7@H    | 4.103       | intercycle | 8.29    | 7.73    |
| 11    | :3@HA12 | :5@H    | 3.620       | intercycle | 4.61    | 7.19    |
| 12    | :6@HA   | :1@HD22 | 3.695       | intercycle | 5.19    | 1.80    |
| 13    | :6@HA   | :4@HA   | 4.488       | intercycle | 5.19    | 4.67    |
| 14    | :6@HA   | :11@HN? | 3.709       | intercycle | 5.18    | 2.65    |
| 15    | :6@HG   | :10@HA  | 4.003       | intercycle | 1.91    | 5.10    |
| 16    | :6@HG   | :11@HN? | 3.356       | intercycle | 1.91    | 2.65    |
| 17    | :6@HN?  | :1@HH?  | 3.637       | intercycle | 3.23    | 1.59    |
| 18    | :7@HA   | :5@HG1? | 2.983       | intercycle | 4.38    | 0.83    |
| 19    | :7@HA   | :11@HN? | 4.272       | intercycle | 4.37    | 2.65    |
| 20    | :7@H    | :1@HA   | 3.169       | intercycle | 7.74    | 5.37    |
| 21    | :7@H    | :11@HB  | 4.053       | intercycle | 7.75    | 2.20    |
| 22    | :7@H    | :11@HN? | 2.928       | intercycle | 7.74    | 2.65    |
| 23    | :8@HA   | :11@HN? | 3.362       | intercycle | 4.75    | 2.65    |
| 24    | :8@H    | :6@HB3  | 3.812       | intercycle | 7.42    | 2.10    |
| 25    | :8@H    | :6@HG   | 3.027       | intercycle | 7.42    | 1.91    |
| 26    | :8@H    | :11@HN? | 3.579       | intercycle | 7.41    | 2.66    |
| 27    | :9@HA   | :11@HN? | 3.223       | intercycle | 5.69    | 2.66    |
| 28    | :9@HN?  | :11@HN? | 2.916       | intercycle | 3.20    | 2.65    |
| 29    | :10@HA  | :6@HD1? | 2.853       | intercycle | 5.10    | 0.78    |
| 30    | :11@HB  | :7@HB?  | 2.698       | intercycle | 2.21    | 1.28    |
| 31    | :1@CA2? | :11@HN? | 3.827       | sequential | 3.48    | 2.65    |

|    |         |         |       |              |      |      |
|----|---------|---------|-------|--------------|------|------|
| 32 | :2@HA   | :1@HA2? | 3.844 | sequential   | 4.98 | 3.49 |
| 33 | :2@HA   | :3@HA2? | 2.168 | sequential   | 4.98 | 3.39 |
| 34 | :2@H    | :1@HA   | 2.243 | sequential   | 8.29 | 5.37 |
| 35 | :2@H    | :1@HB   | 3.182 | sequential   | 8.29 | 3.92 |
| 36 | :2@H    | :3@HA2? | 4.159 | sequential   | 8.29 | 3.39 |
| 37 | :3@HA13 | :4@HA   | 4.329 | sequential   | 2.94 | 5.39 |
| 38 | :3@HA12 | :4@HN?  | 2.164 | sequential   | 4.61 | 3.06 |
| 39 | :5@HA   | :6@HN?  | 2.094 | sequential   | 4.67 | 3.23 |
| 40 | :5@HB   | :4@HN?  | 3.896 | sequential   | 2.48 | 3.06 |
| 41 | :5@H    | :4@HN?  | 2.703 | sequential   | 7.19 | 3.06 |
| 42 | :6@HN?  | :5@HB   | 3.523 | sequential   | 3.22 | 2.47 |
| 43 | :7@HA   | :6@HN?  | 4.036 | sequential   | 4.37 | 3.23 |
| 44 | :7@H    | :6@HA   | 2.207 | sequential   | 7.74 | 5.19 |
| 45 | :7@H    | :6@HG   | 3.701 | sequential   | 7.74 | 1.91 |
| 46 | :7@H    | :8@H    | 3.558 | sequential   | 7.75 | 7.42 |
| 47 | :8@HA   | :9@HN?  | 2.132 | sequential   | 4.76 | 3.20 |
| 48 | :8@H    | :7@HA   | 2.637 | sequential   | 7.42 | 4.37 |
| 49 | :8@H    | :7@HB?  | 4.299 | sequential   | 7.41 | 1.29 |
| 50 | :9@HA   | :10@HA  | 1.880 | sequential   | 5.69 | 5.10 |
| 51 | :10@HA  | :9@HN?  | 4.379 | sequential   | 5.10 | 3.20 |
| 52 | :10@HN? | :9@HA   | 4.110 | sequential   | 2.61 | 5.70 |
| 53 | :11@HA  | :1@HA2? | 2.083 | sequential   | 5.04 | 3.49 |
| 54 | :11@HN? | :10@HA  | 2.230 | sequential   | 2.66 | 5.10 |
| 55 | :1@HB   | :1@HD22 | 3.065 | intraresidue | 3.92 | 1.81 |
| 56 | :1@HB   | :1@HD1? | 2.406 | intraresidue | 3.92 | 0.87 |
| 57 | :1@HB   | :1@HG1  | 3.740 | intraresidue | 3.92 | 2.27 |
| 58 | :1@HB   | :1@HA2? | 2.358 | intraresidue | 3.92 | 3.49 |
| 59 | :1@HZ   | :1@HD22 | 2.561 | intraresidue | 5.28 | 1.79 |
| 60 | :1@HG1  | :1@HD22 | 3.498 | intraresidue | 2.28 | 1.79 |
| 61 | :1@HG1  | :1@HA2? | 4.247 | intraresidue | 2.27 | 3.48 |
| 62 | :1@CA2? | :1@HD22 | 3.931 | intraresidue | 3.48 | 1.80 |
| 63 | :3@HA2? | :3@HA12 | 3.713 | intraresidue | 4.60 | 3.39 |
| 64 | :4@HN?  | :4@HB2  | 3.957 | intraresidue | 2.07 | 3.06 |
| 65 | :4@HN?  | :4@HG   | 2.824 | intraresidue | 3.06 | 1.43 |

|    |         |         |       |              |      |      |
|----|---------|---------|-------|--------------|------|------|
| 66 | :5@H    | :5@HB   | 2.527 | intraresidue | 7.19 | 2.48 |
| 67 | :6@HA   | :6@HB2  | 2.572 | intraresidue | 5.19 | 1.20 |
| 68 | :6@HA   | :6@HD1? | 2.427 | intraresidue | 5.19 | 0.78 |
| 69 | :6@HA   | :6@HG   | 2.988 | intraresidue | 5.19 | 1.91 |
| 70 | :6@HA   | :6@HN?  | 3.351 | intraresidue | 5.19 | 3.23 |
| 71 | :6@HN?  | :6@HG   | 3.691 | intraresidue | 3.23 | 1.91 |
| 72 | :7@H    | :7@HA   | 3.123 | intraresidue | 7.74 | 4.38 |
| 73 | :7@H    | :7@HB?  | 2.526 | intraresidue | 7.75 | 1.28 |
| 74 | :8@HB?  | :8@H    | 2.593 | intraresidue | 1.18 | 7.42 |
| 75 | :9@HA   | :9@HG   | 3.259 | intraresidue | 5.70 | 1.34 |
| 76 | :9@HA   | :9@HN?  | 3.389 | intraresidue | 5.70 | 3.19 |
| 77 | :9@HN?  | :9@HG   | 2.842 | intraresidue | 3.20 | 1.34 |
| 78 | :10@HN? | :10@HA  | 3.190 | intraresidue | 2.61 | 5.10 |
| 79 | :11@HN? | :11@HB  | 2.218 | intraresidue | 2.66 | 2.20 |

**Table S10.** Amide NH Shift comparison

| Alias            | ID   | HEX-d14 |        | CHX-d12 |        | CDCl <sub>3</sub> |        |
|------------------|------|---------|--------|---------|--------|-------------------|--------|
|                  |      | ppm     | J (Hz) | ppm     | J (Hz) | ppm               | J (Hz) |
| Abu <sup>2</sup> | :2@H | 8.3     | 9.6    | 8.39    | 9.8    | 7.95              | 9.7    |
| Ala <sup>7</sup> | :7@H | 7.75    | 7.1    | 7.81    | 7.1    | 7.67              | 7.5    |
| Dal <sup>8</sup> | :8@H | 7.42    | 7.3    | 7.47    | 7.3    | 7.16              | 8.4    |
| Val <sup>5</sup> | :5@H | 7.199   | 8.9    | 7.17    | 9.0    | 7.47              | 7.9    |



**Table S11.** RMSD of C $\alpha$  between the top 10 lowest cNviol conformers obtained from the ff03 and AMBER10:EHT in CHCl<sub>3</sub>.

|       |     | ff03 |      |      |      |      |      |      |      |      |      | 10EHT |      |      |      |      |      |      |      |      |      |
|-------|-----|------|------|------|------|------|------|------|------|------|------|-------|------|------|------|------|------|------|------|------|------|
|       |     | S1   | S2   | S3   | S4   | S5   | S6   | S7   | S8   | S9   | S10  | S1    | S2   | S3   | S4   | S5   | S6   | S7   | S8   | S9   | S10  |
| ff03  | S1  | 0.00 |      |      |      |      |      |      |      |      |      |       |      |      |      |      |      |      |      |      |      |
|       | S2  | 0.31 | 0.00 |      |      |      |      |      |      |      |      |       |      |      |      |      |      |      |      |      |      |
|       | S3  | 0.81 | 0.64 | 0.00 |      |      |      |      |      |      |      |       |      |      |      |      |      |      |      |      |      |
|       | S4  | 0.41 | 0.30 | 0.75 | 0.00 |      |      |      |      |      |      |       |      |      |      |      |      |      |      |      |      |
|       | S5  | 0.37 | 0.39 | 0.73 | 0.51 | 0.00 |      |      |      |      |      |       |      |      |      |      |      |      |      |      |      |
|       | S6  | 0.33 | 0.26 | 0.68 | 0.24 | 0.39 | 0.00 |      |      |      |      |       |      |      |      |      |      |      |      |      |      |
|       | S7  | 0.51 | 0.34 | 0.64 | 0.33 | 0.48 | 0.34 | 0.00 |      |      |      |       |      |      |      |      |      |      |      |      |      |
|       | S8  | 0.47 | 0.33 | 0.76 | 0.28 | 0.65 | 0.35 | 0.42 | 0.00 |      |      |       |      |      |      |      |      |      |      |      |      |
|       | S9  | 0.43 | 0.33 | 0.76 | 0.35 | 0.45 | 0.37 | 0.27 | 0.37 | 0.00 |      |       |      |      |      |      |      |      |      |      |      |
|       | S10 | 0.26 | 0.22 | 0.60 | 0.37 | 0.33 | 0.28 | 0.37 | 0.44 | 0.38 | 0.00 |       |      |      |      |      |      |      |      |      |      |
| 10EHT | S1  | 0.84 | 0.71 | 0.82 | 0.58 | 0.95 | 0.70 | 0.68 | 0.60 | 0.79 | 0.75 | 0.00  |      |      |      |      |      |      |      |      |      |
|       | S2  | 0.59 | 0.51 | 0.90 | 0.44 | 0.54 | 0.40 | 0.50 | 0.57 | 0.53 | 0.58 | 0.89  | 0.00 |      |      |      |      |      |      |      |      |
|       | S3  | 0.51 | 0.40 | 0.73 | 0.24 | 0.50 | 0.29 | 0.33 | 0.42 | 0.42 | 0.42 | 0.56  | 0.47 | 0.00 |      |      |      |      |      |      |      |
|       | S4  | 0.77 | 0.69 | 0.99 | 0.74 | 0.66 | 0.64 | 0.74 | 0.86 | 0.81 | 0.76 | 1.16  | 0.50 | 0.74 | 0.00 |      |      |      |      |      |      |
|       | S5  | 0.67 | 0.58 | 0.81 | 0.55 | 0.81 | 0.60 | 0.62 | 0.54 | 0.68 | 0.60 | 0.42  | 0.87 | 0.51 | 1.07 | 0.00 |      |      |      |      |      |
|       | S6  | 0.76 | 0.64 | 0.58 | 0.56 | 0.77 | 0.55 | 0.55 | 0.59 | 0.67 | 0.59 | 0.53  | 0.79 | 0.48 | 1.04 | 0.53 | 0.00 |      |      |      |      |
|       | S7  | 0.89 | 0.75 | 0.62 | 0.69 | 0.80 | 0.67 | 0.64 | 0.74 | 0.74 | 0.71 | 0.68  | 0.85 | 0.56 | 1.09 | 0.70 | 0.29 | 0.00 |      |      |      |
|       | S8  | 0.72 | 0.67 | 0.81 | 0.72 | 0.81 | 0.73 | 0.77 | 0.74 | 0.80 | 0.66 | 0.59  | 1.00 | 0.66 | 1.17 | 0.40 | 0.66 | 0.77 | 0.00 |      |      |
|       | S9  | 0.68 | 0.59 | 0.81 | 0.54 | 0.75 | 0.58 | 0.63 | 0.56 | 0.67 | 0.61 | 0.49  | 0.81 | 0.46 | 1.04 | 0.31 | 0.55 | 0.61 | 0.45 | 0.00 |      |
|       | S10 | 0.44 | 0.41 | 0.86 | 0.42 | 0.45 | 0.31 | 0.50 | 0.52 | 0.48 | 0.46 | 0.92  | 0.35 | 0.46 | 0.45 | 0.80 | 0.78 | 0.88 | 0.92 | 0.79 | 0.00 |

Unit in angstrom. The darkest red is set at 1.17.

**Table S12.** RMSD of C $\alpha$  between the top 10 lowest cNviol conformers obtained from the ff03 and AMBER10:EHT in CHX.

|       |     | ff03 |      |      |      |      |      |      |      |      |      | 10EHT |      |      |      |      |      |      |      |      |      |
|-------|-----|------|------|------|------|------|------|------|------|------|------|-------|------|------|------|------|------|------|------|------|------|
|       |     | S1   | S2   | S3   | S4   | S5   | S6   | S7   | S8   | S9   | S10  | S1    | S2   | S3   | S4   | S5   | S6   | S7   | S8   | S9   | S10  |
| ff03  | S1  | 0.00 |      |      |      |      |      |      |      |      |      |       |      |      |      |      |      |      |      |      |      |
|       | S2  | 0.31 | 0.00 |      |      |      |      |      |      |      |      |       |      |      |      |      |      |      |      |      |      |
|       | S3  | 0.39 | 0.30 | 0.00 |      |      |      |      |      |      |      |       |      |      |      |      |      |      |      |      |      |
|       | S4  | 0.33 | 0.33 | 0.38 | 0.00 |      |      |      |      |      |      |       |      |      |      |      |      |      |      |      |      |
|       | S5  | 0.40 | 0.32 | 0.38 | 0.52 | 0.00 |      |      |      |      |      |       |      |      |      |      |      |      |      |      |      |
|       | S6  | 0.44 | 0.41 | 0.32 | 0.38 | 0.53 | 0.00 |      |      |      |      |       |      |      |      |      |      |      |      |      |      |
|       | S7  | 0.37 | 0.30 | 0.25 | 0.40 | 0.42 | 0.31 | 0.00 |      |      |      |       |      |      |      |      |      |      |      |      |      |
|       | S8  | 0.44 | 0.35 | 0.32 | 0.56 | 0.26 | 0.44 | 0.35 | 0.00 |      |      |       |      |      |      |      |      |      |      |      |      |
|       | S9  | 0.42 | 0.47 | 0.41 | 0.57 | 0.32 | 0.55 | 0.47 | 0.39 | 0.00 |      |       |      |      |      |      |      |      |      |      |      |
|       | S10 | 0.45 | 0.40 | 0.33 | 0.55 | 0.37 | 0.36 | 0.26 | 0.26 | 0.44 | 0.00 |       |      |      |      |      |      |      |      |      |      |
| 10EHT | S1  | 0.35 | 0.37 | 0.34 | 0.28 | 0.53 | 0.28 | 0.28 | 0.50 | 0.49 | 0.42 | 0.00  |      |      |      |      |      |      |      |      |      |
|       | S2  | 0.43 | 0.51 | 0.54 | 0.28 | 0.71 | 0.52 | 0.53 | 0.72 | 0.71 | 0.69 | 0.36  | 0.00 |      |      |      |      |      |      |      |      |
|       | S3  | 0.48 | 0.52 | 0.39 | 0.54 | 0.52 | 0.37 | 0.33 | 0.42 | 0.48 | 0.29 | 0.37  | 0.62 | 0.00 |      |      |      |      |      |      |      |
|       | S4  | 0.47 | 0.58 | 0.58 | 0.36 | 0.73 | 0.51 | 0.58 | 0.74 | 0.70 | 0.69 | 0.37  | 0.26 | 0.56 | 0.00 |      |      |      |      |      |      |
|       | S5  | 0.37 | 0.32 | 0.37 | 0.48 | 0.31 | 0.51 | 0.37 | 0.35 | 0.35 | 0.37 | 0.41  | 0.60 | 0.42 | 0.60 | 0.00 |      |      |      |      |      |
|       | S6  | 0.44 | 0.38 | 0.22 | 0.47 | 0.46 | 0.39 | 0.36 | 0.37 | 0.44 | 0.41 | 0.41  | 0.56 | 0.47 | 0.64 | 0.43 | 0.00 |      |      |      |      |
|       | S7  | 0.40 | 0.41 | 0.37 | 0.39 | 0.49 | 0.37 | 0.32 | 0.49 | 0.49 | 0.36 | 0.26  | 0.49 | 0.31 | 0.43 | 0.36 | 0.46 | 0.00 |      |      |      |
|       | S8  | 0.55 | 0.43 | 0.38 | 0.61 | 0.47 | 0.42 | 0.30 | 0.31 | 0.56 | 0.28 | 0.49  | 0.74 | 0.43 | 0.79 | 0.44 | 0.45 | 0.50 | 0.00 |      |      |
|       | S9  | 0.48 | 0.46 | 0.41 | 0.56 | 0.48 | 0.37 | 0.32 | 0.35 | 0.56 | 0.33 | 0.47  | 0.70 | 0.41 | 0.73 | 0.51 | 0.51 | 0.51 | 0.25 | 0.00 |      |
|       | S10 | 0.49 | 0.49 | 0.31 | 0.52 | 0.55 | 0.44 | 0.34 | 0.45 | 0.45 | 0.42 | 0.36  | 0.56 | 0.36 | 0.59 | 0.43 | 0.29 | 0.42 | 0.47 | 0.52 | 0.00 |

Unit in angstrom. The darkest red is set at 1.17.

**Table S13.** RMSD of C $\alpha$  between the top 10 lowest cNviol conformers obtained from the ff03 and AMBER10:EHT in HEX.

|       |     | ff03 |      |      |      |      |      |      |      |      |      | 10EHT |      |      |      |      |      |      |      |      |      |
|-------|-----|------|------|------|------|------|------|------|------|------|------|-------|------|------|------|------|------|------|------|------|------|
|       |     | S1   | S2   | S3   | S4   | S5   | S6   | S7   | S8   | S9   | S10  | S1    | S2   | S3   | S4   | S5   | S6   | S7   | S8   | S9   | S10  |
| ff03  | S1  | 0.00 |      |      |      |      |      |      |      |      |      |       |      |      |      |      |      |      |      |      |      |
|       | S2  | 0.27 | 0.00 |      |      |      |      |      |      |      |      |       |      |      |      |      |      |      |      |      |      |
|       | S3  | 0.34 | 0.28 | 0.00 |      |      |      |      |      |      |      |       |      |      |      |      |      |      |      |      |      |
|       | S4  | 0.46 | 0.50 | 0.49 | 0.00 |      |      |      |      |      |      |       |      |      |      |      |      |      |      |      |      |
|       | S5  | 0.53 | 0.48 | 0.46 | 0.31 | 0.00 |      |      |      |      |      |       |      |      |      |      |      |      |      |      |      |
|       | S6  | 0.27 | 0.26 | 0.31 | 0.46 | 0.52 | 0.00 |      |      |      |      |       |      |      |      |      |      |      |      |      |      |
|       | S7  | 0.67 | 0.63 | 0.60 | 0.59 | 0.41 | 0.67 | 0.00 |      |      |      |       |      |      |      |      |      |      |      |      |      |
|       | S8  | 0.45 | 0.41 | 0.44 | 0.33 | 0.27 | 0.46 | 0.40 | 0.00 |      |      |       |      |      |      |      |      |      |      |      |      |
|       | S9  | 0.45 | 0.33 | 0.31 | 0.49 | 0.51 | 0.35 | 0.67 | 0.42 | 0.00 |      |       |      |      |      |      |      |      |      |      |      |
|       | S10 | 0.53 | 0.41 | 0.36 | 0.47 | 0.35 | 0.51 | 0.52 | 0.34 | 0.36 | 0.00 |       |      |      |      |      |      |      |      |      |      |
| 10EHT | S1  | 0.39 | 0.41 | 0.43 | 0.32 | 0.32 | 0.41 | 0.50 | 0.36 | 0.52 | 0.49 | 0.00  |      |      |      |      |      |      |      |      |      |
|       | S2  | 0.35 | 0.32 | 0.30 | 0.32 | 0.38 | 0.28 | 0.55 | 0.29 | 0.29 | 0.38 | 0.33  | 0.00 |      |      |      |      |      |      |      |      |
|       | S3  | 0.46 | 0.49 | 0.50 | 0.34 | 0.29 | 0.51 | 0.43 | 0.38 | 0.60 | 0.48 | 0.22  | 0.42 | 0.00 |      |      |      |      |      |      |      |
|       | S4  | 0.33 | 0.32 | 0.31 | 0.29 | 0.40 | 0.30 | 0.63 | 0.35 | 0.29 | 0.38 | 0.33  | 0.18 | 0.43 | 0.00 |      |      |      |      |      |      |
|       | S5  | 0.54 | 0.47 | 0.40 | 0.36 | 0.41 | 0.48 | 0.60 | 0.37 | 0.33 | 0.33 | 0.45  | 0.29 | 0.48 | 0.28 | 0.00 |      |      |      |      |      |
|       | S6  | 0.41 | 0.37 | 0.28 | 0.40 | 0.46 | 0.37 | 0.64 | 0.42 | 0.29 | 0.36 | 0.39  | 0.23 | 0.46 | 0.22 | 0.24 | 0.00 |      |      |      |      |
|       | S7  | 0.24 | 0.25 | 0.28 | 0.40 | 0.46 | 0.23 | 0.59 | 0.35 | 0.32 | 0.41 | 0.37  | 0.25 | 0.43 | 0.27 | 0.40 | 0.30 | 0.00 |      |      |      |
|       | S8  | 0.53 | 0.48 | 0.37 | 0.34 | 0.36 | 0.49 | 0.56 | 0.37 | 0.37 | 0.32 | 0.39  | 0.31 | 0.43 | 0.29 | 0.21 | 0.26 | 0.41 | 0.00 |      |      |
|       | S9  | 0.27 | 0.36 | 0.51 | 0.53 | 0.60 | 0.39 | 0.76 | 0.51 | 0.57 | 0.62 | 0.50  | 0.46 | 0.56 | 0.44 | 0.65 | 0.56 | 0.38 | 0.68 | 0.00 |      |
|       | S10 | 0.32 | 0.32 | 0.30 | 0.42 | 0.37 | 0.36 | 0.47 | 0.37 | 0.49 | 0.40 | 0.29  | 0.34 | 0.31 | 0.37 | 0.48 | 0.41 | 0.30 | 0.43 | 0.43 | 0.00 |

Unit in angstrom. The darkest red is set at 1.17.

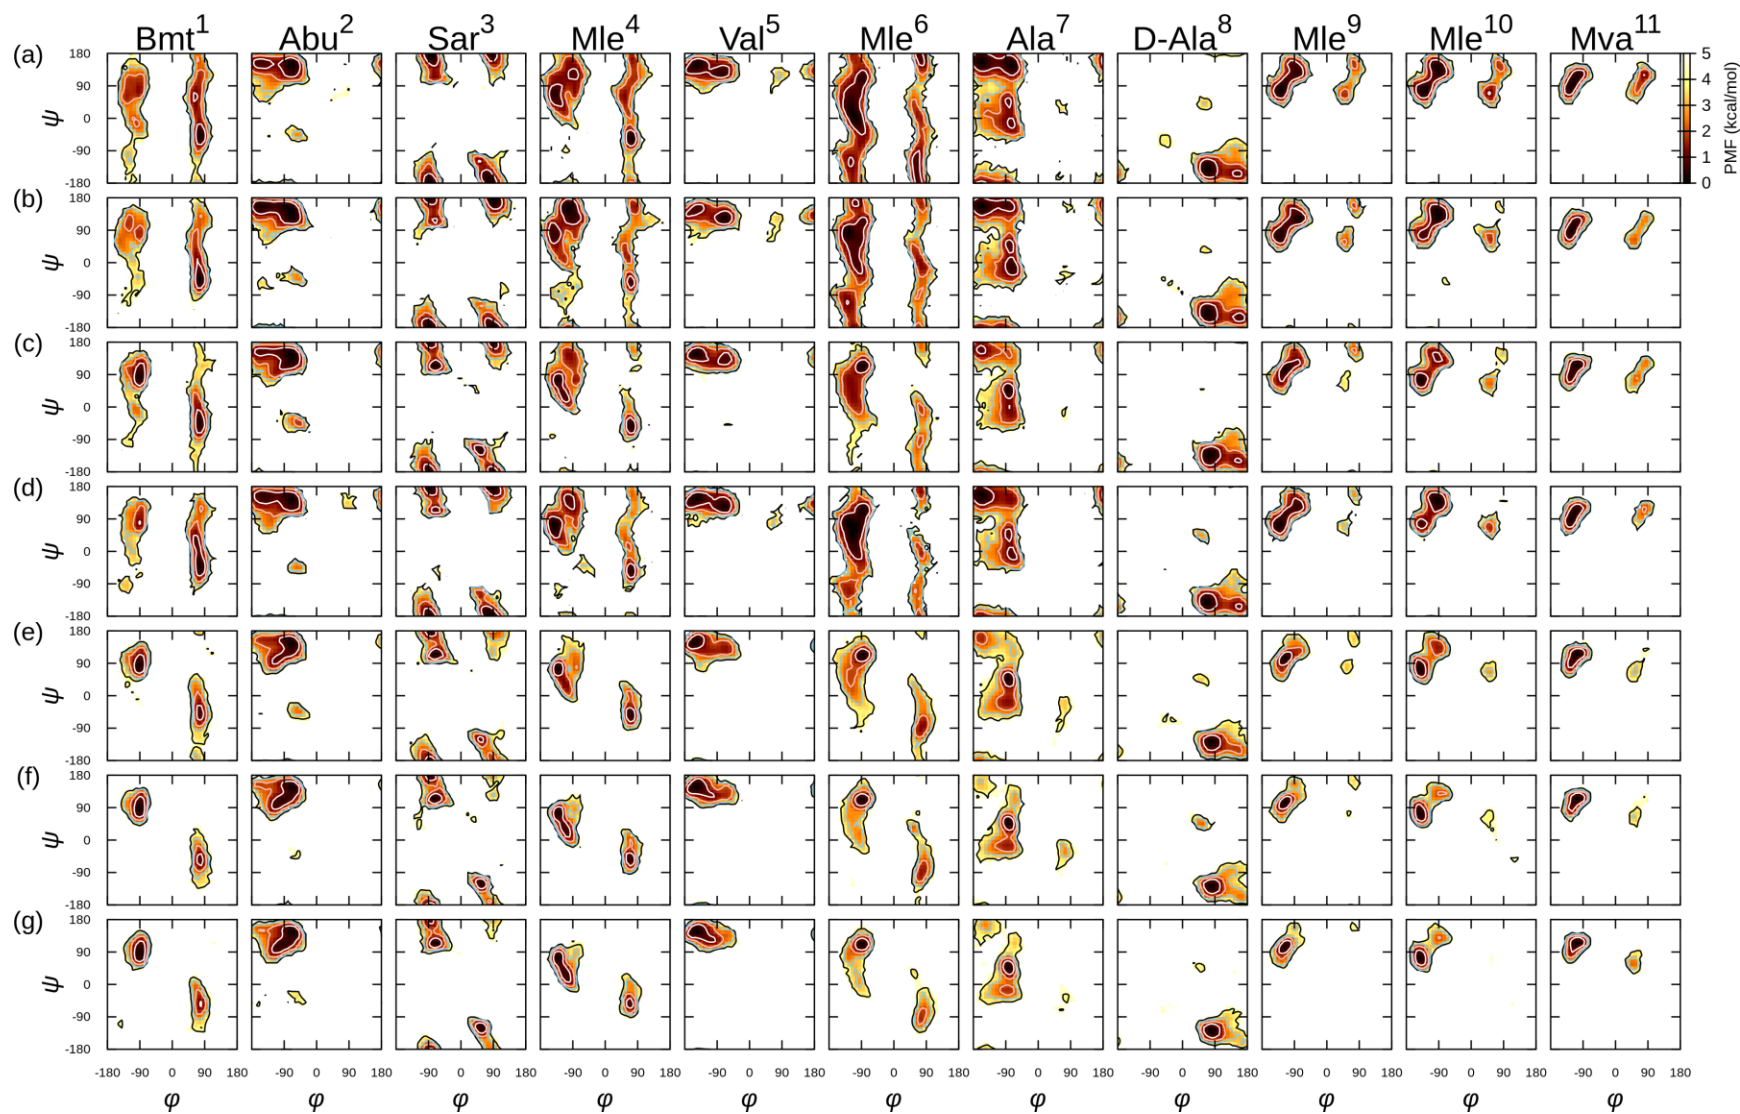

**Figure S12.** FELs of the backbone ( $\phi, \psi$ ) at  $T = 300$  K using ff03 in (a) WAT, (b) DMSO, (c) ACN, (d) in MeOH, (e)  $\text{CHCl}_3$ , (f) CHX, and (g) HEX. The contour lines of the PMF = 1.0, 2.0, 3.0, and 4.0 kcal/mol are represented by the white, pink, sky-blue, and black lines, respectively.

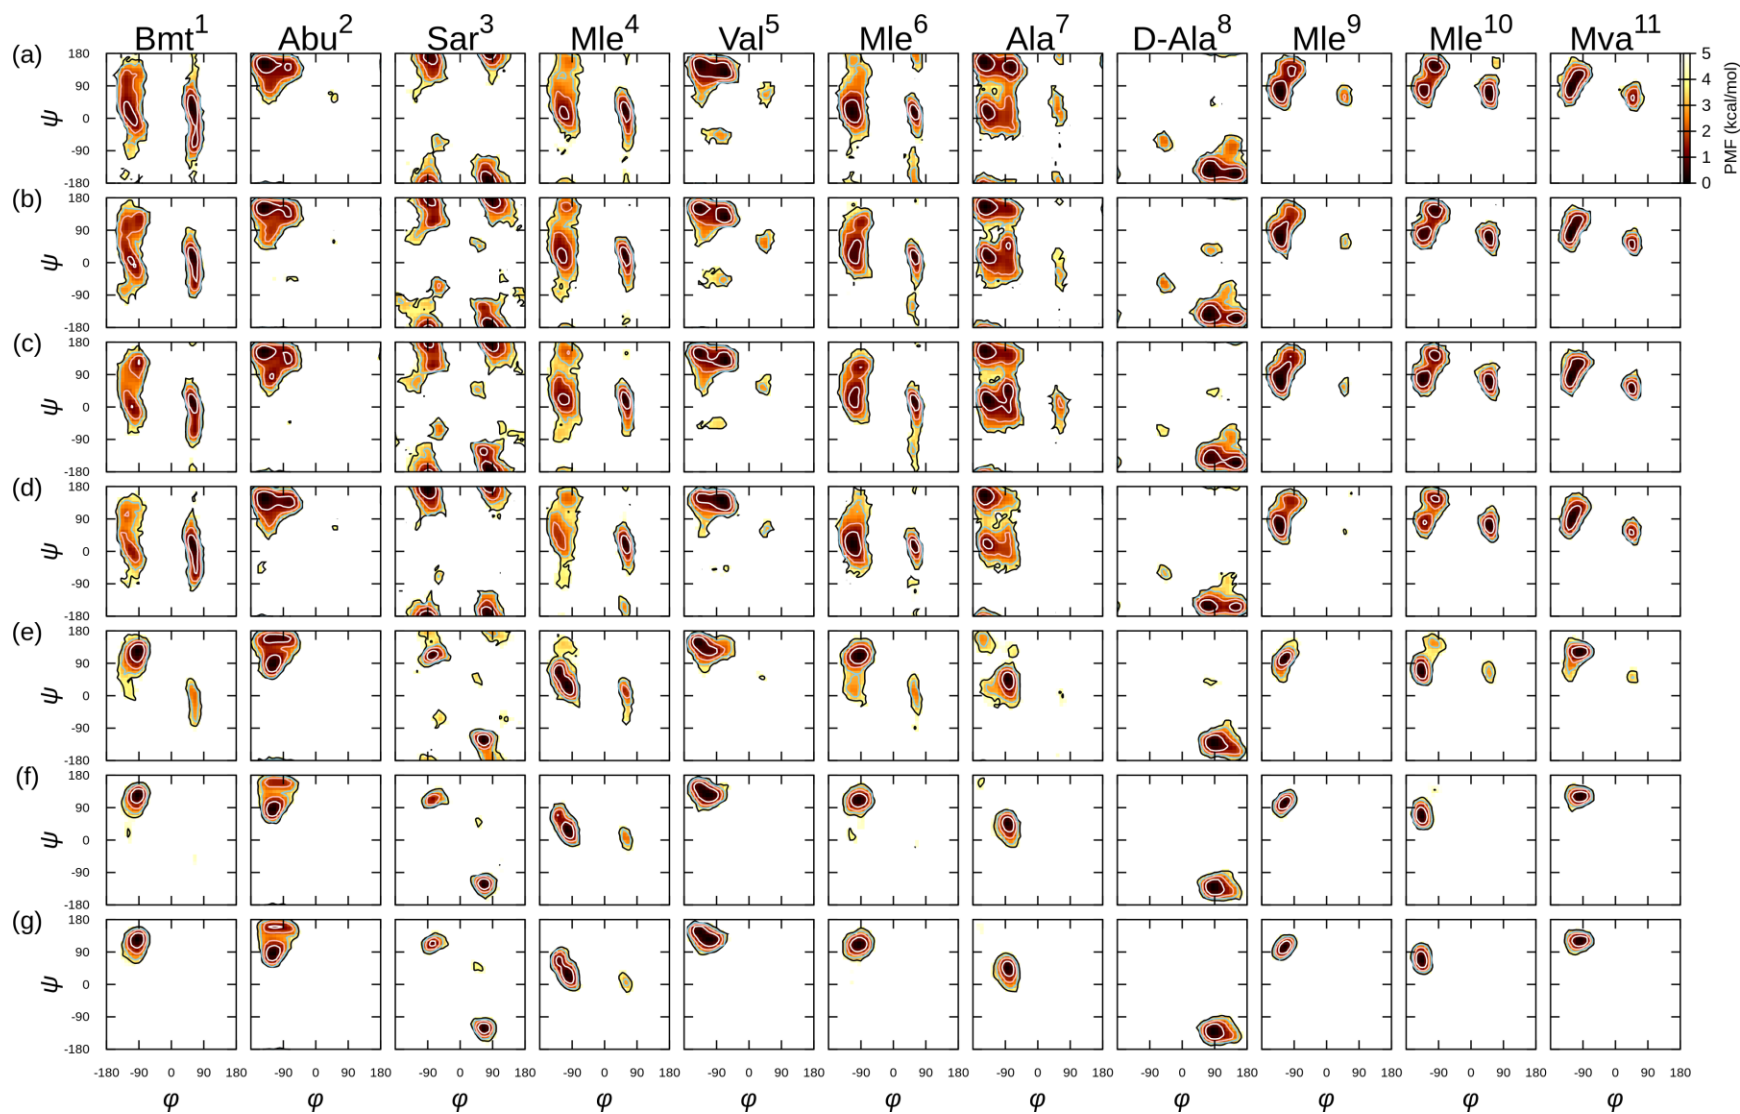

**Figure S13.** FELs of the backbone ( $\phi, \psi$ ) at  $T = 300$  K using AMBER10:EHT in (a) WAT, (b) DMSO, (c) ACN, (d) in MeOH, (e)  $\text{CHCl}_3$ , (f) CHX, and (g) HEX. The contour lines of the PMF = 1.0, 2.0, 3.0, and 4.0 kcal/mol are represented by the white, pink, sky-blue, and black lines, respectively.

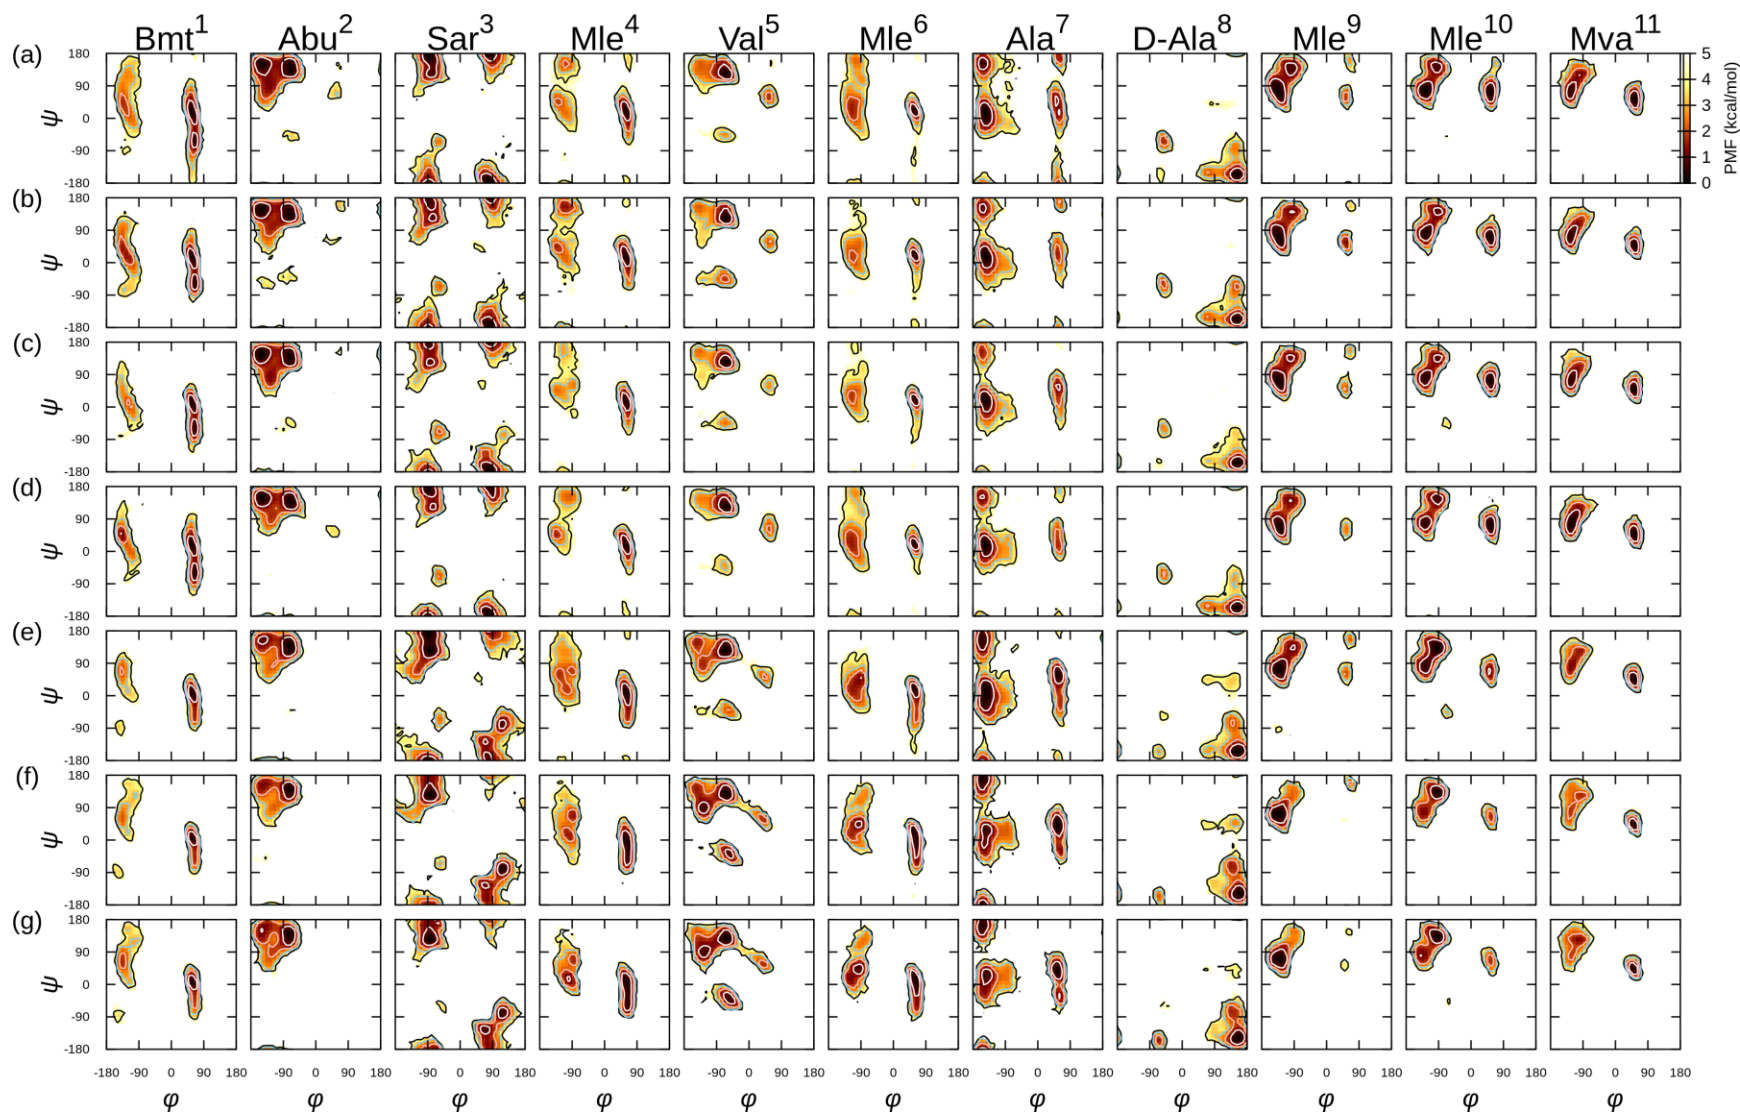

**Figure S14.** FELs of the backbone ( $\phi, \psi$ ) at  $T = 300$  K using AMBER12:EHT in (a) WAT, (b) DMSO, (c) ACN, (d) in MeOH, (e)  $\text{CHCl}_3$ , (f) CHX, and (g) HEX. The contour lines of the PMF = 1.0, 2.0, 3.0, and 4.0 kcal/mol are represented by the white, pink, sky-blue, and black lines, respectively.



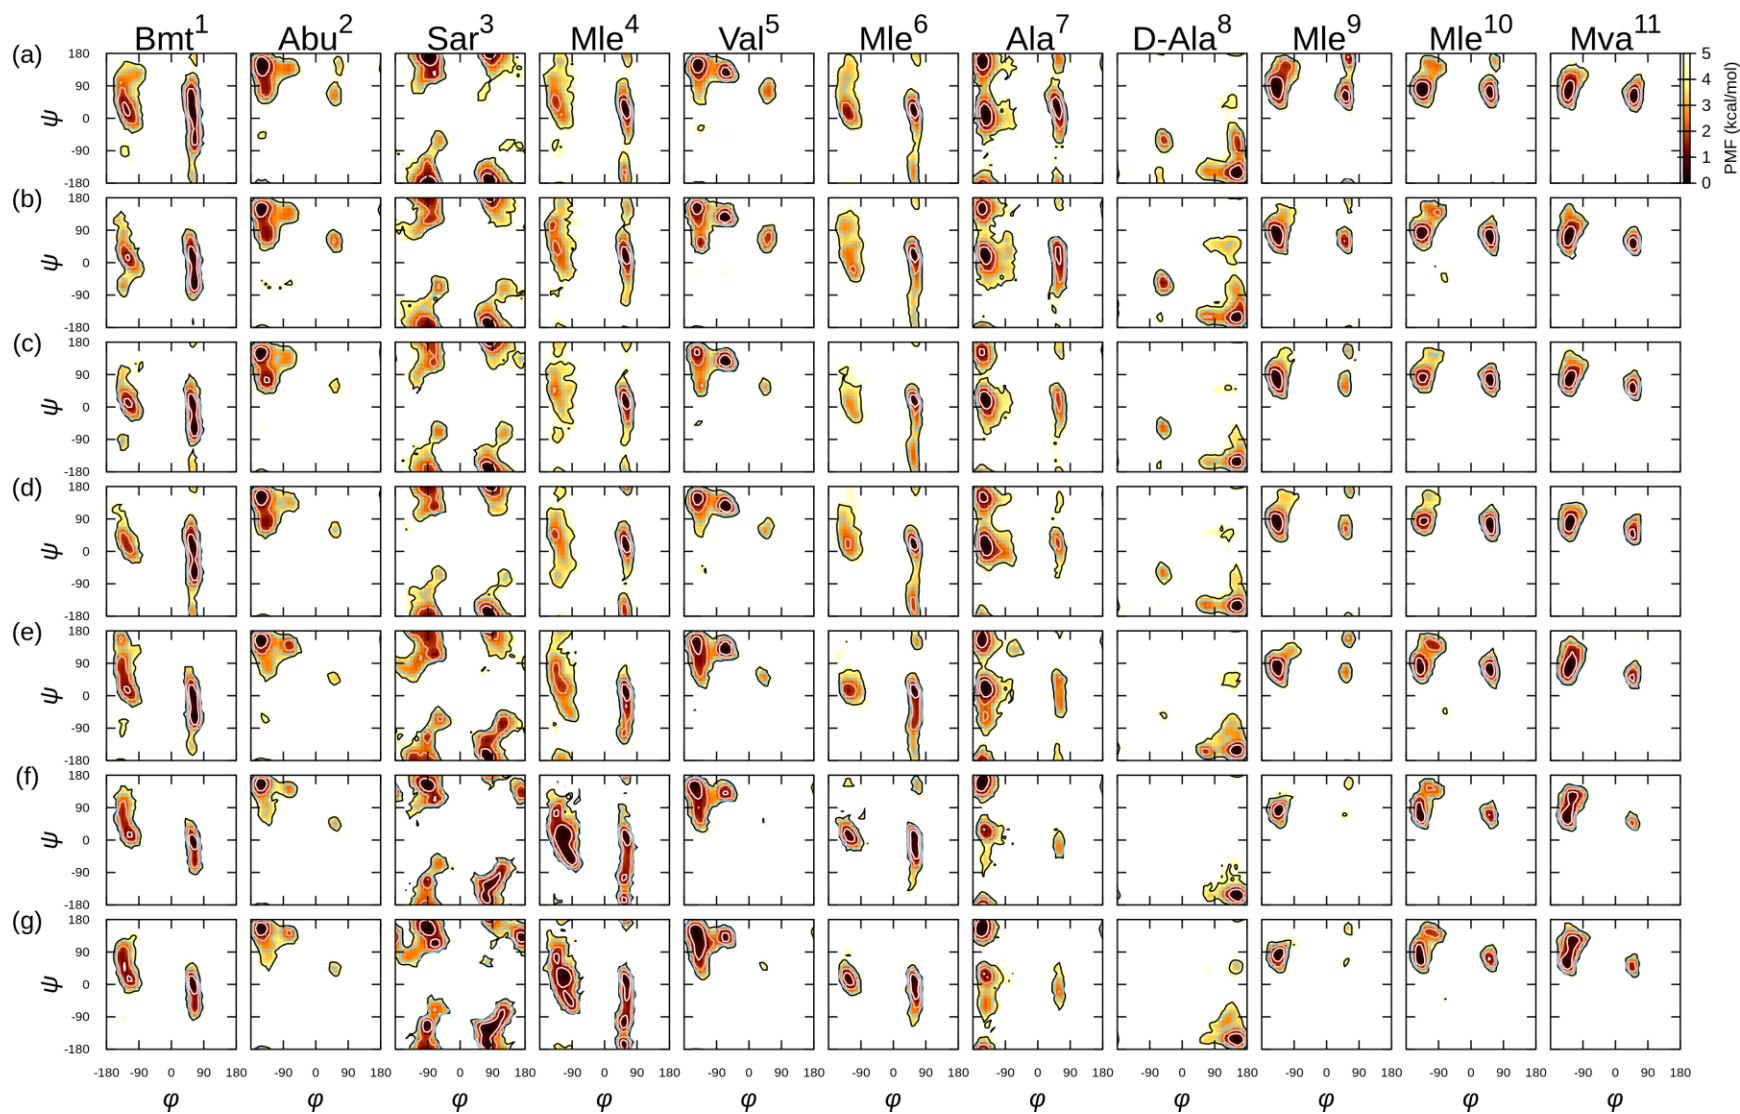

**Figure S15.** FELs of the backbone ( $\phi, \psi$ ) at  $T = 300$  K using AMBER14:EHT in (a) WAT, (b) DMSO, (c) ACN, (d) in MeOH, (e)  $\text{CHCl}_3$ , (f) CHX, and (g) HEX. The contour lines of the PMF = 1.0, 2.0, 3.0, and 4.0 kcal/mol are represented by the white, pink, sky-blue, and black lines, respectively.

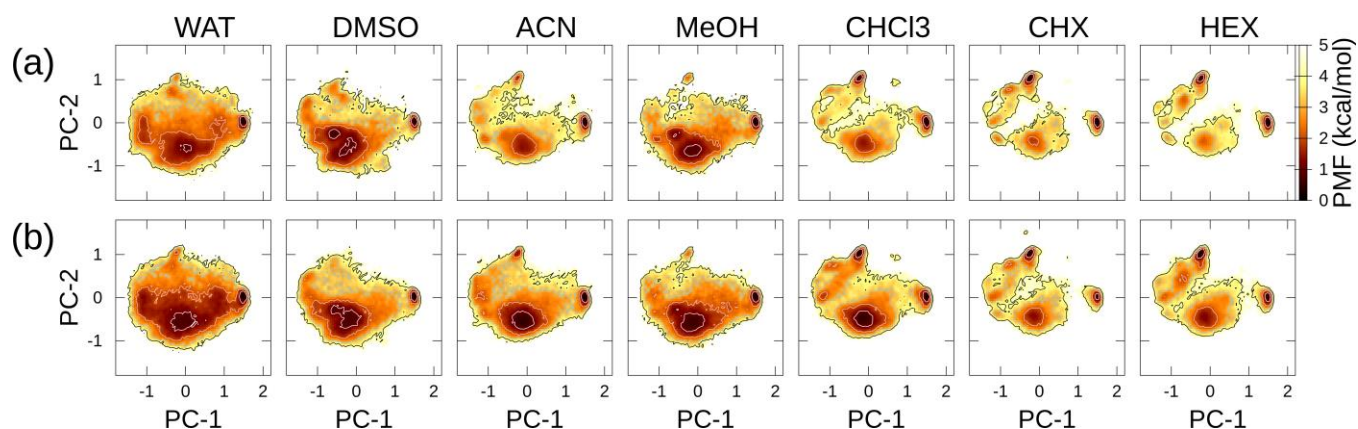

**Figure S16.** PCA of FELs along the PC-1 and PC-2 axes in each solvent using ff03. (a) at  $T = 400$  K, and (b)  $T = 500$  K. The contour lines of the PMF = 1.0, 2.0, 3.0, and 4.0 kcal/mol are represented by the white, pink, sky-blue, and black lines, respectively.

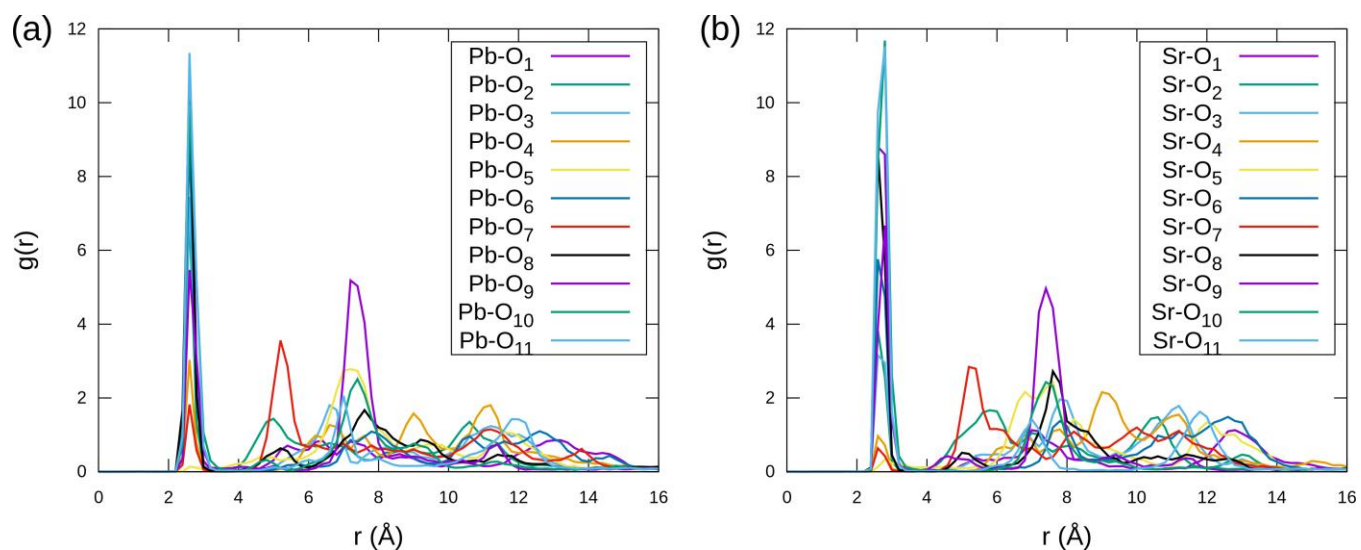

**Figure S17.** Radial distribution functions between metal ion and carbonyl oxygens. (a)  $\text{Pb}^{2+}$  and (b)  $\text{Sr}^{2+}$ .



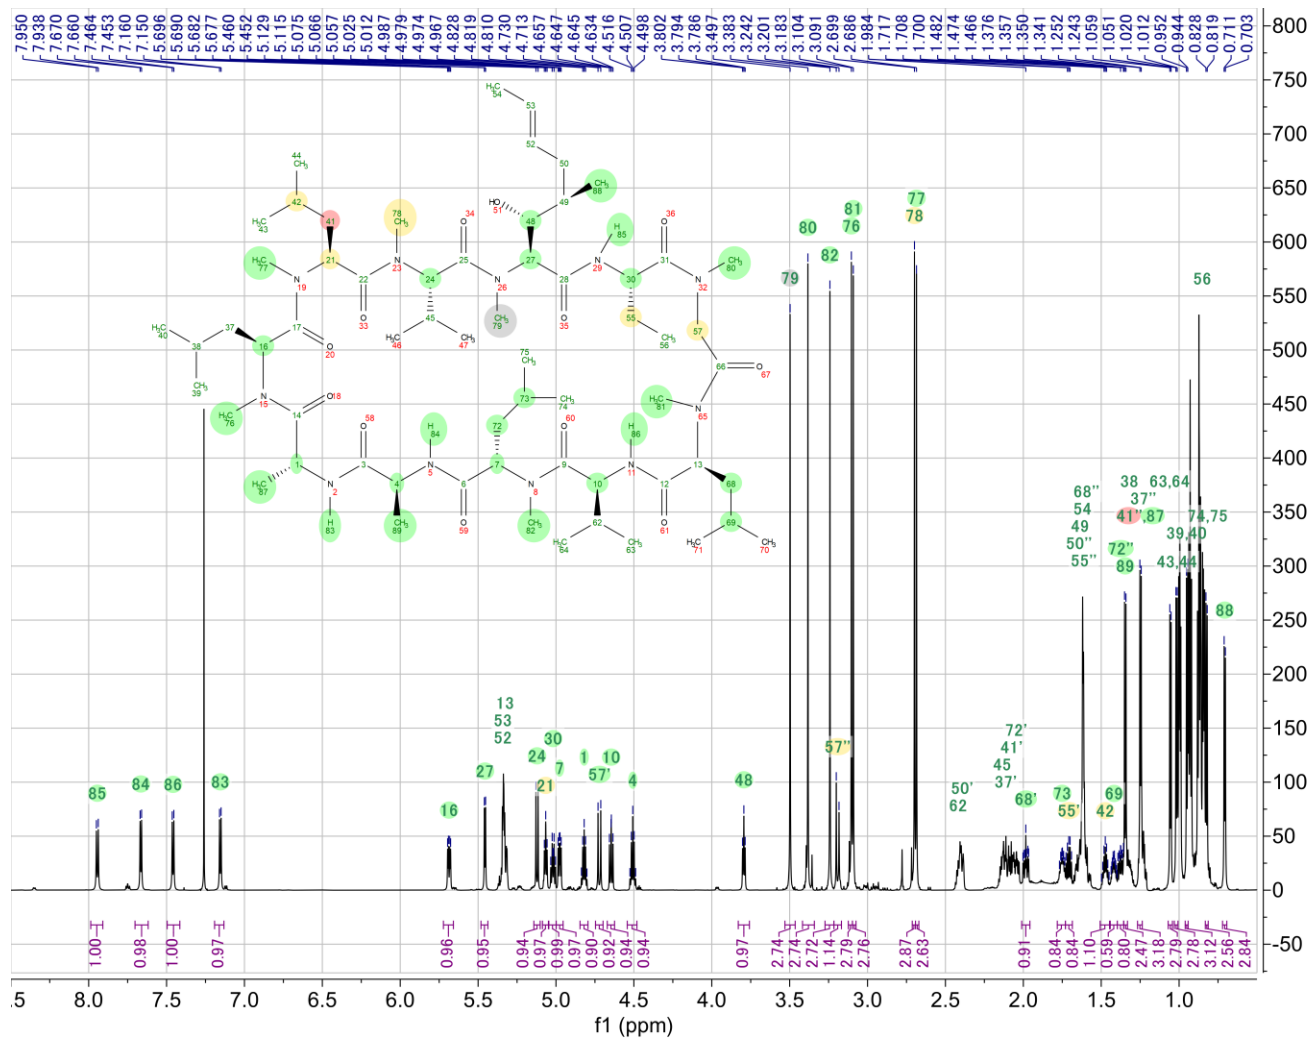

**Figure S18.** NMR Spectra of CsA in  $\text{CDCl}_3$ .  $^1\text{H}$  NMR (800 MHz,  $\text{CDCl}_3$ )  $\delta$  7.94 (d,  $J = 9.7$  Hz, 1H), 7.67 (d,  $J = 7.5$  Hz, 1H), 7.46 (d,  $J = 8.4$  Hz, 1H), 7.15 (d,  $J = 7.9$  Hz, 1H), 5.69 (dd,  $J = 11.0, 4.4$  Hz, 1H), 5.46 (d,  $J = 6.2$  Hz, 1H), 5.12 (d,  $J = 10.9$  Hz, 1H), 5.07 (t,  $J = 7.1$  Hz, 1H), 5.02 (dt,  $J = 9.7, 7.4$  Hz, 1H), 4.98 (dd,  $J = 9.9, 5.9$  Hz, 1H), 4.82 (p,  $J = 7.0$  Hz, 1H), 4.72 (d,  $J = 14.0$  Hz, 1H), 4.65 (dd,  $J = 9.8, 8.3$  Hz, 1H), 4.51 (p,  $J = 7.3$  Hz, 1H), 3.79 (t,  $J = 6.7$  Hz, 1H), 3.50 (s, 3H), 3.38 (s, 3H), 3.24 (s, 3H), 3.19 (d,  $J = 14.1$  Hz, 1H), 3.10 (s, 3H), 3.09 (s, 3H), 2.70 (s, 3H), 2.69 (s, 3H), 2.45 – 2.35 (m, 2H), 2.17 – 2.02 (m, 4H), 1.98 (ddd,  $J = 14.6, 10.5, 4.0$  Hz, 1H), 1.75 (dq,  $J = 8.6, 6.2$  Hz, 1H), 1.71 (dt,  $J = 14.0, 7.1$  Hz, 1H), 1.68 – 1.56 (m, 7H), 1.47 (hept,  $J = 6.5$  Hz, 1H), 1.42 (ddp,  $J = 9.6, 6.7, 3.3$  Hz, 1H), 1.37 (ddd,  $J = 13.5, 9.2, 6.1$  Hz, 1H), 1.36 – 1.29 (m, 3H), 1.25 (d,  $J = 6.8$  Hz, 3H), 1.06 (d,  $J = 6.5$  Hz, 3H), 1.02 (d,  $J = 6.6$  Hz, 3H), 1.00 (dd,  $J = 6.7, 4.5$  Hz, 6H), 0.95 (d,  $J = 6.7$  Hz, 3H), 0.93 (t,  $J = 7.2$  Hz, 6H), 0.90 – 0.83 (m, 14H), 0.82 (d,  $J = 6.6$  Hz, 3H), 0.71 (d,  $J = 6.4$  Hz, 3H).

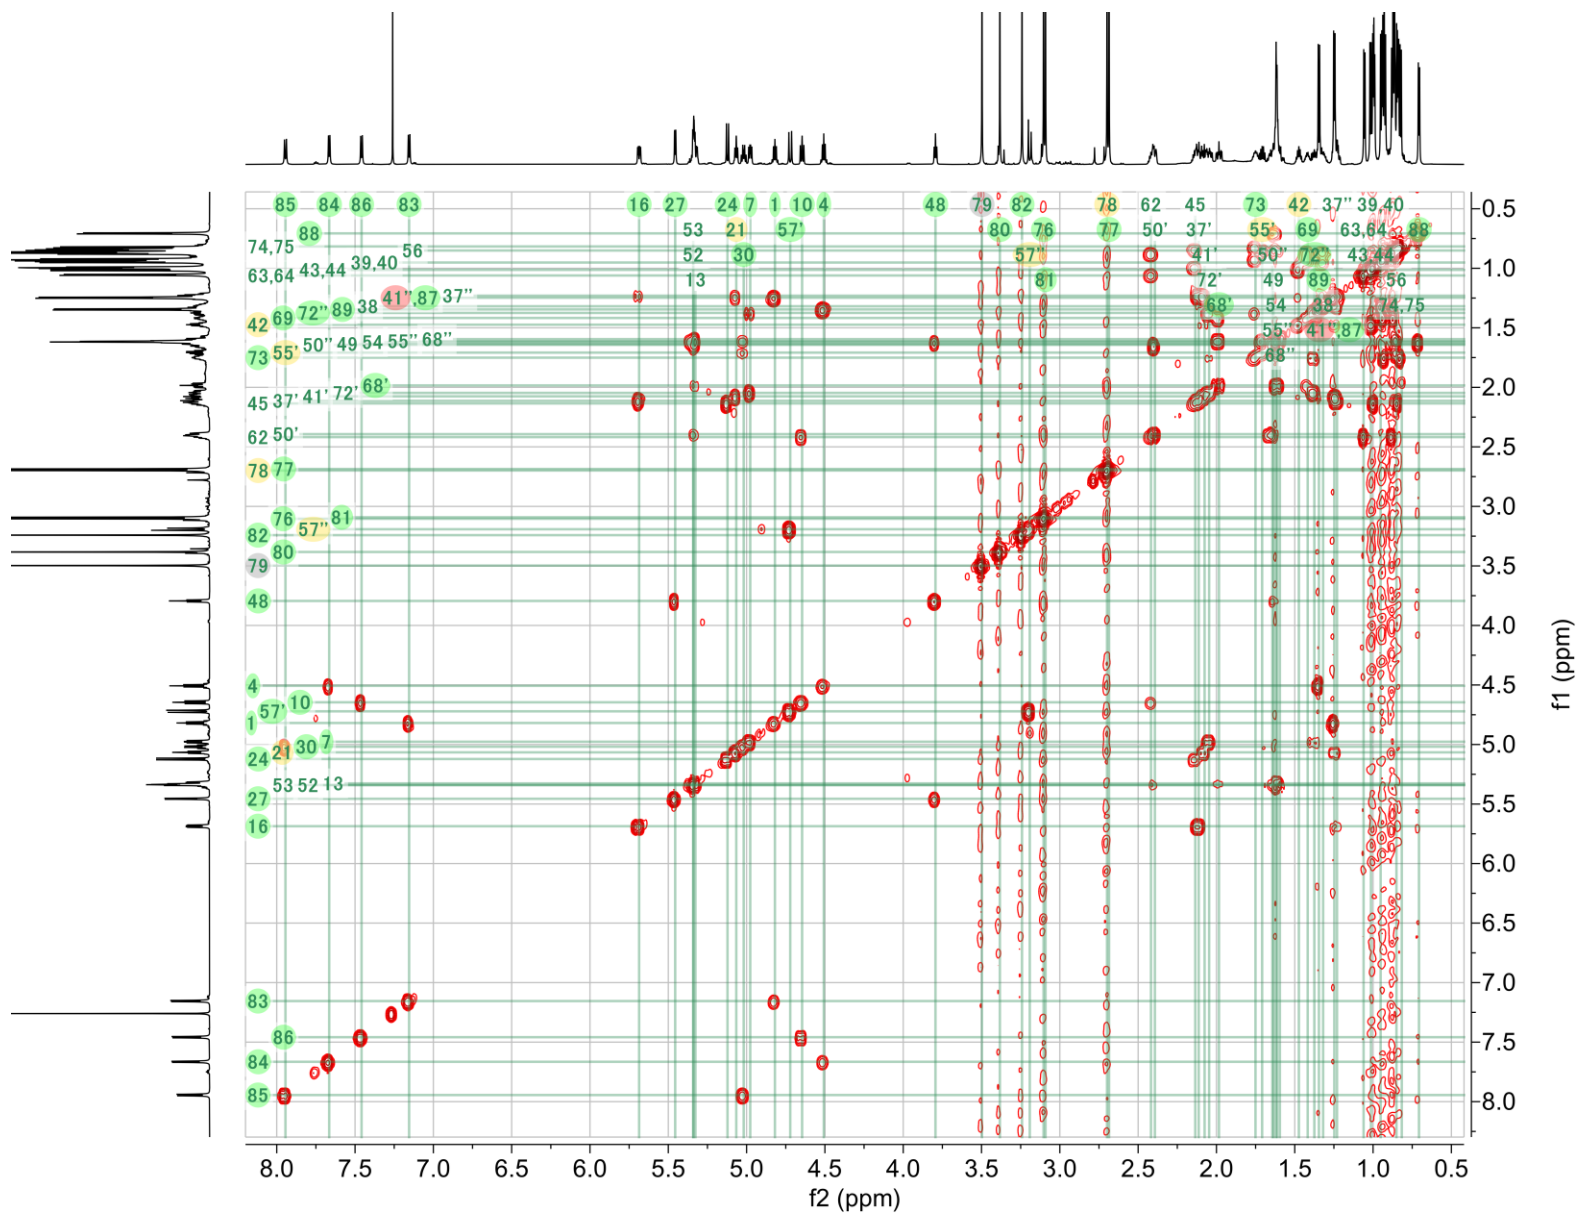

Figure S19. COSY Spectra of CsA in CDCl<sub>3</sub>.









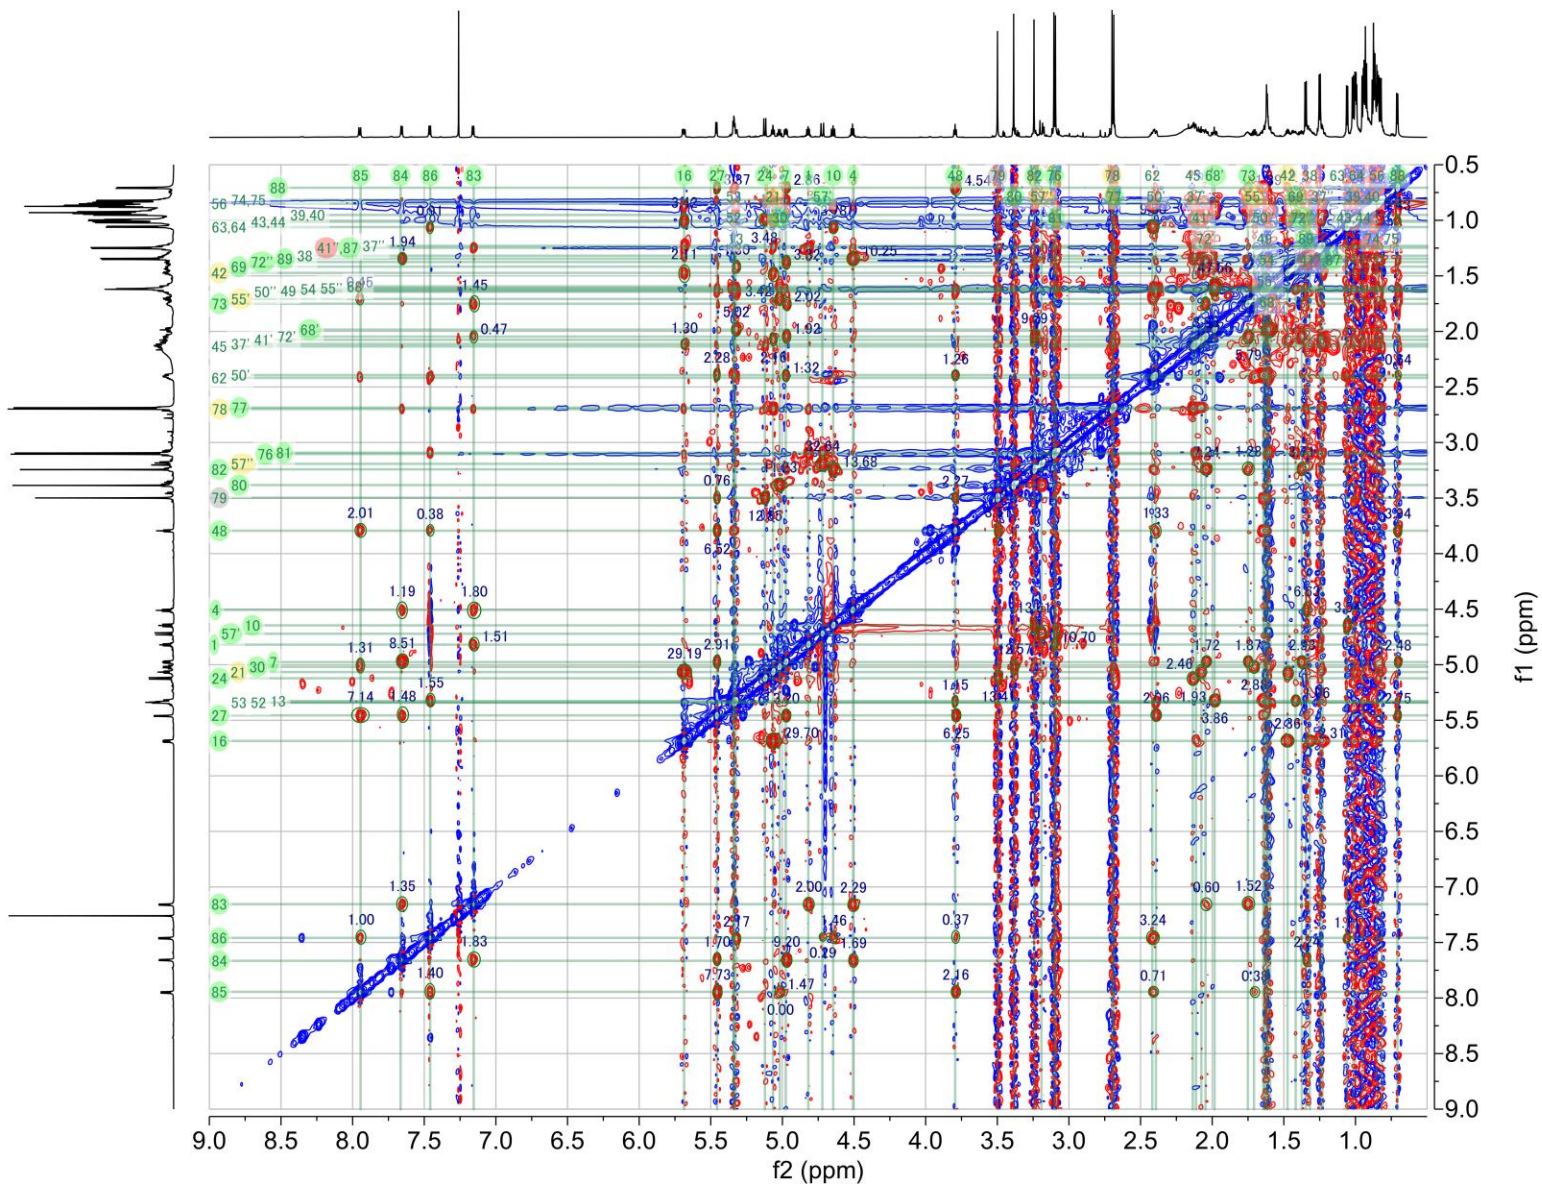

Figure S23. ROESY Spectra of CsA in CDCl<sub>3</sub>.

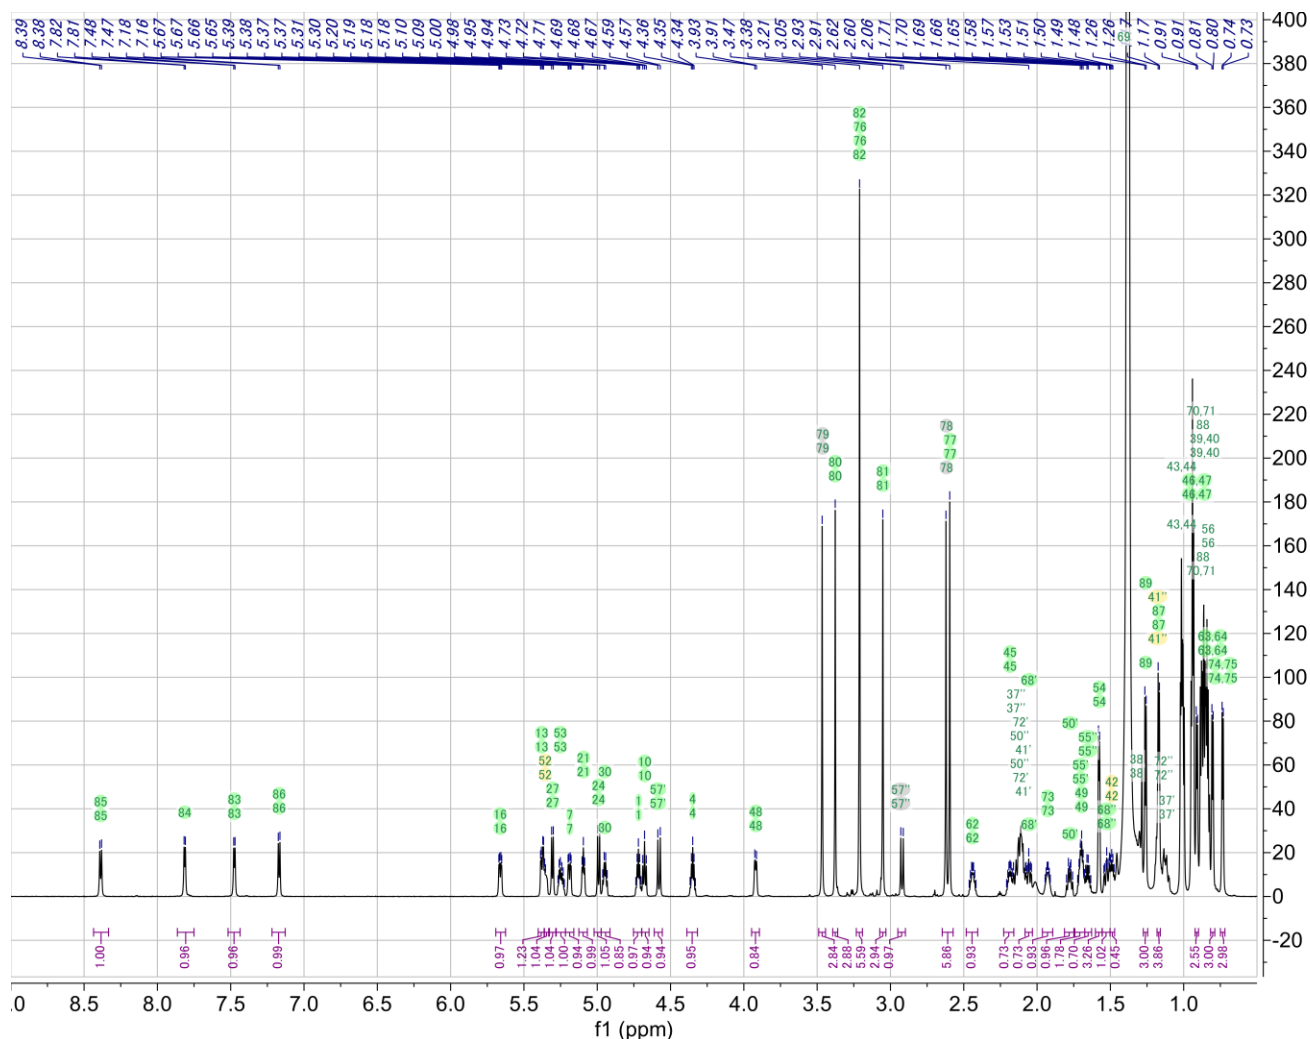

**Figure S24.** NMR Spectra of CSA in cyclohexane- $\text{d}_{12}$   $^1\text{H}$  NMR (800 MHz, cyclohexane- $\text{d}_{12}$ )  $\delta$  8.39 (d,  $J = 9.8$  Hz, 1H), 7.81 (d,  $J = 7.1$  Hz, 1H), 7.47 (d,  $J = 7.3$  Hz, 1H), 7.17 (d,  $J = 9.0$  Hz, 1H), 5.66 (dd,  $J = 11.1, 4.4$  Hz, 1H), 5.38 (dd,  $J = 11.9, 4.1$  Hz, 1H), 5.35 (s, 1H), 5.31 (d,  $J = 9.2$  Hz, 1H), 5.25 (dq,  $J = 13.4, 6.3$  Hz, 1H), 5.19 (dd,  $J = 11.7, 4.5$  Hz, 1H), 5.09 (t,  $J = 7.0$  Hz, 1H), 4.99 (d,  $J = 11.2$  Hz, 1H), 4.95 (q,  $J = 8.3$  Hz, 1H), 4.72 (p,  $J = 6.9$  Hz, 1H), 4.68 (t,  $J = 9.6$  Hz, 1H), 4.58 (d,  $J = 13.3$  Hz, 1H), 4.35 (p,  $J = 7.3$  Hz, 1H), 3.92 (d,  $J = 9.0$  Hz, 1H), 3.47 (s, 3H), 3.38 (s, 3H), 3.21 (s, 6H), 3.05 (s, 3H), 2.92 (d,  $J = 13.4$  Hz, 1H), 2.61 (d,  $J = 20.7$  Hz, 6H), 2.48 – 2.40 (m, 1H), 2.18 (tt,  $J = 13.2, 6.6$  Hz, 1H), 2.06 (ddd,  $J = 14.7, 10.8, 4.0$  Hz, 1H), 1.93 (dt,  $J = 11.6, 6.0$  Hz, 1H), 1.78 (dt,  $J = 13.4, 9.7$  Hz, 1H), 1.70 (h,  $J = 7.4$  Hz, 2H), 1.65 (dt,  $J = 14.0, 7.1$  Hz, 1H), 1.58 (d,  $J = 6.3$  Hz, 3H), 1.52 (ddd,  $J = 15.1, 11.9, 3.4$  Hz, 1H), 1.49 (q,  $J = 6.6$  Hz, 0H), 1.26 (d,  $J = 7.2$  Hz, 3H), 1.17 (d,  $J = 7.0$  Hz, 4H), 0.91 (d,  $J = 6.6$  Hz, 3H), 0.80 (d,  $J = 6.8$  Hz, 3H), 0.73 (d,  $J = 6.5$  Hz, 3H).

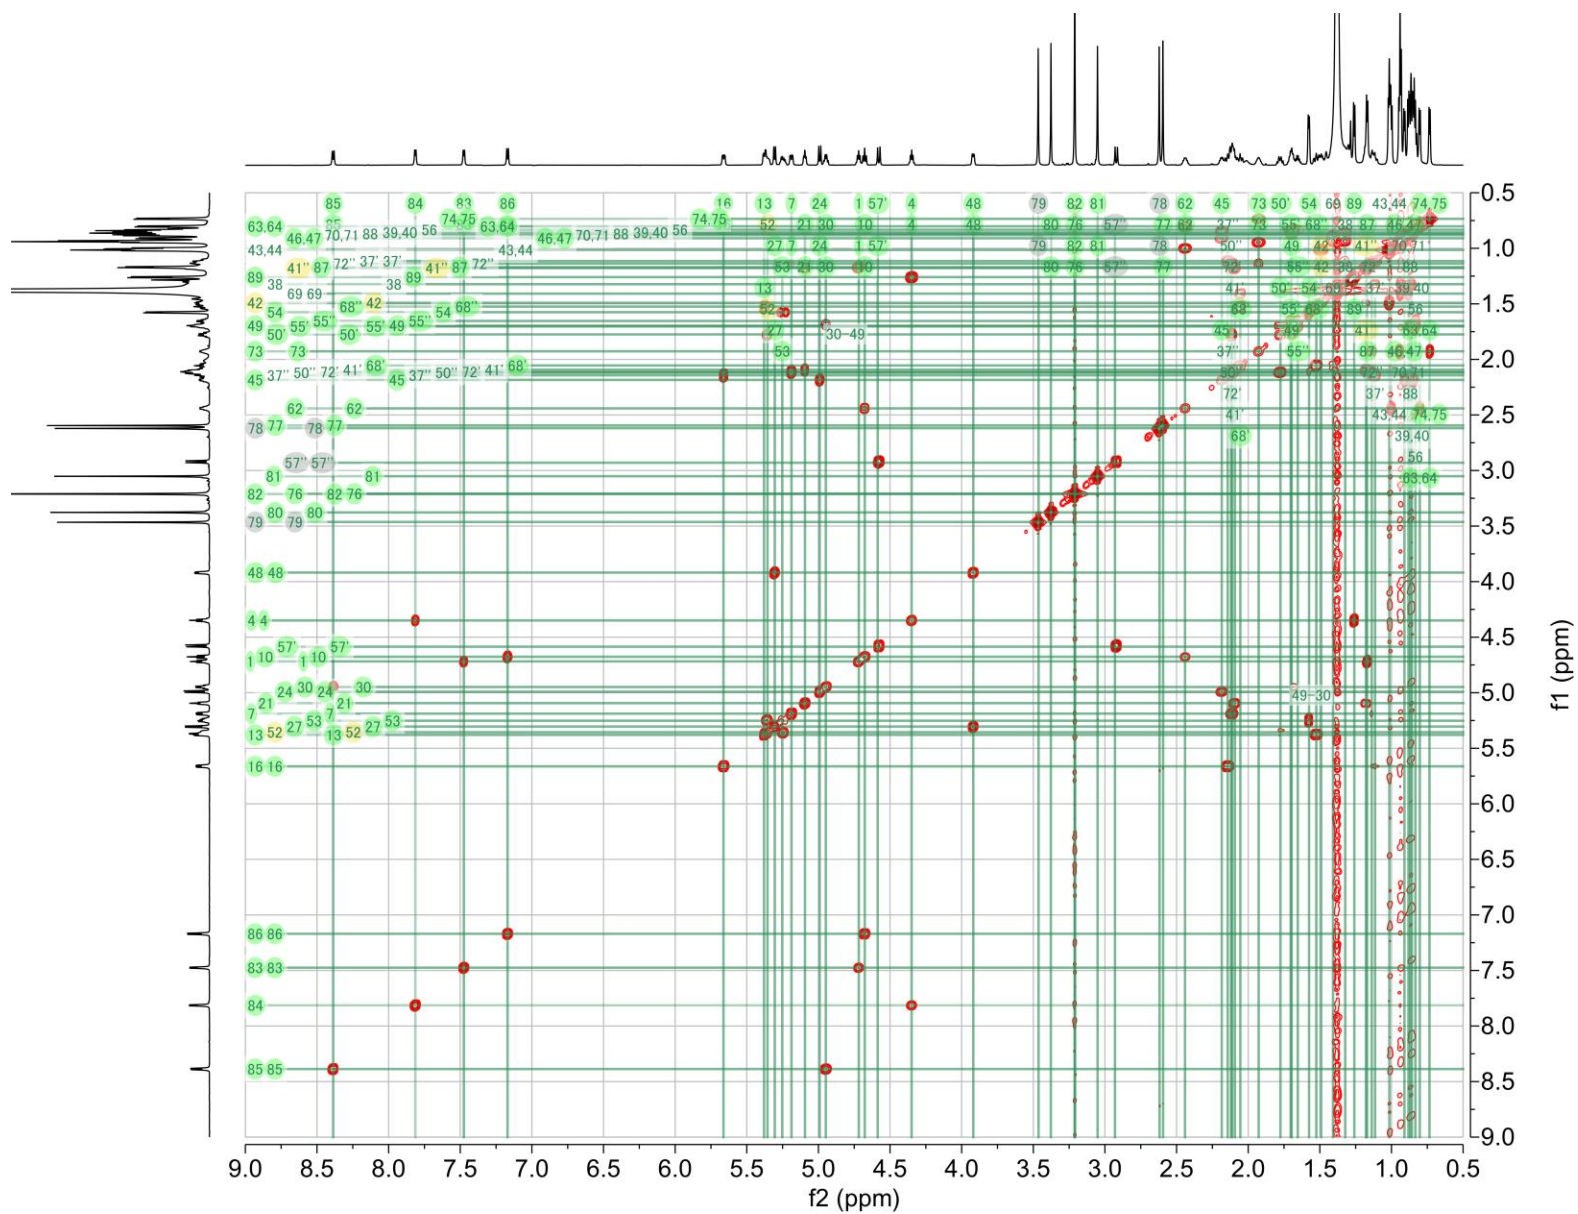

**Figure S25.** COSY Spectra of CSA in cyclohexane-d<sub>12</sub>.



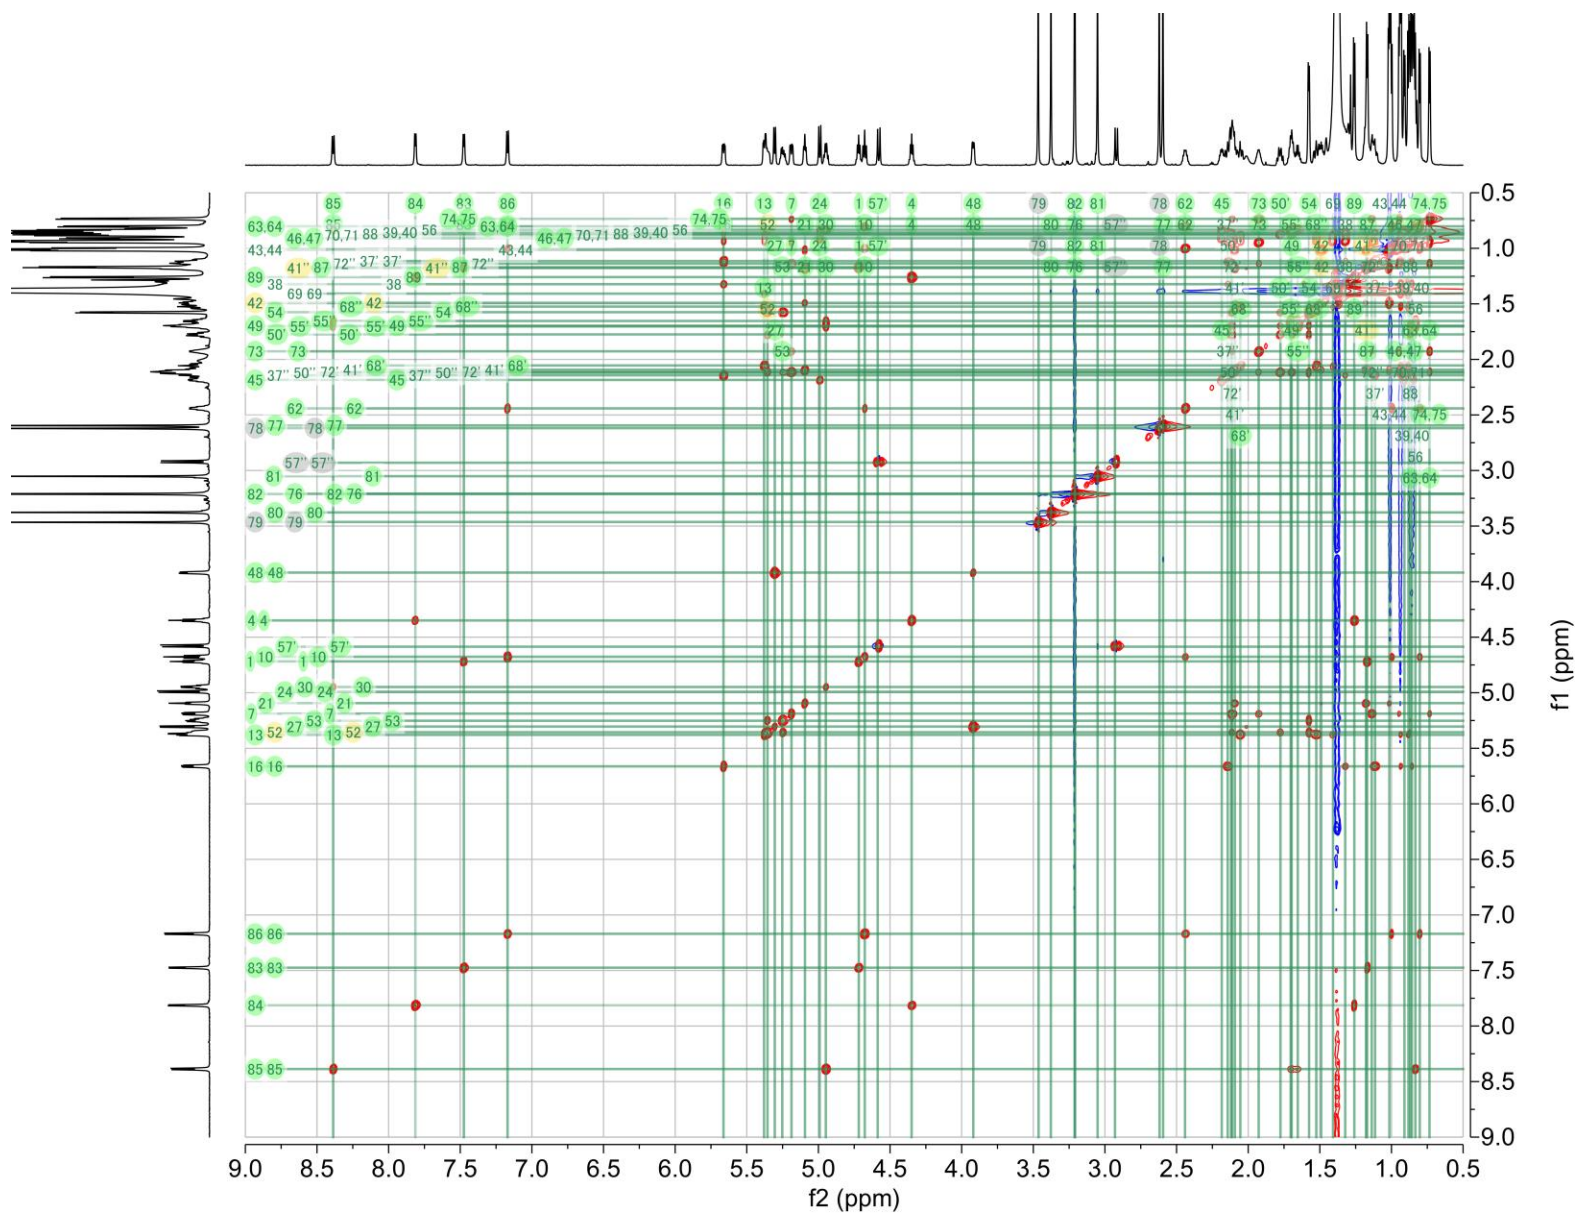

**Figure S26.** TOCSY Spectra of CSA in cyclohexane-d12.

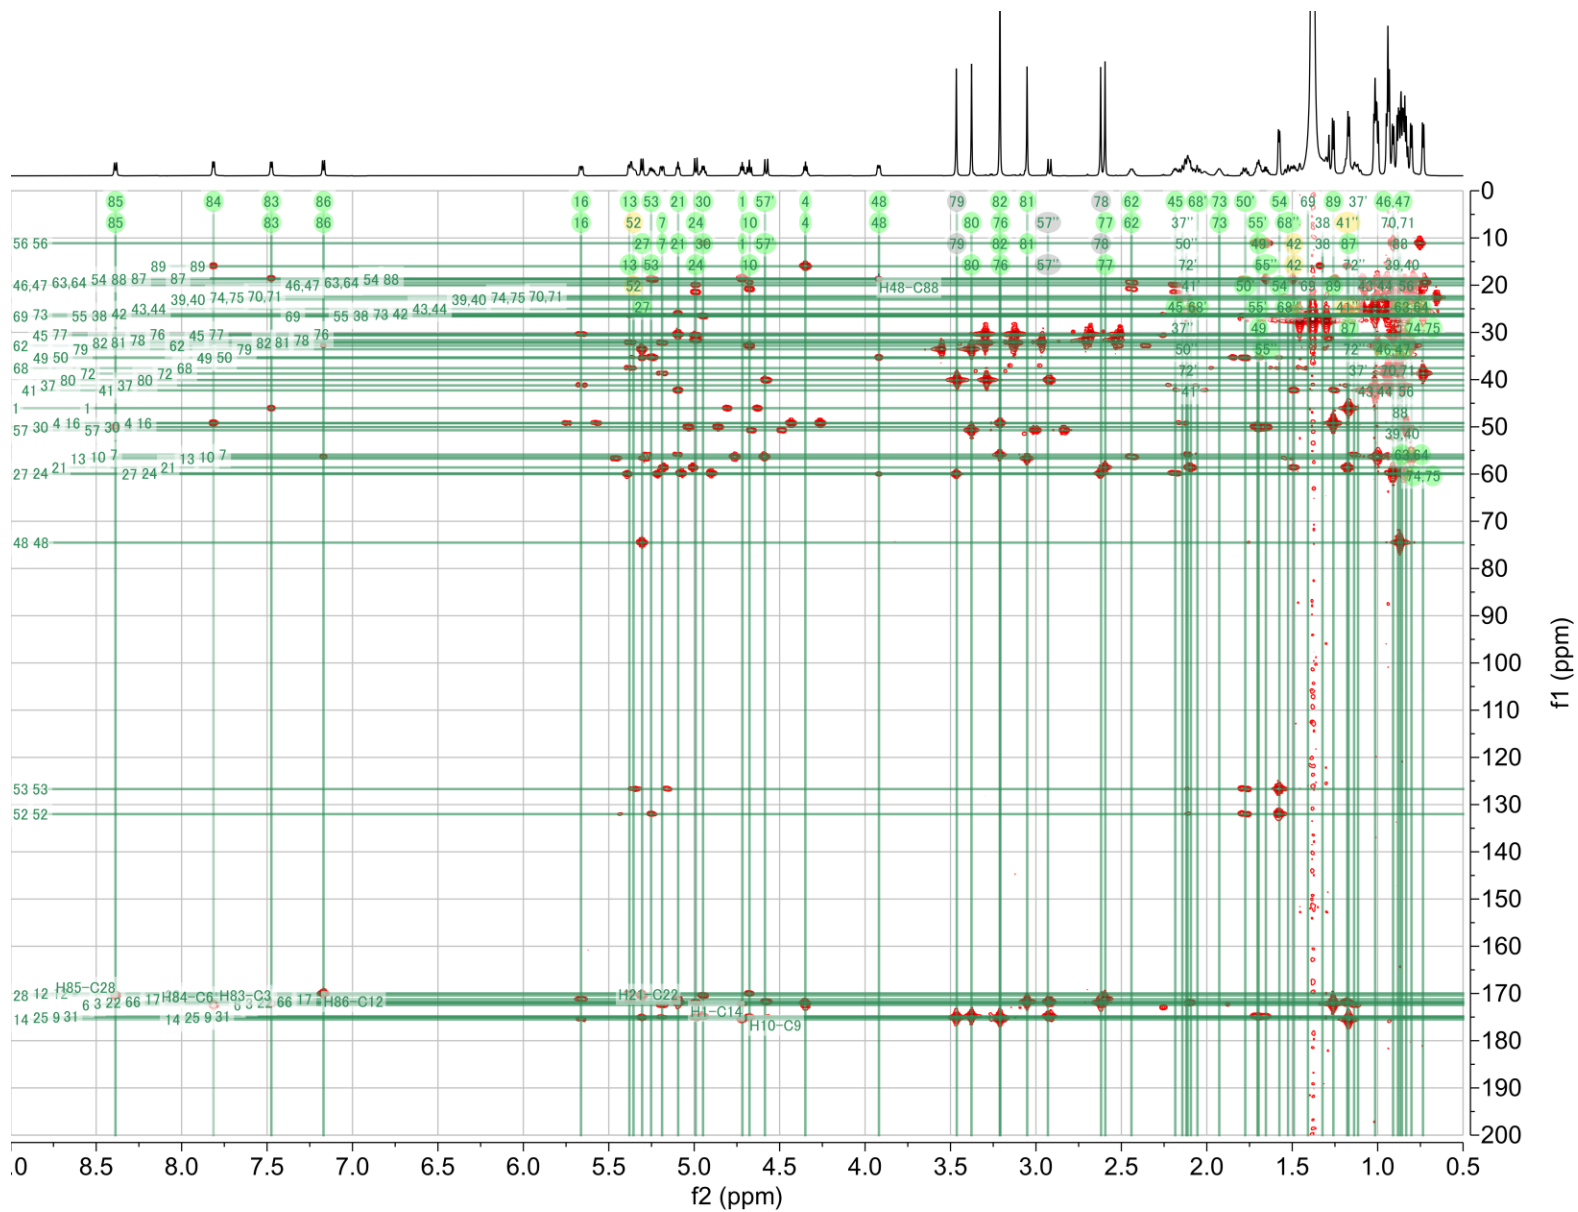

**Figure S27.** HMBC Spectra of CSA in cyclohexane-d<sub>12</sub>.







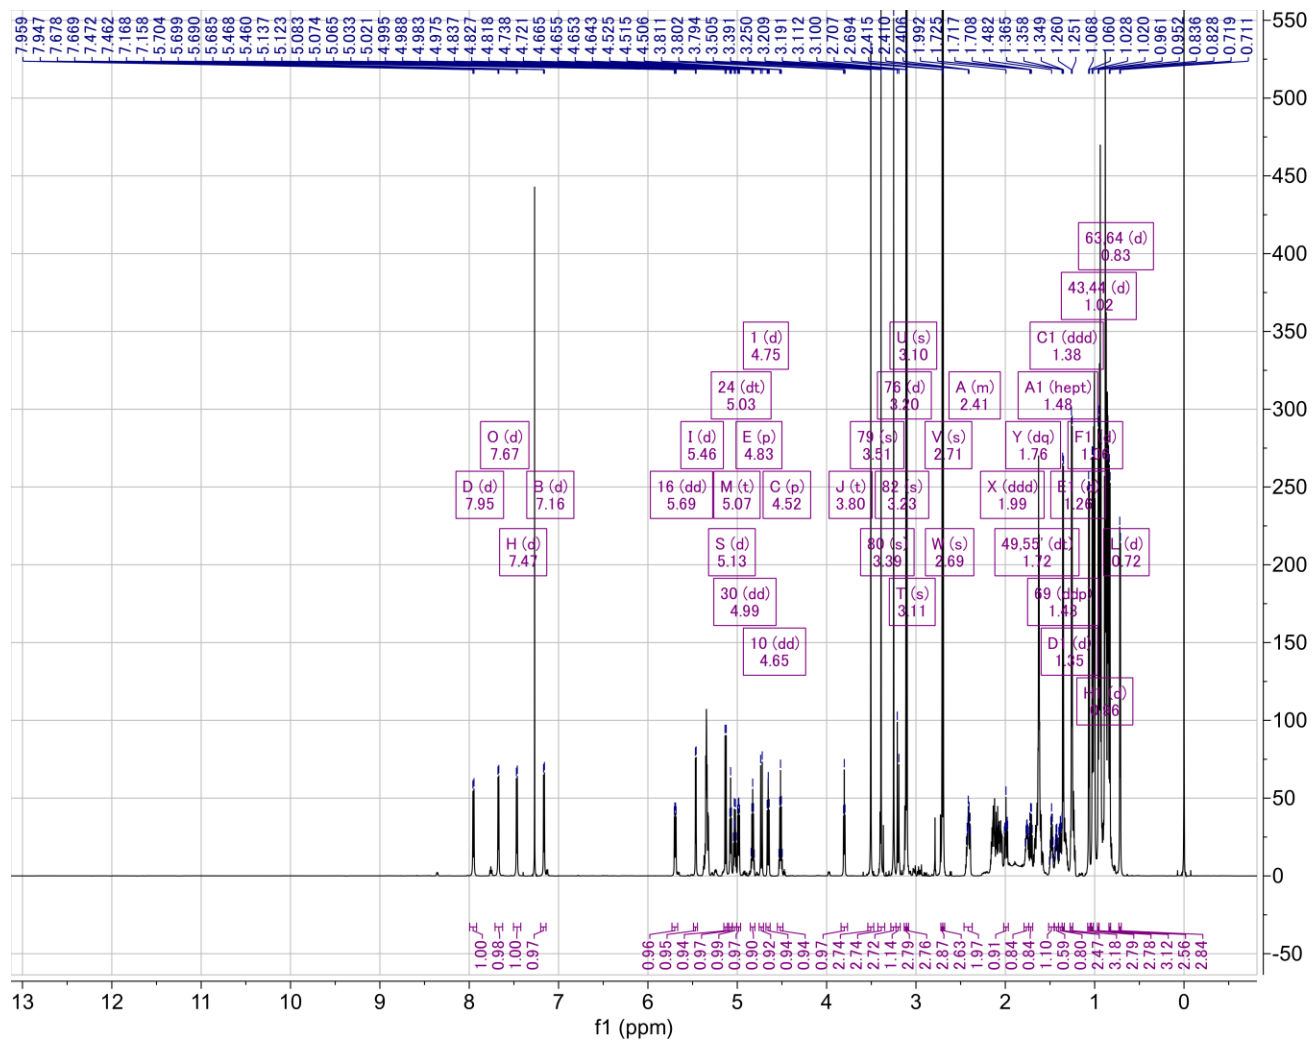

**Figure S30.** NMR Spectra of CsA in n-hexane-d<sub>14</sub>. <sup>1</sup>H NMR (800 MHz, CDCl<sub>3</sub>) δ 8.30 (d, *J* = 9.6 Hz, 1H), 7.75 (d, *J* = 7.1 Hz, 1H), 7.42 (d, *J* = 7.3 Hz, 1H), 7.19 (d, *J* = 8.9 Hz, 1H), 5.70 (dd, *J* = 11.1, 4.4 Hz, 1H), 5.31 – 5.24 (m, 1H), 5.19 (dd, *J* = 11.2, 4.8 Hz, 1H), 5.10 (dd, *J* = 8.2, 5.8 Hz, 1H), 5.04 (d, *J* = 11.1 Hz, 1H), 4.99 (td, *J* = 9.0, 6.4 Hz, 1H), 4.75 (p, *J* = 7.0 Hz, 1H), 4.68 (t, *J* = 9.6 Hz, 1H), 4.61 (d, *J* = 13.4 Hz, 1H), 4.38 (p, *J* = 7.2 Hz, 1H), 3.92 (dd, *J* = 8.7, 3.7 Hz, 1H), 3.48 (s, 3H), 3.39 (s, 3H), 3.23 (s, 3H), 3.20 (s, 3H), 3.06 (s, 3H), 2.94 (d, *J* = 13.4 Hz, 1H), 2.66 (s, 3H), 2.62 (s, 3H), 2.47 (dp, *J* = 10.2, 6.7 Hz, 1H), 2.27 (s, 1H), 1.96 (s, 1H), 1.91 (ddtt, *J* = 12.5, 8.3, 5.8, 3.1 Hz, 1H), 1.83 (s, 0H), 1.80 (dt, *J* = 13.6, 9.4 Hz, 1H), 1.59 (d, *J* = 6.5 Hz, 4H), 1.53 (tq, *J* = 11.6, 4.1, 3.4 Hz, 2H), 1.48 (s, 1H), 1.43 (tdq, *J* = 9.6, 6.7, 3.3, 2.8 Hz, 1H), 1.28 (d, *J* = 7.3 Hz, 5H), 1.19 (d, *J* = 6.9 Hz, 3H), 0.93 (d, *J* = 6.7 Hz, 3H), 0.78 (d, *J* = 6.6 Hz, 3H).

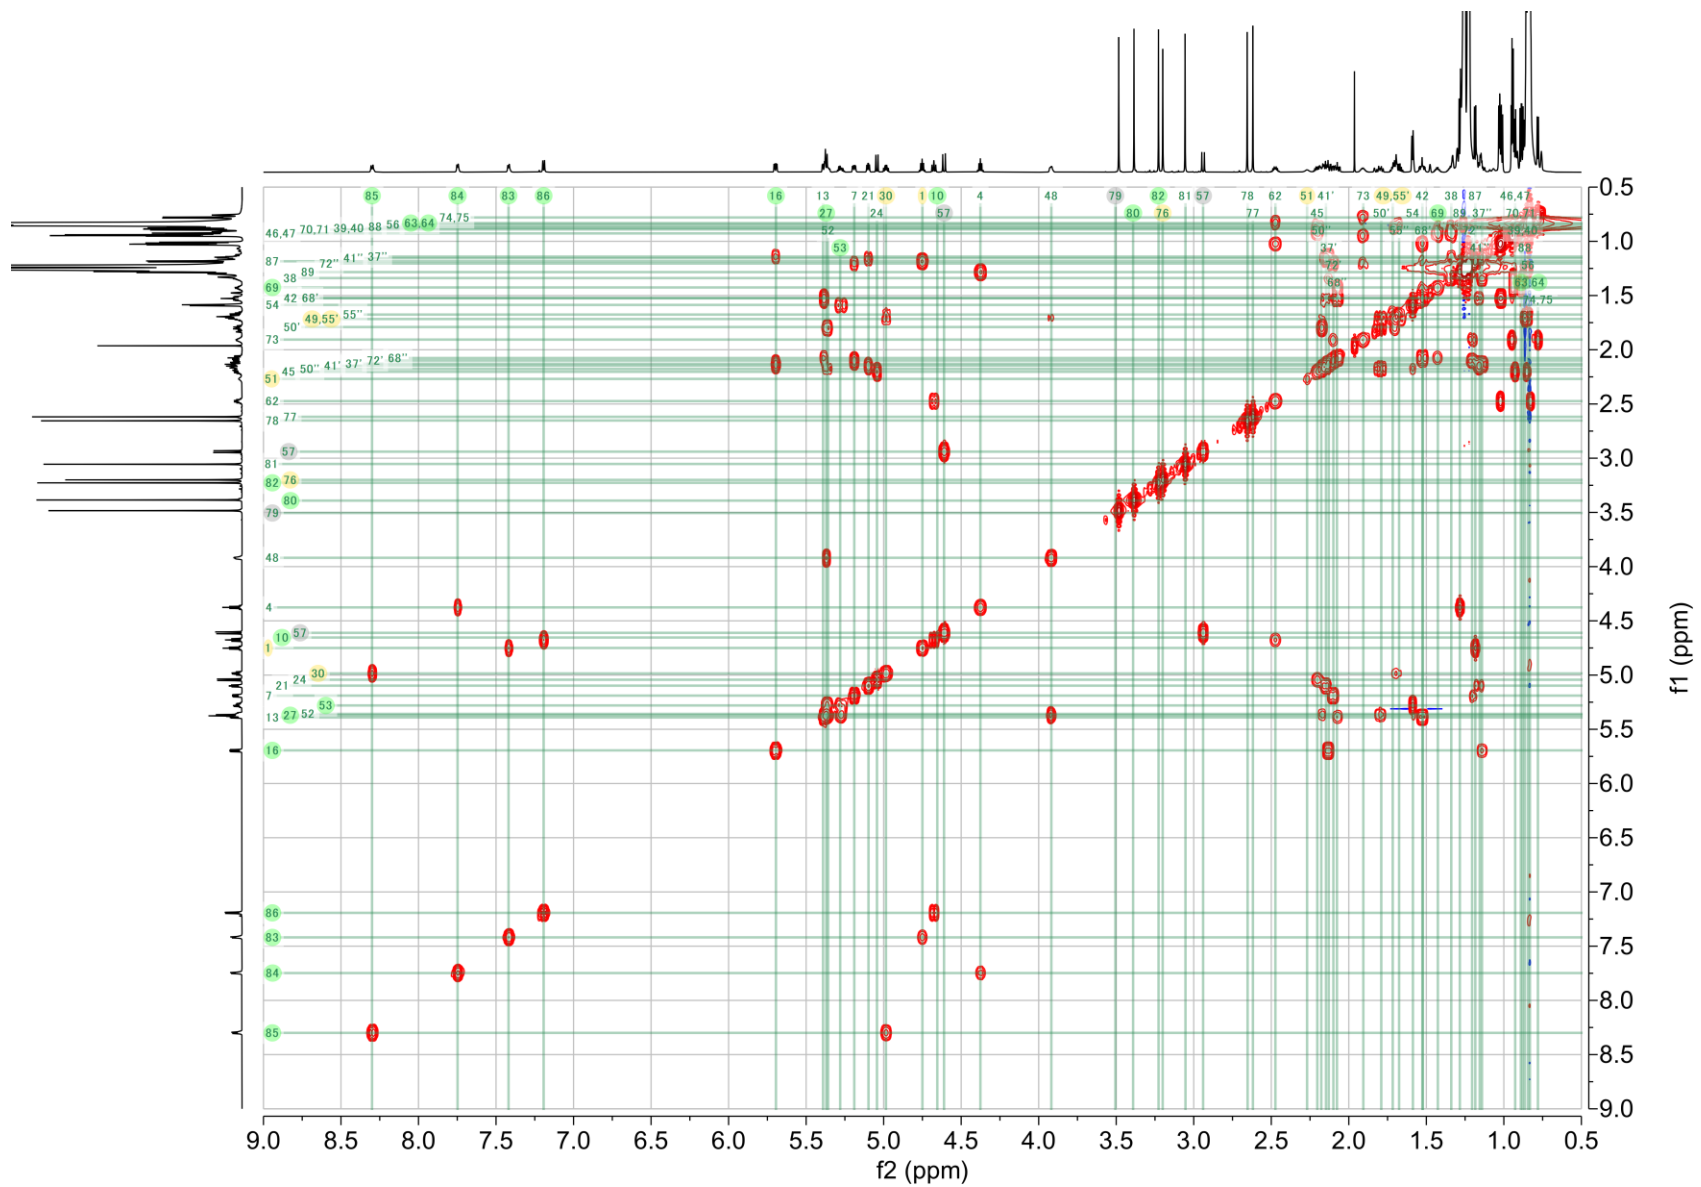

Figure S31. COSY Spectra of CsA in n-hexane-d14.

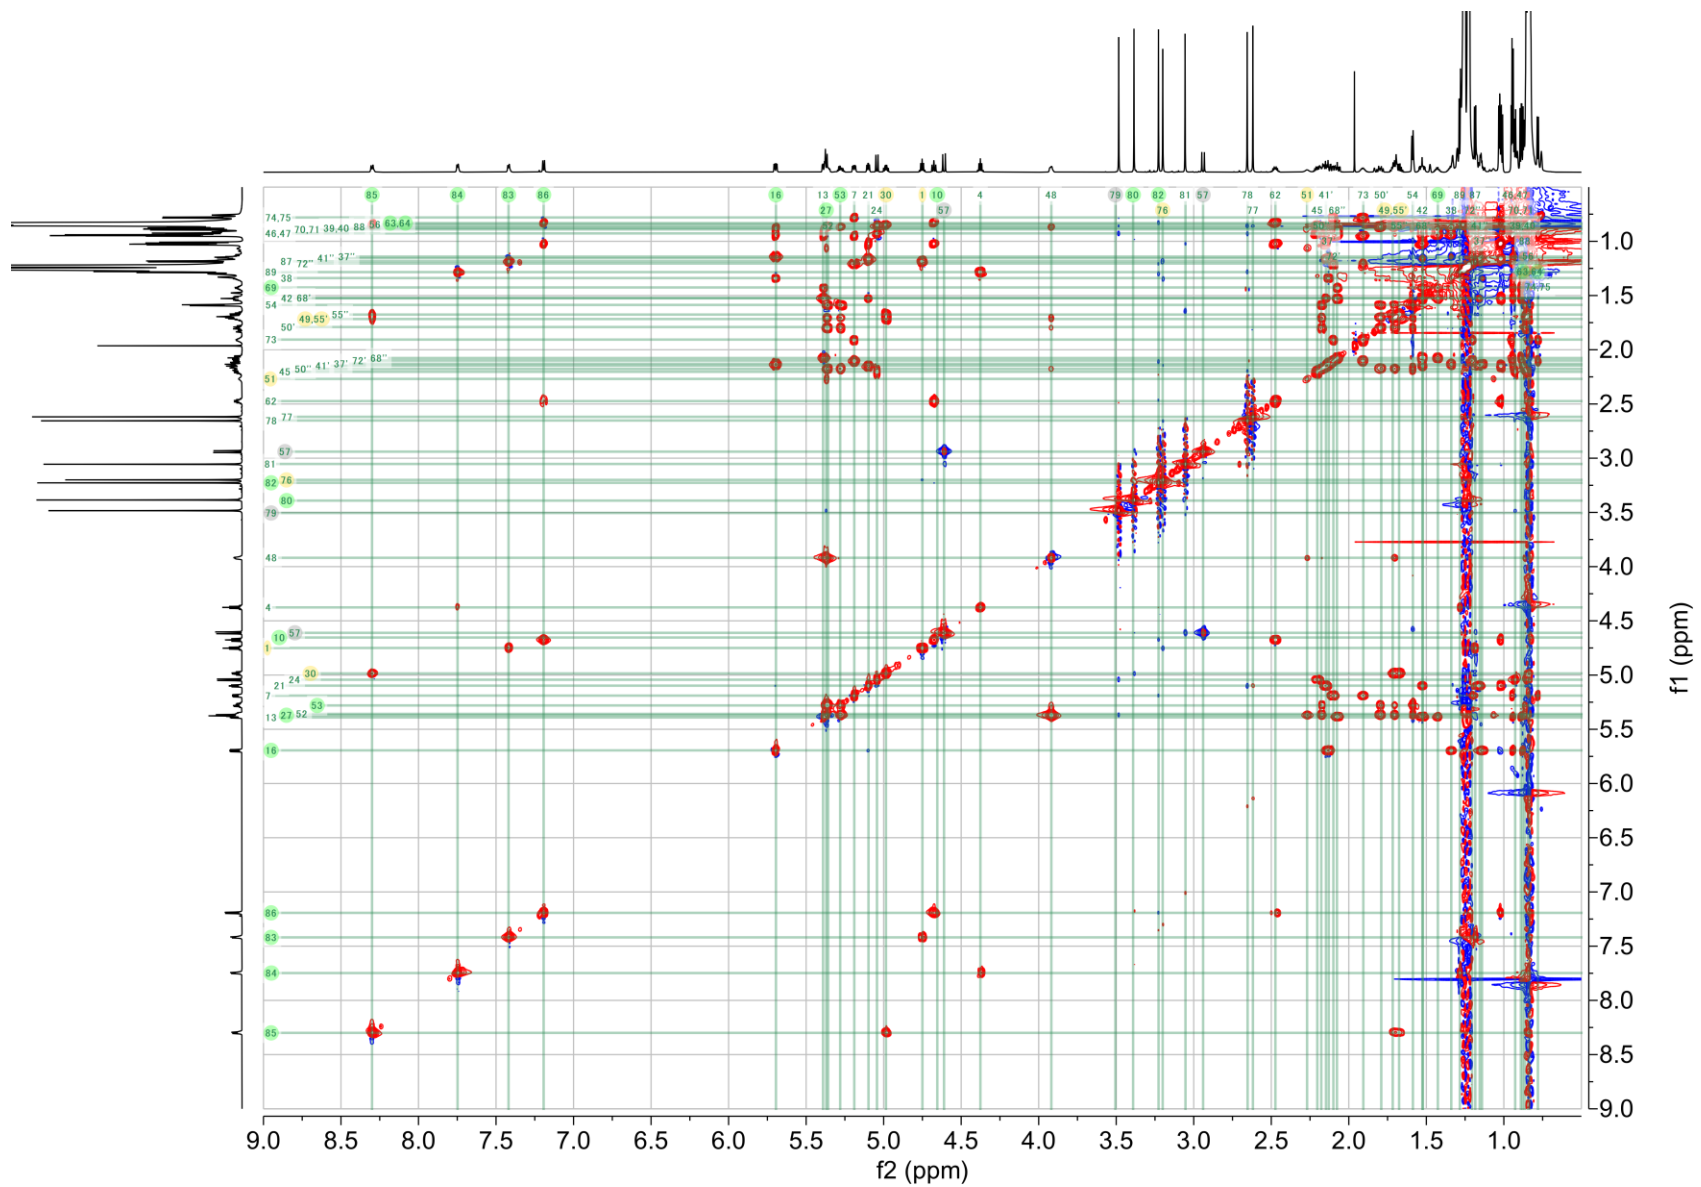

**Figure S32.** TOCSY Spectra of CsA in n-hexane-d14.

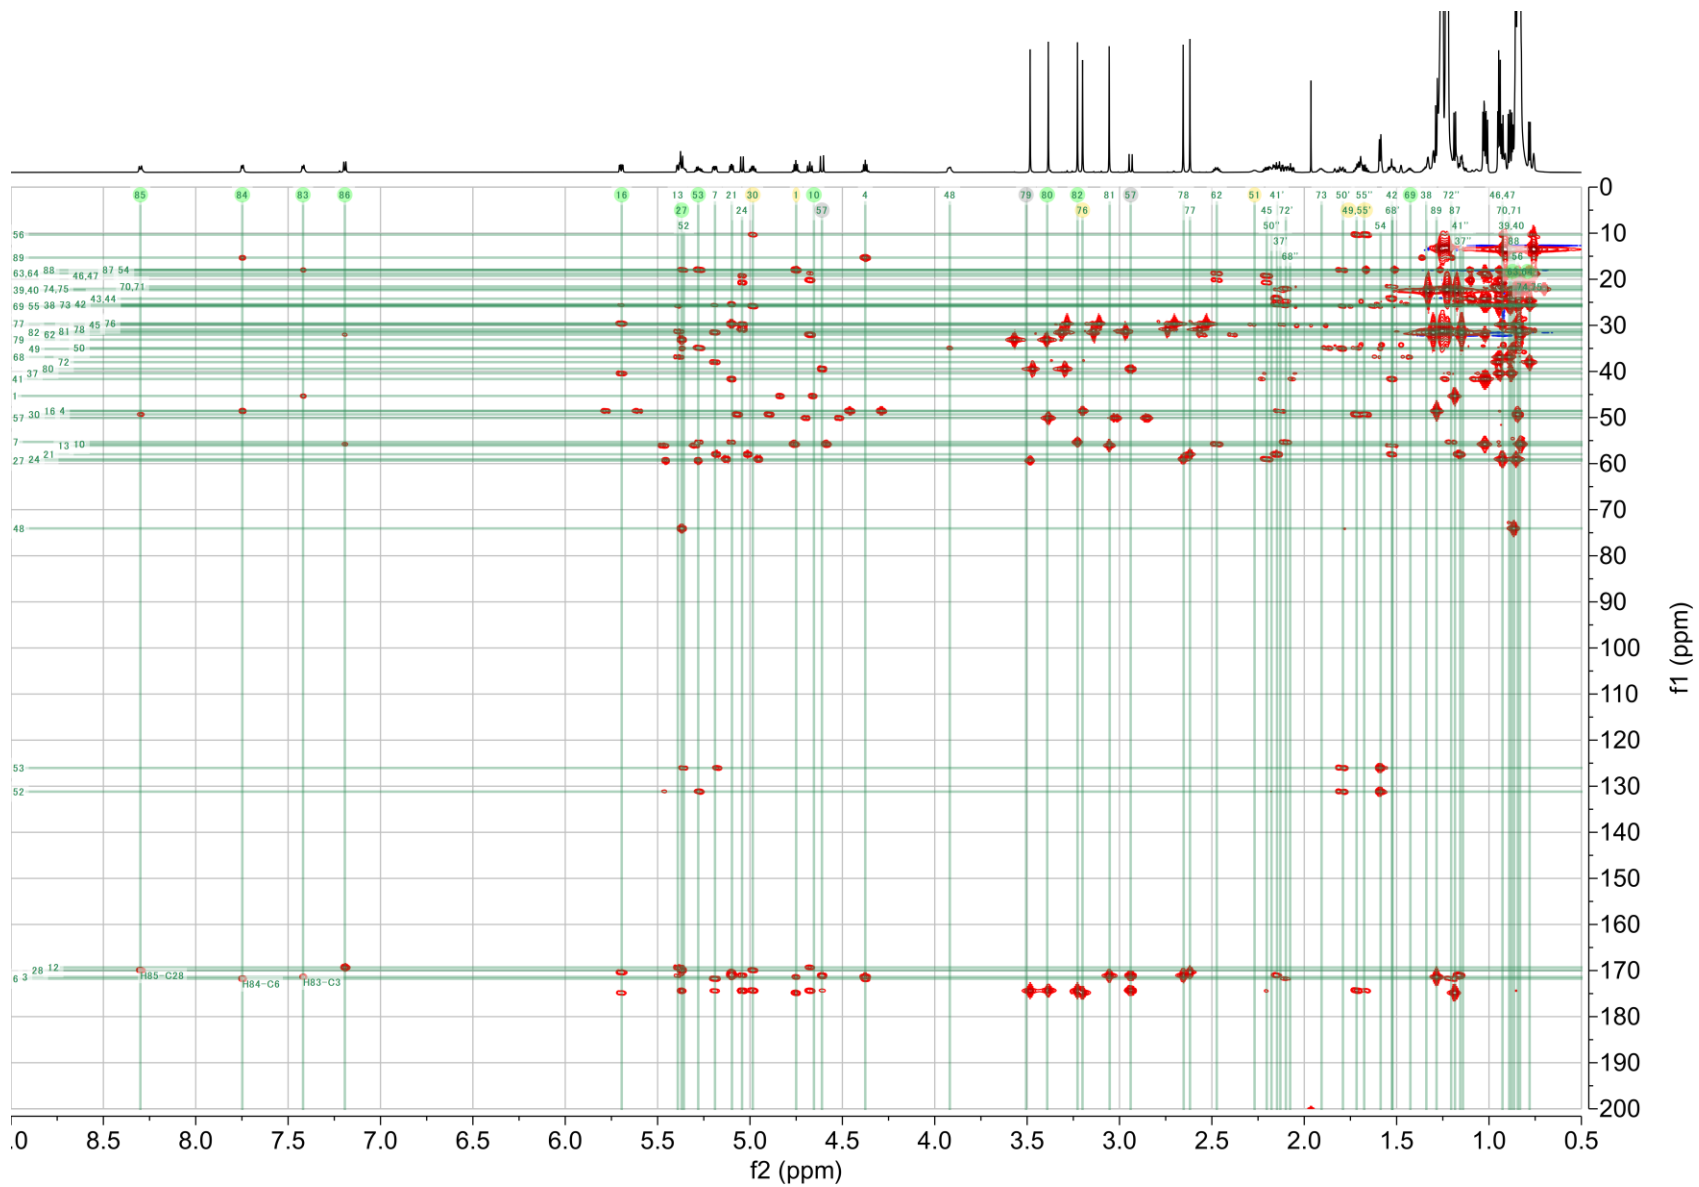

**Figure S33.** HMBC Spectra of CsA in n-hexane-d<sub>14</sub>.







## References

- (1) Carpenter, T. A.; Colebrook, L. D.; Hall, L. D.; Pierens, G. K. Applications of Gradient-Selective COSY and DQCOSY to Brucine and Gibberellic Acid. *Magn. Reson. Chem.* **1992**, *30*, 768–773.
- (2) Kay, L.; Keifer, P.; Saarinen, T. Pure Absorption Gradient Enhanced Heteronuclear Single Quantum Correlation Spectroscopy with Improved Sensitivity. *J. Am. Chem. Soc.* **1992**, *114*, 10663–10665.
- (3) Bax, A.; Summers, M. F. Proton and Carbon-13 Assignments from Sensitivity-Enhanced Detection of Heteronuclear Multiple-Bond Connectivity by 2D Multiple Quantum NMR. *J. Am. Chem. Soc.* **1986**, *108*, 2093–2094.
- (4) Hwang, T. L.; Shaka, A. J. Cross Relaxation without TOCSY: Transverse Rotating-Frame Overhauser Effect Spectroscopy. *J. Am. Chem. Soc.* **1992**, *114*, 3157–3159.
- (5) Bax, A.; Davis, D. G. MLEV-17-Based Two-Dimensional Homonuclear Magnetization Transfer Spectroscopy. *Journal of Magnetic Resonance (1969)* **1985**, *65*, 355–360.
- (6) Higo, J.; Kamiya, N.; Sugihara, T.; Yonezawa, Y.; Nakamura, H. Verifying Trivial Parallelization of Multicanonical Molecular Dynamics for Conformational Sampling of a Polypeptide in Explicit Water. *Chem. Phys. Lett.* **2009**, *473*, 326–329.
- (7) Neale, C.; Pomès, R.; García, A. E. Peptide Bond Isomerization in High-Temperature Simulations. *J. Chem. Theory Comput.* **2016**, *12*, 1989–1999.
- (8) Ono, S.; Naylor, M. R.; Townsend, C. E.; Okumura, C.; Okada, O.; Lokey, R. S. Conformation and Permeability: Cyclic Hexapeptide Diastereomers. *J. Chem. Inf. Model.* **2019**, *59*, 2952–2963.
- (9) Rossi Sebastiano, M.; Doak, B. C.; Backlund, M.; Poongavanam, V.; Over, B.; Ermondi, G.; Caron, G.; Matsson, P.; Kihlberg, J. Impact of Dynamically Exposed Polarity on Permeability and Solubility of Chameleonic Drugs Beyond the Rule of 5. *J. Med. Chem.* **2018**, *61*, 4189–4202.
- (10) Myers, C. A.; D'Esposito, R. J.; Fabris, D.; Ranganathan, S. V.; Chen, A. A. CoSIMS: An Optimized Trajectory-Based Collision Simulator for Ion Mobility Spectrometry. *J. Phys. Chem. B* **2019**, *123*, 4347–4357.
